**A Meta-Analysis of Hippocampal Transcriptional Profiling Studies in a Selectively-Bred Rat Model Provides Converging Evidence with Genetic Sequencing to Implicate Specific Candidate Genes and Pathways in the Liability for Internalizing and Externalizing Psychiatric Disorders**

Isabelle Birt<sup>1\*</sup>, Megan Hagenauer, Ph.D.<sup>1\*</sup>, Sarah Clinton, Ph.D.<sup>2</sup>, Cigdem Aydin, Ph.D.<sup>1</sup>, Peter Blandino, Ph.D.<sup>1</sup>, John Stead, Ph.D.<sup>3</sup>, Kathryn Hilde, Ph.D.<sup>1</sup>, Fan Meng, Ph.D.<sup>1</sup>, Robert Thompson, Ph.D.<sup>1</sup>, Huzefa Khalil, Ph.D.<sup>1</sup>, Alex Stefanov<sup>1</sup>, Pamela Maras, Ph.D.<sup>1</sup>, Zhifeng Zhou, Ph.D.<sup>4</sup>, David Goldman<sup>4</sup>, Stanley Watson, Jr., Ph.D.<sup>1</sup> and Huda Akil, Ph.D.<sup>1</sup>

<sup>1</sup>University of Michigan, Ann Arbor, MI; <sup>2</sup>Virginia Tech, Blacksburg, VA; <sup>3</sup>Carleton University, Ottawa, Ontario, CA; <sup>4</sup>National Institute on Alcohol Abuse and Alcoholism, National Institutes of Health, Bethesda, MD

\*Shared first authorship

Correspondence:  
Megan Hastings Hagenauer, Ph.D.  
e-mail: [hagenaue@umich.edu](mailto:hagenaue@umich.edu)  
Molecular Behavioral Neuroscience Institute (MBNI)  
205 Zina Pitcher Pl.  
Ann Arbor, MI 48109

1 **Abstract**

2  
3 For over 16 years, we have selectively-bred rats to react differently to a novel, anxiety-  
4 inducing environment, exhibiting either high or low exploratory activity. These “bred High  
5 Responder” (bHR) and “bred Low Responder” (bLR) rats serve as a general model for extreme  
6 manifestations of behavioral inhibition and temperament, showing large differences in a variety  
7 of internalizing and externalizing behaviors relevant to both mood and substance abuse  
8 disorders. The current study elucidated persistent differences in gene expression related to  
9 bHR/bLR phenotype across development (P7, P14, P21) and adulthood within the  
10 hippocampus, a brain structure critical for emotional regulation. To do this, we meta-analyzed  
11 eight transcriptional profiling datasets (microarray and RNA-Seq) spanning 43 generations of  
12 selective breeding ( $n=2-6$  rats per group per dataset; total  $n$  per meta-analysis: adult:  $n=46$ , P7:  
13  $n=22$ , P14:  $n=49$ , P21:  $n=21$ ). By cross-referencing these results with a concurrent exome  
14 sequencing study performed on our colony, we pinpointed several genes that are strongly  
15 implicated in bHR/bLR behavioral phenotype, including two genes previously associated with  
16 energy metabolism and mood: Thyrotropin releasing hormone receptor (Trhr) and the  
17 mitochondrial protein Uncoupling protein 2 (Ucp2). Our meta-analysis also highlighted robust  
18 bHR/bLR functional differences in the hippocampus, including a network essential for  
19 neurodevelopmental programming, cell proliferation, and differentiation, which centered on the  
20 hub genes Bone morphogenetic protein 4 (Bmp4) and the canonical Marker of proliferation  
21 (Mki67). Another functional theme was microglial activation and phagocytosis, including  
22 differential expression of pro-inflammatory Complement C1q A chain (C1qa) and the anti-  
23 inflammatory Milk fat globule-EGF factor 8 (Mfge8), situated within a chromosomal loci  
24 implicated by our concurrent genetic study. Given the newly-discovered role of microglia in  
25 synaptic pruning in relationship to neuronal activity during both development and adulthood, we  
26 propose that these functional pathways have the capability to not only direct bHR and bLR rats  
27 along a different developmental trajectory, but to set the stage for a widely-different reactivity to  
28 the environment.

29  
30  
31 **Keywords:** Anxiety, Depression, Hyperactivity, Impulsivity, Limbic, Neonatal, Postnatal, Trhr,  
32 Ucp2, Ncan, Bmp4, Mki67, C1qa, Mfge8, Etv4  
33  
34

## Introduction

Both mood disorders and substance abuse disorders affect approximately 8-10% of adults in the United States each year (1, 2). Due to high comorbidity, these disorders are often classified as either internalizing and externalizing. Internalizing disorders are associated with neuroticism, anxiety, and depression, whereas externalizing disorders are associated with greater risk-taking and novelty-seeking, as seen in mania, substance abuse, and impulse-control disorders (3). This pattern of comorbidity is thought to represent a spectrum of latent liability, which arises from a complex interplay of genetic risk and environmental factors, such as stress and childhood adversity (3–5).

Within our laboratory, we model the genetic contributions underlying both extremes of this spectrum by selectively breeding rats that react differently when introduced to a novel, anxiety-inducing environment. Our “bred high responder” (bHR) rats are highly exploratory, and exhibit multiple behavioral manifestations of a disinhibited, novelty-seeking temperament, including hyperactivity, aggression, and drug-seeking. The “bred low responder” (bLR) rats are highly-inhibited, and show both reduced locomotor activity and general neuroticism, including anxiety and depressive-like behaviors (6–15). Notably, these behavioral propensities are robust and stable, beginning early in development (16, 17) similar to temperament in humans (18).

This highly-differentiated phenotype makes our selectively-bred bHR and bLR rats ideal for observing the developmental programming and adult manifestation of the neurochemistry and morphology underlying internalizing and externalizing tendencies (10, 13, 19). For our current study, we focused on the hippocampus, a region deep in the temporal lobe important for emotion and behavioral inhibition (20–22). The hippocampus regulates reactivity to the environment, including contextual conditioning (20) and the release of glucocorticoids following a stressful event (23, 24). Its volumetric size decreases in response to anxiety and depression due to reductions in cell growth (25). Within the bHR/bLR model, we have previously observed multiple molecular and morphological differences within the hippocampus, including glucocorticoid receptor and growth factor expression, histone methylation, cell proliferation, survival, and overall volume (7, 11, 16, 26, 27).

In our current study, we characterized both the developmental trajectory and stable global differences in gene expression within the hippocampus of bHR and bLR rats by performing a meta-analysis of eight transcriptional profiling datasets (microarray and RNA-Seq) collected across four developmental stages (P7, P14, P21, adulthood) and spanning 43 generations of selective breeding. The top results identified by this meta-analysis included genes with known connections to affective behavior and highlighted functional pathways broadly related to mood and neurodevelopment. Concurrently, we performed a genetic study on our colony that discovered a minimum of seven chromosomal regions containing bHR/bLR segregating variants that are likely to contribute to exploratory locomotor phenotype (28). By comparing across these two studies, we were able to identify differentially-expressed genes situated within implicated chromosomal regions, pinpointing promising candidates that could mediate the influence of selective breeding on exploratory locomotion. Further, we determined which of those candidates were potentially key-players in the hippocampal functional pathways implicated in bHR/bLR phenotype by our transcriptional profiling meta-analysis. We highlight these candidates in our results and discussion below.

## Methods

### The bHR/bLR Rat Colony

**Selective Breeding:** We began selectively-breeding bHR and bLR rats in the Molecular Behavioral Neuroscience Institute (MBNI) at the University of Michigan in 2003 (protocol: (13)).

86 For the first generation, we chose 120 Sprague–Dawley rats (Charles River, Inc) that exhibited  
87 extreme locomotion scores within a novel environment (the top and bottom 20%, respectively).  
88 Since then, we have maintained 12 breeding families in each line. For generations F1-F41, we  
89 amplified the differences between the two lines while minimizing inbreeding by mating the males  
90 and females with the most extreme locomotor scores from each family. At generation F42, the  
91 breeding strategy at MBNI changed to target a phenotypic locomotor score (~1800 beam breaks  
92 for bHR and ~150 beam breaks for bLR) to prevent the lines from becoming more extreme (**Fig**  
93 **1**). During generation F30, a second colony was begun at the University of Alabama-  
94 Birmingham using bHR/bLR rats from the MBNI colony.

95  
96 [FIGURE 1]  
97

98 The transcriptomic datasets used in this meta-analysis were derived from male bHR/bLR  
99 rats that spanned a wide range of generations (F4 to F43). Using breeders from generation F37,  
100 we also produced an bHRxbLR cross (“Intermediate Responder” (bIR) rats). These bIRs were  
101 included in the transcriptional profiling and behavioral analysis associated with the  
102 *MBNI\_RNASeq\_F37* dataset.

103  
104 **Animal Care:** On postnatal day 1 (PND1), litters were reduced to 12 pups (6 males, 6  
105 females) and raised by their mothers. Following weaning, the rats were housed 2-3 per cage in-  
106 house and maintained on a 12:12 light:dark schedule, with access to food and water *ad libitum*.  
107 All experiments were approved by the University Committee on the Use and Care of Animals  
108 (UCUCA) at the University of Michigan or at the University of Alabama at Birmingham in  
109 accordance with the National Institute of Health (NIH) Guide for the Care and Use of Laboratory  
110 Animals, dictated by the National Research Council in 1996.

111  
112 **Behavioral Analysis:** In each generation, locomotor response to a novel environment  
113 was assessed between ages P50–75 (protocol: (13)). In association with the  
114 *MBNI\_RNASeq\_F37* dataset, we also measured anxiety-like behavior in adulthood (ages P160-  
115 P167 for bHR and bLR rats, P65-75 for bIR rats) as indexed using the percent time spent in the  
116 open arms of an Elevated Plus Maze (EPM) during a 5 min test (protocol: (29)). The number of  
117 fecal boluses excreted during the EPM test served as a measure of anxiety independent from  
118 spontaneous exploration (30). In association with the *MBNI\_RNASeq\_F43* dataset, we  
119 measured social interaction in adulthood (P92, protocol: (6)) after 15 minutes of exposure to the  
120 anxiogenic EPM (protocol: (31)).

121  
122 **Hippocampal Gene Expression Analyses**  
123

124 **Broad Overview of the Datasets:** Within our meta-analysis of hippocampal  
125 transcriptional profiling studies, we used eight datasets collected from bHR/bLR rats from four  
126 age groups: P7, P14, P21, and adult. We refer to these datasets according to their respective  
127 institution, transcriptomic profiling platform, and generation (**Table 1**).

128  
129 [TABLE 1]  
130

131 When considering the results, please note that the transcriptional profiling platforms  
132 changed with time: earlier generations (F4, F6, F15) were profiled using microarray, whereas  
133 later generations were primarily profiled using RNA-Seq (F29, F37, F43). In general, the tissue  
134 was derived from baseline animals although adults from two studies were exposed to behavioral  
135 testing or repeated saline injections. In all studies, the rats were sacrificed by rapid decapitation  
136 without anesthesia. Within seven datasets, the whole hippocampus was dissected immediately

137 after brain extraction, whereas one dataset performed tissue punches on sliced frozen tissue  
138 from the dorsal hippocampus alone. Details for each dataset can be found in **Table 1** and the  
139 **Suppl. Methods**. Analysis code is available at <https://github.com/isabellie4/PhenotypeProject>  
140 and [https://github.com/hagenaue/bHRbLR\\_MetaAnalysisProject](https://github.com/hagenaue/bHRbLR_MetaAnalysisProject).

141  
142 **Broad Overview of the Data Preprocessing:** We analyzed the datasets individually  
143 and then performed a collective meta-analysis (statistical software: R Studio v.3.3.2, R v.3.2.2).  
144 The pre-processing steps for each study varied according to the platform and data format  
145 (**Suppl. Methods**), but included many common steps, including re-annotation, normalization to  
146 reduce the influence of technical variation, and quality control. Microarray data were typically  
147 summarized into expression sets using the Robust Multi-Array Average method (RMA: (32)),  
148 which adjusted for background signal, corrected technical variation using quantile normalization,  
149 and log(2)-transformed signal values. Similarly, gene-level RNA-Seq read count summaries  
150 were converted to log(2) fragments per million (FPM). Quality control for both data types  
151 included an examination of the overall data distribution for all genes and the pattern of sample-  
152 sample correlations (e.g., principal components analysis). When applicable, transcript data was  
153 averaged by gene symbol to get a single expression value per sample per gene.

154  
155 **Cell Type Data Deconvolution:** After preprocessing, the data underwent a cell type-  
156 based matrix deconvolution procedure using previously-documented cell type-specific gene  
157 expression (R package *BrainInABlender*; (33)). For this analysis, we excluded the small  
158 MBNI\_RNASeq\_F29 dataset (n=2 per group), because the raw data was inaccessible at the  
159 time of analysis. To estimate relative cell type balance, z-score normalized data for genes  
160 previously-identified as having cell type specific expression were averaged for each cell type for  
161 each subject (33). The cell type categories included astrocyte, endothelial, microglia, mural,  
162 oligodendrocyte, immature oligodendrocyte (progenitor), and red blood cell. We excluded  
163 cortically-derived neuronal categories, due to their questionable applicability to hippocampal  
164 tissue.

165  
166 **Calculating Effect Size:** Within each individual dataset, we calculated the effect size  
167 (Cohen's d and variance of d) for the effect of bHR/bLR phenotype on both log(2) gene  
168 expression (either hybridization signal or FPM) and on the estimates of relative cell type  
169 expression ("cell type indices") within each age group (R package *compute.es* (34)). For the  
170 small MBNI\_RNASeq\_F29 dataset, the raw data were not accessible at the time of analysis, but  
171 we were able to re-derive estimated effect sizes from the t-statistic output from the original  
172 *CuffDiff* analysis (35), averaging the small subset of results representing duplicated gene  
173 symbols.

174  
175 **Meta-Analysis:** The Cohen's d and variance of d for each dataset were grouped  
176 according to age (P7, P14, P21, and adult), and aligned using official gene symbol. To be  
177 included in the meta-analysis, a gene was required to be present in at least two datasets. As a  
178 result, the P14 and Adult meta-analyses contained a much larger number of genes because  
179 they contained five datasets, whereas the P7 and P21 meta-analyses each contained two  
180 datasets (**Figure 2**).

181  
182 [FIGURE 2]

183  
184 The meta-analysis was performed on the collective Cohen's d and variance of d for each  
185 age group for each gene using the *rma.mv()* function and visualized using forest plots created  
186 using the *forest.rma()* function (R Package *metafor* (36)). False discovery rate (FDR) was  
187 calculated via the *multtest* package in R (37) using the Benjamini-Hochberg method. Additional

188 exploratory analyses revealed that including generation as a co-variate in the meta-analysis  
189 provided little additional insight (generation: all genes FDR>0.3), most likely due to lack of  
190 power. The cell type meta-analyses followed similar methods. However, the resulting  $p$ -values  
191 did not undergo a multiple comparison correction because there were a small number of cell  
192 types present within each analysis.

193  
194 **Gene Set Enrichment Analysis:** We ran Gene Set Enrichment Analysis (GSEA) (38,  
195 39) to elucidate overall functional trends within the two largest sets of results: P14 and Adult.  
196 The gene lists were ranked according to the beta coefficient values ( $\beta$ ) representing the  
197 magnitude and direction of effect estimated by the meta-analysis. We performed GSEA using  
198 the *fgsea()* function (R package *fgsea* (40); settings: 100,000 permutations, maxSize=1000).

199 We ran GSEA using gene set matrix files (.gmt) containing standard gene ontology  
200 biological processes gene sets for rats (go2msig.org; (41)), and then created a custom .gmt file  
201 (**Suppl. Table 1**) focused on hippocampal-specific gene sets that we curated from three  
202 sources: 1) human hippocampal co-expression modules derived from a large sample of post-  
203 mortem and freshly-resected tissue (42); 2) mouse hippocampal co-expression modules  
204 identified using a large sample (n=100) of behaviorally-profiled animals from the hybrid mouse  
205 diversity panel (43); 3) sets of genes with expression specific to hippocampal neuronal subtypes  
206 or regions (*Hipposeq*: (44)).

207  
208 **Protein-protein Interaction (PPI) Networks:** We further explored the hippocampal-  
209 specific gene sets that were enriched for bHR/bLR differential expression by constructing  
210 predicted PPI networks using string-db.org (45) (confidence setting=0.15 due to pre-existing  
211 evidence suggesting interaction). We also constructed a PPI network using all differentially  
212 expressed genes from the adult meta-analysis (FDR<0.10) and a higher confidence setting  
213 (0.40).

214  
215 **Positional Gene Enrichment Analysis:** We evaluated whether the top bHR/bLR  
216 differentially expressed genes clustered around particular chromosomal locations to explore  
217 which genes may be either co-regulated or in linkage disequilibrium with a causal genetic  
218 variant. To perform this analysis, we extracted top results from the P14 and adult meta-analyses  
219 (nominal  $p$ <0.01), and removed duplicated EntrezIDs. Enrichment at particular chromosomal  
220 loci were then evaluated using Positional Gene Enrichment analysis (PGE,  
221 <http://silico.biotoul.fr/pge/>; (46)). Top clusters ( $p$ <0.001, FDR<0.01) were cross-referenced with  
222 a newer assembly (Rnor\_6.0, [https://www.ncbi.nlm.nih.gov/genome/gdv/?org=rattus-](https://www.ncbi.nlm.nih.gov/genome/gdv/?org=rattus-norvegicus)  
223 [norvegicus](https://www.ncbi.nlm.nih.gov/genome/gdv/?org=rattus-norvegicus)).

224  
225 **Overlap with Previously-Identified Genetic QTLs:** Our concurrent genetic study  
226 performed exome sequencing to identify bHR/bLR segregating variants, and then used a  
227 sampling of those segregating variants to pinpoint QTLs for exploratory locomotion using an  
228 bHRxbLR F2 intercross (28). For our current study, we identified all genes within +/-1MB of  
229 those QTL peaks (LOD>3) using Rnor\_6 annotation from the R package *org.Rn.eg.db* (47) and  
230 the NCBI Genome Remapping Service (<https://www.ncbi.nlm.nih.gov/genome/tools/remap>,  
231 accessed 8/8/2019 using the first 100 bp of each gene and default parameters). We then  
232 evaluated whether our top adult meta-analysis results (FDR<0.05) were enriched for these  
233 QTL genes using Fisher's Exact Test. We also evaluated overlap with additional QTLs relevant  
234 to non-locomotor aspects of the bHR/bLR behavioral phenotype (from the Rat Genome  
235 Database (48), accessed 08/08/2019 using the key words "Anxiety", "Stress", and "Despair",  
236 and Rnor6 chromosomal coordinates).

237 **Examining the Relationship Between Gene Expression and Behavior:** For the two  
238 adult datasets that contained associated behavioral data (*discussed above*), we used simple  
239 bivariate linear models to explore the relationship between gene expression and behavior: total  
240 locomotor score, percent time in the open arm of the EPM, fecal boli produced during the EPM  
241 test, and percentage of time spent interacting socially following exposure to a single mild  
242 stressor. A general effect of phenotype on these variables was evaluated using ANOVA (Type  
243 3).

244 **qPCR Validation:** Using pups from later generations (18 litters: generations F44, F51,  
245 F54, F55, and F57), hippocampal tissue from 6-10 bHR and bLR males was collected at each of  
246 the following time points: P2, P7, P14, P21, P60, P90 (**Suppl. Fig 1**) using methods similar to  
247 those previously described. Following cDNA synthesis using RT-PCR, *Bmp4* transcript was  
248 quantified using qPCR and custom-designed primers (ACC# NM\_012827.2; forward primer: 5'-  
249 CCCTGGTCAACTCCGTTAAT-3', start = 1214; reverse primer: 5'-  
250 AACACCACCTTGTCGTAAGT-3', start = 1319) using the reference gene glyceraldehyde-3-  
251 phosphate dehydrogenase (*Gapdh*) (ACC# NM\_017008.4; forward primer: 5'-  
252 GTTTGTGATGGGTGTGAACC-3', start = 459; reverse primer: 5'-  
253 TCTTCTGAGTGGCAGTGATG-3', start = 628). The calibration curves revealed efficiencies  
254 close to 1 for each probe (*Bmp4*:  $R^2=0.98$ , *GAPDH*:  $R^2=0.99$ , **Suppl. Fig 1**), therefore the qPCR  
255 data for each developmental time point was analyzed using the traditional Livak method (49),  
256 with group differences in  $\Delta C_q$  assessed using Welch's two sample t-test ((50); further details:  
257 **Suppl. Methods**).

258

259

## Results

260

### Selective Breeding Amplifies the Propensity for Internalizing vs. Externalizing Behavior

262 Over sixteen years of selective breeding, bHR/bLR differences in exploratory locomotor  
263 activity grew increasingly prominent (**Fig 1A**). This divergence happened rapidly in a manner  
264 implying oligogenic inheritance (28), a conclusion supported by our recent genetic study (28).  
265 As shown previously (13, 16, 51, 52), these differences in exploratory locomotion were  
266 accompanied by differences in affective behavior. For example, in the behavioral data  
267 accompanying the *MBNI\_RNASeq\_F37* dataset, we observed not only a large effect of  
268 phenotype on total locomotor score ( $F(2,15)=444.47$ ,  $p=4.46E-14$ ), but also an effect on anxiety  
269 as measured by the percent time spent in the open arms ( $F(2,15)=6.72$ ,  $p=8.25E-03$ ) or the  
270 number of fecal boli produced in the EPM ( $F(2,15)=6.40$ ,  $p=9.79E-03$ , *data not shown*), with  
271 bHRs showing less anxiety than bLRs, and bLRs showing an intermediate behavioral phenotype  
272 (**Fig 1B**). In the behavioral data accompanying the *MBNI\_RNASeq\_F43* dataset, bLRs spent  
273 less time interacting socially following exposure to a stressor than bHRs ( $F(1,8)=5.86$ ,  
274  $p=0.0418$ ). Therefore, selective breeding for exploratory locomotion amplified traits that are  
275 broadly associated with internalizing and externalizing tendencies. For this reason, we expected  
276 that an examination of gene expression across bHR/bLR generations would reveal a  
277 convergence of effects within pathways essential to affective behavior and general reactivity to  
278 the environment.

279

### A Meta-analysis of the Effects of bHR/bLR Phenotype on Hippocampal Gene Expression Reveals Promising Candidates: Overview

282 During the many years that we have been selectively breeding bHR/bLR rats, we  
283 conducted eight transcriptomic studies profiling the hippocampus of bHR/bLR rats at four ages:

284 P7, P14, P21, and adult (**Table 1**). The results from these small studies were often noisy, and  
285 produced few reliable results when analyzed individually. For example, the pairwise correlations  
286 between the effect sizes for the individual studies were weak (ranging between  $R=-0.22$  to  
287  $R=0.17$ ), exhibiting almost no overlap amongst the top findings until the very latest generations  
288 (F37 vs. F43:  $R=0.40$ , **Suppl. Figs 2-3**). Nevertheless, a formal meta-analysis of these datasets  
289 revealed multiple robust and interesting candidate genes with consistent differential expression  
290 across multiple generations both in adulthood and development (**Fig 2, Table 2, Suppl. Table**  
291 **2**). These results can be explored interactively at  
292 [https://y.mbni.org/bHRbLR\\_HippocampalMetaResults/](https://y.mbni.org/bHRbLR_HippocampalMetaResults/).

293  
294 [TABLE 2]  
295

296 **Adult:** The adult meta-analysis included expression data from a total of 16,269 unique  
297 gene symbols, 4,381 of which were represented in all five datasets. The effect of bHR/bLR  
298 phenotype on gene expression was significant for 74 genes ( $FDR < 0.05$ , **Table 2**), 32 of which  
299 were found in at least four datasets. In general, we observed equal distributions of positive and  
300 negative estimated effect sizes ( $\beta$ ) in the meta-analyses from all age groups (**Figure 2**). We  
301 found that the estimated effect sizes ( $\beta$ 's) tended to be more extreme for genes with expression  
302 data in fewer datasets, most likely because these genes were only present in the RNA-Seq  
303 datasets from later generations. For that reason, as a point of comparison we ran a meta-  
304 analysis using just the adult RNA-Seq data from the two most recent generations (F37 and  
305 F43), and confirmed that similar differentially-expressed genes and pathways were identified  
306 (**Suppl. Fig 4**). Therefore, the differentially-expressed genes that were identified within the full  
307 meta-analysis using data from a greater number of datasets are of particular interest because  
308 we have evidence that their expression began diverging during the earliest generations in  
309 addition to clear evidence that they are differentially expressed in recent generations.

310  
311 **Development:** The effects of bHR/bLR phenotype on gene expression in the  
312 developmental meta-analyses were less robust, most likely due to a greater dependency on  
313 data from earlier generations. The P14 meta-analysis included expression data from a total of  
314 15,682 unique gene symbols, 2,353 of which were represented in all five datasets. None of  
315 these genes showed an effect of bHR/bLR phenotype that survived false detection correction  
316 ( $FDR < 0.05$ ), but the top gene, Bone morphogenetic protein 4 (Bmp4), was consistently  
317 expressed at lower levels in bHRs than bLRs within both the P14 ( $\beta = -1.49$ ,  $p = 9.40E-06$ ,  
318  $FDR = 1.47E-01$ ) and adult datasets since the F4 generation ( $\beta = -1.04$ ,  $p = 1.01E-03$ ,  $FDR = 9.38E-$   
319  $02$ , **Fig 3**) and was highlighted in many of our functional analyses (*discussed below*). We  
320 confirmed this differential expression across development (P2, P7, P14, P21, P60, P90) using  
321 qPCR and two separate cohorts of rats (**Fig 4, Suppl. Fig 1**; Welch's t-test: P2:  $\text{Log}(2)FC = -$   
322  $1.11$ ,  $T(17.0) = -2.52$ ,  $p = 0.0219$ ; P7:  $\text{Log}(2)FC = -1.68$ ,  $T(14.2) = -3.34$ ,  $p = 0.00483$ ; P14:  
323  $\text{Log}(2)FC = -3.74$ ,  $T(5.60) = -6.10$ ,  $p = 0.00115$ ; P21:  $\text{Log}(2)FC = -1.59$ ,  $T(7.72) = -2.76$ ,  $p = 0.0257$ ;  
324 P60:  $\text{Log}(2)FC = -2.04$ ,  $T(5.99) = -3.22$ ,  $p = 0.0182$ ; P90:  $T(8.74) = -6.87$ ,  $p = 8.44E-05$ ).

325  
326 [FIGURE 3, FIGURE 4]  
327

328 The P7 and P21 meta-analyses included a much smaller sample size (only two datasets  
329 in each) and expression data from a much smaller number of unique gene symbols (3,527).  
330 Despite these constraints, within the P7 meta-analysis one gene, Neurocan (Ncan), survived  
331 FDR correction. Ncan was more highly expressed in bLRs since as early as the F6 generation,  
332 showing an unusually strong effect size ( $\beta = -4.16$ ,  $p = 1.38E-07$ ,  $FDR = 4.86E-04$ ; **Fig 5**). Ncan  
333 also showed nominally higher expression in bLRs within the P14 meta-analysis ( $\beta = -0.89$ ,



334  $p=0.010$ , FDR=0.72), and the trend persisted in the adult meta-analysis ( $\beta= -0.57$ ,  $p=0.067$ ,  
335 FDR=0.47).

336 [FIGURE 5]

337

### 338 **Many of the Top Differentially-Expressed Genes Are Located Within Quantitative Trait** 339 **Loci for Exploratory Locomotion Identified by Our Concurrent Genetic Study**

340 A concurrent genetic study performed on our colony used exome sequencing to identify  
341 genetic variants segregating selectively-bred bHR and bLR rats, and then used a sampling of  
342 those variants to perform a whole-genome analysis identifying QTLs for exploratory locomotor  
343 activity in an bHRxbLR F2 intercross (28). They identified seven genome-wide significant QTL  
344 peaks (LOD>4), and six additional promising candidates (LOD>3) that are likely to contribute to  
345 bHR/bLR differences in exploratory locomotion. These 13 candidate loci also overlapped  
346 extensively with other previously-identified QTLs present in the Rat Genome Database (48)  
347 relevant to non-locomotor aspects of the bHR/bLR behavioral phenotype, including QTLs for  
348 anxiety (53–58), stress response (59–61), and behavioral despair (62). We found that eight of  
349 the top differentially-expressed genes within our adult meta-analysis (FDR<0.05) were located  
350 within these loci (**Figure 6A**), including two genes previously associated with internalizing and  
351 externalizing behaviors (Trhr, Ucp2; **Fig 7&8**, (63–68)), and two genes highlighted by our  
352 functional analyses (Trhr, Mfge8, **Fig 7&9**, *discussed below*). In general, the top differentially  
353 expressed genes from our adult meta-analysis (FDR<0.05) were 4.5x more likely to be located  
354 within a QTL for exploratory locomotion (LOD>4) than the rest of the genes included in our  
355 analysis (**Figure 6B**, Fisher's exact test:  $p=0.00353$ ). This pattern of results fits our expectation  
356 that the influence of bHR/bLR segregating genetic variants on exploratory locomotion is at least  
357 partially mediated by effects on gene expression within the hippocampus.

358

359 [FIGURE 6]

360

### 361 **Positional Gene Enrichment Analysis Specifies Narrower Chromosomal Regions** 362 **Contributing to bHR/bLR Phenotype**

363 Using our transcriptomic data, Positional Gene Enrichment (PGE) identified 132  
364 chromosomal regions that showed a significant enrichment (FDR<0.05) of differentially  
365 expressed genes within the P14 and adult meta-analyses. We focused on the top 13 regions,  
366 which showed FDR<0.001 (**Figure 6C**). Ten of these top loci included genes with differential  
367 expression that survived FDR<0.10 in the adult meta-analysis, and most loci (10/13) were also  
368 confirmed using a PGE analysis of adult meta-analysis results using only RNA-Seq data from  
369 the two most recent generations (F37 & F43), ruling out any bias towards regions  
370 overrepresented on older microarray platforms. Notably, three of the top loci were narrow  
371 regions within previously-identified QTLs for exploratory locomotor activity in a bred bHRxbLR  
372 F2 intercross (28) (LOD>4; *discussed above*), encompassing two differentially-expressed genes  
373 previously associated with internalizing and externalizing behavior (Ucp2, Trhr; **Fig 7 & 8**, (63–  
374 68)). Several of the loci also contained differentially expressed genes highlighted by our  
375 functional analyses below (Trhr, Etv4, C1qa, **Fig 7 & 9**, **Suppl. Fig 7**). Provocatively, even  
376 though the top loci identified by PGE were much narrower than the regions identified as QTLs  
377 for exploratory locomotion in our concurrent genetic study (measured in KB instead of MB), they  
378 overlapped with a strikingly high percentage of the QTLs relevant to externalizing and  
379 internalizing behaviors identified within the Rat Genome Database (RGD: (48)), including 13%  
380 of the QTLs for anxiety (6/45, (53–56)), 21% of the QTLs for stress-related responses (8/38,  
381 (59–61, 69–71)), and 23% of the QTLs for behavioral despair (3/13, (62)), suggesting that these  
382 loci could represent variants contributing to internalizing/externalizing aspects of the bHR/bLR  
383 behavioral phenotype beyond exploratory locomotion.

384

385 [ FIGURE 7, FIGURE 8, FIGURE 9]

386

### 387 **bHR/bLR Differential Expression is Enriched within Particular Functional Pathways**

388

389 ***bHR/bLR Phenotype is Associated with Proliferation and Differentiation:*** When  
390 running GSEA using traditional functional ontology gene sets, eight gene sets (out of 2,761)  
391 showed an enrichment of differential expression within the P14 meta-analysis (FDR<0.05), all of  
392 which were upregulated in bLRs (**Fig 3, Suppl. Table 3, Suppl. Fig 5**) and predominantly  
393 related to neurogenesis, neuron differentiation, and nervous system development. Within the  
394 adult meta-analysis, 2 of the 4 top gene sets showing an enrichment of differential expression  
395 (FDR<0.1, out of 2,761 total) were similarly related to proliferation and development, but  
396 upregulated in bHRs. This pattern continued to be present within the adult meta-analysis results  
397 when only considering RNA-Seq data from the latest generations (F37 and F43, **Suppl. Table**  
398 **3**).

399 In general, the top genes in these pathways in development and adulthood included  
400 Sox9, Bmp4, Farp1, Bex1, Cd24, Mfge8, Apln, Cav1, Hes5, Htra1, and Glul. Indeed, a PPI  
401 network constructed using the top genes from the adult meta-analysis (192 genes with  
402 FDR<0.10) included a dominant subnetwork that highlighted many of these same genes (**Fig 3**),  
403 and centered on hub genes including the top result from the P14 meta-analysis, Bmp4, and the  
404 canonical marker of proliferation Mki67. This network also included Sox9, which is located within  
405 a chromosomal loci that is highly enriched for differential expression overlapping QTLs related  
406 to anxiety and stress-response ((56, 70, 71), **Figure 6C**). A literature search confirmed the PPI  
407 interactions within this subnetwork and highlighted their role in proliferation and differentiation  
408 within the brain, as well as their re-activation in response to injury (72–84).

409

410 ***bHR/bLR Phenotype is Associated with the Dentate Gyrus:*** The functional ontology  
411 results suggested that hippocampal development and renewal might progress differently in bHR  
412 and bLR rats. When performing GSEA using a set of 69 gene sets custom-designed to reflect  
413 hippocampal-specific cell types and networks (**Suppl. Table 1**), we similarly observed an  
414 enrichment of differential expression within two gene sets related to the dentate gyrus (**Fig 7**,  
415 **Suppl. Fig 6, Suppl. Table 3**), the location of neural proliferation within the hippocampus.  
416 Within the P14 meta-analysis, bLRs showed an upregulation of genes with enriched expression  
417 in the dentate gyrus as compared to the Cornu Ammonis (CA) regions (44) (NES<0;  
418 FDR<0.05). Within the adult meta-analysis, bHRs showed an upregulation of genes with  
419 enriched expression in the ventral compared to the dorsal dentate gyrus (44) (NES<0;  
420 FDR<0.05), including one of the top meta-analysis genes, Trhr (FDR<0.05, **Fig 6**) which is  
421 located within a chromosomal loci that was highly enriched for differential expression and  
422 overlaps a QTL for exploratory locomotion (*discussed above*). We confirmed that Trhr is a  
423 strong marker for the ventral dentate gyrus using mouse *in situ* hybridization images publically-  
424 available in the Allen Brain Atlas (85). Interestingly, the differentially-expressed genes  
425 associated with the dentate gyrus-related results were largely independent from those driving  
426 the functional associations with proliferation and cell differentiation.

427

428 ***bHR/bLR Phenotype is Associated with Hippocampal Co-expression Networks***  
429 ***Related to Synaptic Signaling:*** Co-expression modules can capture regionally-important cell  
430 types and functions that remain undocumented in traditional ontology databases (86). We  
431 observed an enrichment of bHR/bLR effects within six hippocampal co-expression modules  
432 within the P14 meta-analysis (FDR<0.05) and within five co-expression modules within the adult  
433 meta-analysis (FDR<0.05, **Fig 7, Suppl. Fig 6, Suppl. Table 3**). For the sake of conciseness,  
434 we have highlighted the results from two of these modules which include genes that were

435 associated with chromosomal loci enriched for differential expression. A more detailed  
436 description can be found in the **Suppl. Results**.

437 The first co-expression module of interest was *lightcyan*, a large module (695 genes)  
438 previously-identified in the mouse hippocampus (43). This module showed elevated expression  
439 in bLRs relative to bHRs (NES<0) in both development (FDR<0.05) and adulthood (FDR<0.10)  
440 and contained three genes with robust bHR/bLR effects in adulthood (FDR<0.05, *Etv4*, *Rltpr*,  
441 *Slc27a1*). One of these genes, *Etv4*, was also found within a chromosomal loci highly enriched  
442 for differential expression (**Suppl. Fig 7**) overlapping QTLs related to anxiety and stress-  
443 response (56, 70, 71). *Etv4* is a transcription factor required for proper hippocampal dendrite  
444 development (87) and, unlike the rest of the co-expression module, was more highly expressed  
445 in bHRs ( $\beta=2.02$ ,  $p=3.30E-05$ , FDR=1.92E-02). When we constructed a PPI network (medium  
446 confidence=0.40) using the genes from this co-expression module that showed bHR/bLR  
447 differential expression in adulthood (n=74,  $p<0.05$ ), we found an enrichment of genes related to  
448 cell projections, neurons, synapses, and cation binding (FDR<0.05).

449 The second module of interest was *sienna3*, which showed elevated expression in bHRs  
450 (NES>0; FDR<0.05) in the adult meta-analysis. The top gene in this module was *Trhr*, which, as  
451 previously discussed, has elevated expression in the ventral dentate gyrus, and was located  
452 within a chromosomal loci overlapping QTLs for exploratory locomotor activity (28), anxiety and  
453 stress-response (55, 59). A PPI network constructed using all 39 genes in this small co-  
454 expression module centered on its ligand, thyrotropin releasing hormone (*Trh*; **Fig 7**), and  
455 included a wide variety of signaling molecules with well-known connections to reward behavior,  
456 including *Cartpt* (88), *Oxt* (89) and *Drd1a* (90, 91).

457  
458 ***bHR/bLR Phenotype is Associated with Microglia and Endothelial-Specific Gene***  
459 ***Expression:*** The functional ontology and co-expression gene set enrichment results suggested  
460 that there might be overall differences in cell type balance in the hippocampus. Therefore, we  
461 applied a more traditional cell type deconvolution method to assess expression specific to a  
462 variety of non-neuronal cell types. At P14 and adulthood, we found that bLRs showed relatively  
463 higher microglial-specific expression compared to bHRs (Adult:  $\beta=-0.65$ ,  $p=4.47E-02$ , P14:  $\beta=-$   
464  $0.69$ ,  $p=2.90E-02$ ; **Fig 9A&C**). At P14, bLRs also showed greater endothelial-specific  
465 expression ( $\beta=-0.89$ ,  $p=5.75E-03$  (**Fig 9B**)). These effects could reflect overall differences in cell  
466 type balance or activation state. Notably, two of the top differentially-expressed genes in the  
467 adult meta-analysis are well-known regulators of microglial state: Milk fat globule-EGF factor 8  
468 (*Mfge8*:  $\beta=1.50$ ,  $p=2.70E-05$ , FDR=1.73E-02, **Fig 9 D&E**), which promotes alternative (M2)  
469 activation, and Complement component C1q A Chain (*C1qa*:  $\beta=-1.40$ ,  $p=6.57E-05$ , FDR=2.61E-  
470 02, **Fig 9 F&G**), which promotes classical activation (92). The differential expression for both of  
471 these genes was also plausibly driven by genetic variants segregating bHR and bLR rats in our  
472 colony: *C1q* was located in a region of chromosome 5 that we found was enriched with  
473 differentially expressed genes and overlapped a previously-identified QTL for anxiety-related  
474 behavior ((55), *discussed above*), and *Mfge8* was located within a QTL on chromosome 1 for  
475 exploratory locomotor activity within our concurrent bHR/bLR genetic study that just barely  
476 missed the threshold for genome-wide significance (28) and overlapped previously-identified  
477 QTLs for anxiety-related behavior (53, 54) and stress response ((60), *discussed above*).

478 Beyond these findings, a comparison of our meta-analysis results (FDR<0.10) with the  
479 new mousebrain.org database (93) indicated that our top bHR/bLR differentially expressed  
480 genes are highly expressed in a variety of hippocampal cell types (**Suppl. Fig 8**). Therefore,  
481 bHR/bLR phenotype correlates with either the activation or balance of cell types within the  
482 hippocampus, as well as gene expression within many kinds of cells, including pathways related  
483 to cell proliferation, differentiation, regional functionality, and synaptic signaling.

484  
485

## Discussion

486  
487  
488  
489  
490  
491  
492  
493  
494  
495  
496  
497  
498  
499  
500  
501  
502  
503  
504  
505  
506  
507  
508  
509  
510  
511  
512  
513  
514  
515  
516  
517  
518  
519  
520  
521  
522  
523  
524  
525  
526  
527  
528  
529  
530  
531  
532  
533  
534  
535  
536

By selectively-breeding rats for over 16 years, we have produced a robust, genetic model of the co-occurrence of common internalizing and externalizing behaviors, including extremes in exploratory activity, anxiety, stress-susceptibility, social interaction, risk-taking, reward-seeking, and drug self-administration (6–17). Such large differences in behavior would be expected to be accompanied by similarly strong differences in gene expression in areas of the brain responsible for affective behavior. However, prior to our meta-analysis, we found that many of the effects of bHR/bLR phenotype on hippocampal gene expression could not be reliably identified within noisy, small individual transcriptional profiling datasets. By performing a formal meta-analysis across multiple datasets, we managed to greatly increase the effective sample size in our study and consequently provided more substantial insight into phenotypic differences in hippocampal gene expression across development and adulthood. Further, by cross-referencing these results with a concurrent exome sequencing study performed within our colony, we were able to hone in on several strong candidates for mediating the influence of selective breeding on behavior. Through exploration of these candidate genes and their interactions we hope to provide initial insight into the gene expression underlying susceptibility to internalizing and externalizing disorders.

### ***Cross-referencing our meta-analysis results with a concurrent genetic study performed on our colony identifies two strong candidates for contributing to bHR/bLR behavioral phenotype: Trhr and Ucp2***

A concurrent exome sequencing study performed on our colony identified genetic variants segregating bred bHR and bLR rats, and then used a sampling of those variants to identify seven genome-wide significant QTL peaks for exploratory locomotor activity in an bHRxbLR F2 intercross (28). These findings offer a first glimpse at the genetic factors contributing to our selectively-bred model. However, the QTLs are broad, encompassing several hundred genes, and it is difficult to predict how the variants contained within these regions influence gene expression and behavior. By cross-referencing the genes encompassed by these QTLs with our differential expression findings within a brain region important for behavioral inhibition and emotional reactivity we identified two particularly strong candidate genes. These candidates have been previously-associated with mood and energetics, and thus seemed capable of mediating the influence of selective breeding on exploratory locomotion as well as other internalizing vs. externalizing behaviors.

The first gene, Thyrotropin Releasing Hormone Receptor (Trhr, or Trhr1), exhibited consistently higher expression in bHRs since at least the F4 generation in the adult meta-analysis. Within our concurrent genetic study (28) we found that Trhr was located on chromosome 7 adjacent to a genetic variant that fully segregated bHR/bLR rats in our colony and within a QTL for exploratory locomotor activity in the bHRxbLR F2 intercross. This region of chromosome 7 overlaps with previously-identified QTLs for anxiety (55) and stress response (59). Within our transcriptomic meta-analysis, we found that a narrow part (1.4 MB) of this locus was enriched for bHR/bLR differentially expressed genes, including Trhr.

Trhr has been studied for years due to its involvement in the hypothalamic-pituitary-thyroid (HPT) axis, which is important for regulating both energetics and mood (94, 95). In previous studies, Trhr1-KO mice displayed increased anxiety and depressive-like behavior (68) similar to our bLRs. Likewise, the Trh analog, Glu-Trh, decreased anxiety in rats (65). We found that Trhr was the top gene within a bHR-upregulated gene set associated with the ventral dentate gyrus (44), a region of the hippocampus that may be particularly important for emotional regulation and stress (20). Its ligand, Trh, was also a hub gene within an bHR-upregulated hippocampal-specific co-expression and protein-protein interaction (PPI) network that included many other genes with well-known connections to reward behavior, including Cartpt (88), Oxt

537 (89) and *Drd1a* (90, 91). Together, this evidence strongly suggests that genetic variation within  
538 the QTL on chromosome 7 is driving differential expression of *Trhr* in the hippocampus in a  
539 manner that may directly contribute to bHR/bLR differences in exploratory locomotion as well as  
540 their propensity for other internalizing vs. externalizing behaviors.

541 The second gene, mitochondrial protein Uncoupling Protein 2 (*Ucp2*), also showed  
542 consistently higher expression in bHRs in the adult meta-analysis across many generations of  
543 selective breeding. *Ucp2* is located on chromosome 1 adjacent to a genetic variant that fully  
544 segregated bHR/bLR rats in our colony and within a QTL for exploratory locomotor activity in the  
545 bHRxbLR F2 intercross (28). This region of chromosome 1 overlaps with previously-identified  
546 QTLs for anxiety (53, 54), and stress response (60). Within our transcriptomic meta-analysis, we  
547 found that a narrow part (1.4 MB) of this region was enriched for bHR/bLR differentially-  
548 expressed genes, including *Ucp2*. In the literature, similar to our bLR rats, *Ucp2*-KO mice  
549 showed higher anxiety-like behavior and lower locomotor activity at baseline, and lowered  
550 resilience to stress (63, 64, 66, 67). Therefore, it seems likely that genetic variation on  
551 chromosome 1 is driving differential expression in *Ucp2* in a manner that may directly contribute  
552 to bHR/bLR differences in exploratory locomotion and the propensity for internalizing behaviors.

553 As a mitochondrial protein *Ucp2* plays a clear role in energetics and metabolism (96)  
554 similar to *Trhr*. Therefore, both candidates imply that it might be useful to perform a general  
555 thyroid and metabolic panel on our bHR/bLR rats, as well as local measurements of energy  
556 metabolism within the hippocampus. There is also evidence that *Trhr* and *Ucp2* could interact  
557 (96). However, our concurrent genetic study found little evidence of epistatic interaction  
558 between the QTLs housing *Trhr* and *Ucp2* on chromosomes 1 and 7 (28). This indicates that  
559 their relevance to bHR/bLR behavioral phenotype may be largely independent, explaining a  
560 small but meaningful portion of the difference in exploratory locomotion between the phenotypes  
561 (<10%, approximately 200 locomotor counts, (28)) – a magnitude akin to the bHR/bLR  
562 difference in locomotor score present in the F1 generation.

563  
564 ***The top genes identified in the developmental meta-analyses suggest that bHR/bLR***  
565 ***differences in hippocampal structure arise early in development alongside differences in***  
566 ***behavior: Ncan and Bmp4***

567 The different propensity of bHR/bLR rats towards externalizing or internalizing behavior  
568 is evident at a young age (16, 17), and likely arises from alterations in hippocampal  
569 development (16). Our meta-analyses encompassed three postnatal ages (P7, P14, and P21) to  
570 provide insight into this neurodevelopmental trajectory. However, these developmental meta-  
571 analyses depended on data derived from earlier generations and older transcriptomic platforms  
572 and thus produced fewer significant results than the adult meta-analysis. Despite this limitation,  
573 the top candidates from both the P7 and P14 meta-analyses are compelling, showing previous  
574 associations with a variety of internalizing and externalizing behaviors as well as clear functional  
575 roles in hippocampal development.

576 The top result from the earliest postnatal age (P7) was *Neurocan* (*Ncan*). It was the only  
577 gene that had an effect of phenotype that survived multiple comparisons correction (FDR<0.05),  
578 exhibiting a strikingly large effect size (bHR<bLR,  $\beta=4.16$ ) as early as generation F6. Similar to  
579 previous studies, we found that *Ncan* was also generally upregulated during early brain  
580 development (97, 98). As part of the extracellular matrix, *Ncan* modulates cell adhesion and  
581 migration and is capable of binding growth factors (99). *Ncan* has been linked to bipolar disorder  
582 (BD) in humans (97), and, similar to our bHR rats, greater externalizing behavior is observed in  
583 *Ncan* knock-out mice, which display higher locomotor activity, less anxiety-like behavior,  
584 increased risk-taking and hedonia, and amphetamine hypersensitivity (98). Within our  
585 concurrent genetic study, *Ncan* was located on chromosome 16 adjacent to a variant that fully  
586 segregated bHR/bLR rats in our colony, but this loci was not found to be a QTL for exploratory  
587 locomotion in the bHRxbLR F2 intercross (28). It did overlap previously-identified QTLs for

588 despair-related behavior (62). Therefore, Ncan may contribute to aspects of the selectively-bred  
589 bHR/bLR behavioral phenotype that are not directly captured by exploratory locomotor score as  
590 well as to long-term structural differences within the hippocampus.

591 The top result within our P14 meta-analysis, Bone Morphogenetic Protein 4 (Bmp4), had  
592 elevated expression in bLRs that did not survive multiple comparisons correction ( $FDR < 0.15$ ),  
593 but this differential expression appeared to continue into adulthood ( $FDR < 0.10$ ), and was  
594 evident as early as the F4 generation, and therefore seemed worthy of additional investigation.  
595 Using additional tissue collected from two separate cohorts and six developmental time points,  
596 we confirmed with qPCR that Bmp4 had consistently higher expression in bLRs across  
597 postnatal development and adulthood (P2-P90), with the largest differences observed at P14.  
598 These results are consistent with the association between Bmp4 and anxiety and depressive-  
599 like behaviors in the literature. Blocking Bmp4 expression in mice reduces anxiety and  
600 depressive-like behavior and increases the effectiveness of certain anti-depressant treatments  
601 (100). Similarly, transgenic mice that are deficient for Bmp receptors have extremely low levels  
602 of anxiety and diminished fear conditioning (101). Therefore, Bmp4 could contribute to the  
603 propensity of bHR/bLR rats for internalizing vs. externalizing behavior.

604 Bmp4 is also a strong candidate for driving long-term structural change in the  
605 hippocampus in a manner that could produce stable differences in temperament. Within our  
606 meta-analysis results, Bmp4 was one of the leading genes driving an enrichment of bHR/bLR  
607 effects within gene sets related to proliferation and development, and was also a central hub in  
608 a related protein-protein interaction (PPI) network constructed using the top genes from the  
609 adult meta-analysis (*discussed below*). Notably, the direction of effect in these gene sets  
610 changed between P14 and adulthood – at P14, gene sets related to proliferation and  
611 differentiation were enriched with elevated expression in bLRs, whereas by adulthood elevated  
612 expression was seen in bHRs. This pattern fits the changing role of Bmp4 across development:  
613 Bmp4 is important for neural induction during early development (102, 103), but later  
614 suppresses neurogenesis (100, 104–106) and promotes other cell fates (102, 107). For  
615 example, Bmp4 can promote endothelial proliferation (84), which matches the elevated  
616 endothelial-specific gene expression that we observed in the bLR hippocampus at P14. Most  
617 importantly, Bmp signaling promotes dorsal cell type identity in the developing telencephalon  
618 and is essential for the proper development of the dentate gyrus (101), fostering the production  
619 of granule cell neurons during the peak period of neurogenesis. Animals lacking Bmp signaling  
620 have a smaller dentate gyrus in adulthood and reduced fear and anxiety (101). These findings  
621 match our results indicating an enrichment of gene expression related to the dentate gyrus in  
622 bLR rats at P14, followed by an enrichment of gene expression normally found in the dorsal (vs.  
623 ventral) dentate gyrus in bLRs in adulthood.

624 Therefore, altogether, elevated expression of Bmp4 in bLR rats during development and  
625 adulthood has the potential to explain a surprising number of our other findings. However, it is  
626 not clear what is driving the differential expression of Bmp4 in our bHR/bLR rats. In our  
627 concurrent genetic study Bmp4 was not located near any of the variants segregating bHR and  
628 bLR rats in our colony nor a QTL for exploratory locomotion (28), although it did overlap with a  
629 previously-identified QTL for despair-related behavior (62). It is possible that a relevant variant  
630 located close to Bmp4 was missed due to the focus on exomes in our original genetic  
631 sequencing study or the differential expression of Bmp4 may be driven by variation within a  
632 gene upstream in its signaling pathway.

### 633 634 ***Functional analyses implicate hippocampal proliferation and differentiation in bHR/bLR*** 635 ***phenotype***

636 As discussed above, one of the most prominent themes amongst the top results in both  
637 our developmental and adult meta-analyses were functions related to cell proliferation and  
638 neuron differentiation, as revealed using both gene set enrichment analyses and co-

639 expression/PPI networks. Indeed, among our top meta-analysis results (FDR<0.05), we found  
640 that the canonical Marker of Proliferation Ki-67 (Mki67) was more highly expressed in bLRs in  
641 adulthood, similar to the upregulation observed histologically in development in earlier  
642 generations (16) and potentially in adulthood (11, 108). bLRs also exhibited greater expression  
643 of ubiquitin-like PHD ring finger-1 (Uhrf1), a regulator of methylation and promoter of cell  
644 survival that is highly expressed in neural stem cells and rapidly down-regulated following  
645 differentiation (109). These findings confirm that, at least within our model, the relationship  
646 between internalizing behavior and cell proliferation is unlikely to be as simple as a general  
647 stunting of growth-related processes, as might be hypothesized based on the neurotrophic  
648 model of stress-related mood disorders (110).

649 Many of our top differentially-expressed genes were also important regulators of cell  
650 fate. In addition to Bmp4, Sox9, Sox2, Hes Family BHLH Transcription Factor 5 (Hes5), Cd24,  
651 and Tek regulate functions such as the developmental progression of neural differentiation,  
652 gliogenesis, and endothelial proliferation (72, 80, 81, 83, 111–113). Differential expression of  
653 genes within these pathways is clearly relevant to neurodevelopmental programming (*discussed*  
654 *above*), but many of these genes were differentially expressed in adulthood – indeed, some of  
655 the effects appeared more robust. The role of these genes in adulthood is less well-studied, but  
656 several have been found to regulate growth and plasticity in response to neural activity and  
657 injury (75, 114–116). Therefore, differential expression within these pathways could explain  
658 observations from our previous morphological study, in which we found that cell differentiation  
659 progressed differently in the adult hippocampus in bHR and bLR rats under conditions of mild  
660 stress. Under these conditions, a higher percentage of newly-born cells in adult bLRs did not  
661 differentiate into either neurons or astrocytes, whereas adult bHRs showed an increased rate of  
662 differentiation into astrocytes (11). Together, these findings raise the interesting possibility that  
663 differential expression within neurodevelopmental programming pathways could provide a  
664 general mechanism by which environmental stimuli, such as stress or drugs, produces divergent  
665 changes in the structure of the hippocampus in bHR and bLR animals.

### 667 ***Functional analyses implicate microglial activation and phagocytosis in bHR/bLR*** 668 ***phenotype***

669 The second theme within our results was microglial function, namely phagocytosis. We  
670 found that microglial-specific gene expression was upregulated at both P14 and adulthood in  
671 bLRs and several top candidate genes were important regulators of microglial function. For  
672 example, within our adult meta-analysis, bLRs exhibited greater expression of C1qa since at  
673 least generation F4, and this expression was associated with decreased exploratory locomotor  
674 activity. The C1q genes promote classical activation and increase microglial phagocytosis (92)  
675 and have been implicated in phagocytosis-driven synaptic pruning (92, 117, 118).

676 Two of the other top candidate genes involved in microglial function were Ucp2 and Milk  
677 fat globule-EGF factor 8 (Mfge8). Unlike the C1q family, these genes showed greater  
678 expression in bHRs. Ucp2, discussed previously for its role in affective behavior, also has an  
679 anti-inflammatory function through its involvement in the production of reactive oxygen species  
680 (ROS) (63, 64, 66, 119, 120). Mfge8 is similarly associated with reduced pro-inflammatory  
681 factors (121) as well as alternative (M2) activation of microglia (122), playing an important role  
682 in microglial phagocytosis (122–124). Notably, within our concurrent genetic study, both Ucp2  
683 and Mfge8 were near genetic variants that fully segregated bHR/bLR rats in our colony and  
684 located within probable QTLs for exploratory locomotor activity (28), suggesting that genetic  
685 variation could contribute to their differential expression in the hippocampus.

686 Together, this set of differentially-expressed genes would seem to suggest that bLR rats  
687 exhibit not only basally elevated microglial-related gene expression but perhaps also an inability  
688 to turn off acute immune response during injury or stress, which would fit pro-inflammatory  
689 theories of anxiety and depression (125). However, within our results we found little evidence of

690 bHR/bLR differences in the expression of traditional inflammatory markers (e.g., Tnf, Il6, Il1b,  
691 Il1a, Ifng) or inflammatory gene sets under basal conditions. Therefore, it seems more likely that  
692 the large bHR/bLR differences in microglial phagocytosis genes are tied to less traditional, non-  
693 immune roles for microglia within the brain. Given the enrichment of bHR/bLR differentially-  
694 expressed genes within pathways related to proliferation, neural differentiation, and  
695 development, the role of microglia and complement activation in both neurogenesis and cell  
696 survival (126) and synaptic pruning (118, 127) seems compelling. Strikingly, these signaling  
697 pathways are dependent on neuronal activity, with microglia preferentially phagocytosing less  
698 active synapses (118). Therefore, in many ways microglial phagocytosis could be considered a  
699 multi-faceted tool to tailor plasticity either during development, or in response to environmental  
700 stimuli like stress or drugs of abuse.

### 701 702 **Conclusion and Future Directions**

703 In conclusion, by comparing across exome sequencing findings and hippocampal gene  
704 expression studies conducted in development and adulthood spanning 43 generations of  
705 selective breeding in our bHR/bLR colony, we implicate a diverse and compelling array of genes  
706 whose effects may converge to promote internalizing and externalizing behavior. Moreover,  
707 these candidate genes were enriched within two functional pathways that have the capability to  
708 not only guide bHR and bLR rats along a different developmental trajectory, but to set the stage  
709 for a widely-different reactivity to the environment.

710 Due to dependence on older platforms and exclusively male rats, we cannot claim to  
711 have identified all relevant candidates. However, many of our findings have already inspired  
712 promising new avenues of research in our model (128–130). First, the differentially-expressed  
713 genes involved in proliferation, cell differentiation, and growth include many genes that play  
714 different roles across development in association with a variety of cell types. Their full story may  
715 only be fully understood by conducting a more detailed, cell-type specific analysis of the  
716 developmental trajectory of the bHR/bLR hippocampus, along with direct manipulation to assess  
717 relevance to behavioral phenotype. Second, the evidence supporting increased microglial  
718 phagocytosis begs for experiments of a more morphological and dynamic nature, tracking  
719 microglial activation and synaptic pruning under conditions of normal development and  
720 adulthood and under stressful challenge. Finally, our top candidates, Trhr and Ucp2, suggest  
721 that our model could provide insight into long-standing questions regarding the relationship  
722 between the propensity for internalizing and externalizing behaviors and energy metabolism.

### 723 724 **Acknowledgements**

725  
726 The work that was performed at the Molecular Behavioral Neuroscience Institute was  
727 supported by the following grants: Hope for Depression Research Foundation (HDRF; RGA#  
728 DTF Phase II (D) (McEwen- PI)), Pritzker Neuropsychiatric Disorders Research Consortium,  
729 National Institute on Drug Abuse Grants 5P01 DA021633-02, NIDA (5RO1 DA013386), Office of  
730 Naval Research Grant N00014-12-1-0366, Office of Naval Research (ONR) N00014-09-1-0598,  
731 Office of Naval Research (ONR) N00014-02-1-0879, NIMH Conte Center Grant #L99MH60398,  
732 and NIMH Program Project Grant #P01MH42251-01. The University of Alabama study was  
733 funded by NIMH 4R00MH085859-02 (S.M.C.). Research training for I.B. was supported by the  
734 Undergraduate Research Opportunity Program at the University of Michigan. We would also  
735 like to acknowledge everyone involved in the studies included in the meta-analysis: James  
736 Stewart, Angela Koelsch, Sharon Burke, Mary Hoverstein, Jennifer Fitzpatrick, Hui Li, FeiLi, and  
737 Amy Tang, Elaine Hebda-Bauer, the University of Michigan Advanced Genomics Core, and  
738 HudsonAlpha Institute for Biotechnology Genomics Services Lab. Finally, we thank everyone  
739 who has provided feedback on the manuscript: Dr. Shelly  
740 Flagel, Alek Pankonin, Pouya Mandi Gholami, Dr. Aram Parsegian, and Leah Johnson.

741



## Works Cited

- 742  
743  
744 1. Substance Abuse and Mental Health Services Administration (2017): Mental and Substance  
745 Use Disorders. Text. Retrieved June 1, 2018, from <https://www.samhsa.gov/disorders>.  
746 2. The National Institute of Mental Health Information Resource Center (2017): NIMH: Health  
747 Information > Statistics > Any Mood Disorder. . Retrieved June 1, 2018, from  
748 <https://www.nimh.nih.gov/health/statistics/any-mood-disorder.shtml>.  
749 3. Krueger RF, Markon KE (2006): Reinterpreting comorbidity: a model-based approach to  
750 understanding and classifying psychopathology. *Annu Rev Clin Psychol.* 2: 111–133.  
751 4. Smoller JW (2016): The Genetics of Stress-Related Disorders: PTSD, Depression, and  
752 Anxiety Disorders. *Neuropsychopharmacology.* 41: 297–319.  
753 5. Wray NR, Ripke S, Mattheisen M, Trzaskowski M, Byrne EM, Abdellaoui A, *et al.* (2018):  
754 Genome-wide association analyses identify 44 risk variants and refine the genetic  
755 architecture of major depression. *Nat Genet.* 50: 668–681.  
756 6. Aydin C, Frohmader K, Akil H (2015): Revealing a latent variable: individual differences in  
757 affective response to repeated injections. *Behav Neurosci.* 129: 679–682.  
758 7. Chaudhury S, Aurbach EL, Sharma V, Blandino P, Turner CA, Watson SJ, Akil H (2014):  
759 FGF2 is a target and a trigger of epigenetic mechanisms associated with differences in  
760 emotionality: Partnership with H3K9me3. *Proc Natl Acad Sci U S A.* 111: 11834–11839.  
761 8. Clinton SM, Vazquez DM, Kabbaj M, Kabbaj M-H, Watson SJ, Akil H (2007): Individual  
762 differences in novelty-seeking and emotional reactivity correlate with variation in  
763 maternal behavior. *Horm Behav.* 51: 655–664.  
764 9. Flagel SB, Robinson TE, Clark JJ, Clinton SM, Watson SJ, Seeman P, *et al.* (2010): An  
765 animal model of genetic vulnerability to behavioral disinhibition and responsiveness to  
766 reward-related cues: implications for addiction. *Neuropsychopharmacology.* 35: 388–  
767 400.  
768 10. Flagel SB, Waselus M, Clinton SM, Watson SJ, Akil H (2014): Antecedents and  
769 consequences of drug abuse in rats selectively bred for high and low response to  
770 novelty. *Neuropharmacology.* 76 Pt B: 425–436.  
771 11. Perez JA, Clinton SM, Turner CA, Watson SJ, Akil H (2009): A New Role for FGF2 as an  
772 Endogenous Inhibitor of Anxiety. *J Neurosci.* 29: 6379–6387.  
773 12. Prater KE, Aurbach EL, Larcinese HK, Smith TN, Turner CA, Blandino P, *et al.* (2017):  
774 Selectively Bred Rats Provide a Unique Model of Vulnerability to PTSD-Like Behavior  
775 and Respond Differentially to FGF2 Augmentation Early in Life.  
776 *Neuropsychopharmacology.* 42: 1706–1714.  
777 13. Stead JDH, Clinton S, Neal C, Schneider J, Jama A, Miller S, *et al.* (2006): Selective  
778 breeding for divergence in novelty-seeking traits: Heritability and enrichment in  
779 spontaneous anxiety-related behaviors. *Behav Genet.* 36: 697–712.  
780 14. Stedenfeld KA, Clinton SM, Kerman IA, Akil H, Watson SJ, Sved AF (2011): Novelty-  
781 seeking behavior predicts vulnerability in a rodent model of depression. *Physiol Behav.*  
782 103: 210–216.  
783 15. Turner CA, Clinton SM, Thompson RC, Watson SJ, Akil H (2011): Fibroblast growth factor-2  
784 (FGF2) augmentation early in life alters hippocampal development and rescues the  
785 anxiety phenotype in vulnerable animals. *Proc Natl Acad Sci U S A.* 108: 8021–8025.  
786 16. Clinton SM, Stead JDH, Miller S, Watson SJ, Akil H (2011): Developmental underpinnings of  
787 differences in rodent novelty-seeking and emotional reactivity. *Eur J Neurosci.* 34: 994–  
788 1005.  
789 17. Turner CA, Hagenauer MH, Aurbach EL, Maras PM, Fournier CL, Blandino P, *et al.* (2019):  
790 Effects of early-life FGF2 on ultrasonic vocalizations (USVs) and the mu-opioid receptor  
791 in male Sprague-Dawley rats selectively-bred for differences in their response to novelty.  
792 *Brain Res.* 1715: 106–114.

- 793 18. Robinson JL, Kagan J, Reznick JS, Corley R (1992): The heritability of inhibited and  
794 uninhibited behavior: A twin study. *Developmental Psychology*. 28: 1030–1037.
- 795 19. Turner CA, Flagel SB, Blandino P, Watson SJ, Akil H (2017): Utilizing a unique animal  
796 model to better understand human temperament. *Curr Opin Behav Sci*. 14: 108–114.
- 797 20. Fanselow MS, Dong H-W (2010): Are the dorsal and ventral hippocampus functionally  
798 distinct structures? *Neuron*. 65: 7–19.
- 799 21. Gray JA (1982): *The neuropsychology of anxiety: An enquiry into the functions of the septo-*  
800 *hippocampal system*. The neuropsychology of anxiety: An enquiry into the functions of  
801 the septo-hippocampal system. New York, NY, US: Clarendon Press/Oxford University  
802 Press.
- 803 22. Papez JW (1937): A proposed mechanism of emotion. *Archives of Neurology & Psychiatry*.  
804 38: 725–743.
- 805 23. Campbell S, Macqueen G (2004): The role of the hippocampus in the pathophysiology of  
806 major depression. *J Psychiatry Neurosci*. 29: 417–426.
- 807 24. Gerlach JL, McEwen BS (1972): Rat brain binds adrenal steroid hormone: radioautography  
808 of hippocampus with corticosterone. *Science*. 175: 1133–1136.
- 809 25. Dranovsky A, Hen R (2006): Hippocampal neurogenesis: regulation by stress and  
810 antidepressants. *Biol Psychiatry*. 59: 1136–1143.
- 811 26. Clinton S, Miller S, Watson SJ, Akil H (2008): Prenatal stress does not alter innate novelty-  
812 seeking behavioral traits, but differentially affects individual differences in  
813 neuroendocrine stress responsivity. *Psychoneuroendocrinology*. 33: 162–177.
- 814 27. Kabbaj M, Devine DP, Savage VR, Akil H (2000): Neurobiological correlates of individual  
815 differences in novelty-seeking behavior in the rat: differential expression of stress-related  
816 molecules. *J Neurosci*. 20: 6983–6988.
- 817 28. Zhou Z, Blandino P, Yuan Q, Shen P-H, Hodgkinson CA, Virkkunen M, *et al.* (2019):  
818 Exploratory locomotion, a predictor of addiction vulnerability, is oligogenic in rats  
819 selected for this phenotype. *Proc Natl Acad Sci USA*. 116: 13107–13115.
- 820 29. Aurbach EL, Inui EG, Turner CA, Hagenauer MH, Prater KE, Li JZ, *et al.* (2015): Fibroblast  
821 growth factor 9 is a novel modulator of negative affect. *Proc Natl Acad Sci USA*. 112:  
822 11953–11958.
- 823 30. Clinton SM, Watson SJ, Akil H (2014): High novelty-seeking rats are resilient to negative  
824 physiological effects of the early life stress. *Stress*. 17: 97–107.
- 825 31. Isgor C, Kabbaj M, Akil H, Watson SJ (2004): Delayed effects of chronic variable stress  
826 during peripubertal-juvenile period on hippocampal morphology and on cognitive and  
827 stress axis functions in rats. *Hippocampus*. 14: 636–648.
- 828 32. Irizarry RA, Hobbs B, Collin F, Beazer-Barclay YD, Antonellis KJ, Scherf U, Speed TP  
829 (2003): Exploration, normalization, and summaries of high density oligonucleotide array  
830 probe level data. *Biostatistics*. 4: 249–264.
- 831 33. Hagenauer MH, Schulmann A, Li JZ, Vawter MP, Walsh DM, Thompson RC, *et al.* (2018):  
832 Inference of cell type content from human brain transcriptomic datasets illuminates the  
833 effects of age, manner of death, dissection, and psychiatric diagnosis. *PLoS ONE*. 13:  
834 e0200003.
- 835 34. Re AD (2014): *compute.es: Compute Effect Sizes*. Retrieved May 23, 2018, from  
836 <https://CRAN.R-project.org/package=compute.es>.
- 837 35. Trapnell C, Roberts A, Goff L, Pertea G, Kim D, Kelley DR, *et al.* (2012): Differential gene  
838 and transcript expression analysis of RNA-seq experiments with TopHat and Cufflinks.  
839 *Nat Protoc*. 7: 562–578.
- 840 36. Viechtbauer W (2010): Conducting Meta-Analyses in R with The metafor Package. *Journal*  
841 *of Statistical Software*. 36. doi: 10.18637/jss.v036.i03.
- 842 37. Pollard KS, Dudoit S, Laan MJ van der (2005): Multiple Testing Procedures: the multtest  
843 Package and Applications to Genomics. *Bioinformatics and Computational Biology*

- 844            *Solutions Using R and Bioconductor*, Statistics for Biology and Health. Springer, New  
845            York, NY, pp 249–271.
- 846 38. Mootha VK, Lindgren CM, Eriksson K-F, Subramanian A, Sihag S, Lehar J, *et al.* (2003):  
847            PGC-1alpha-responsive genes involved in oxidative phosphorylation are coordinately  
848            downregulated in human diabetes. *Nat Genet.* 34: 267–273.
- 849 39. Subramanian A, Tamayo P, Mootha VK, Mukherjee S, Ebert BL, Gillette MA, *et al.* (2005):  
850            Gene set enrichment analysis: a knowledge-based approach for interpreting genome-  
851            wide expression profiles. *Proc Natl Acad Sci USA.* 102: 15545–15550.
- 852 40. Sergushichev A (2016): An algorithm for fast preranked gene set enrichment analysis using  
853            cumulative statistic calculation. *bioRxiv.* . doi: 10.1101/060012.
- 854 41. Powell JAC (2014): GO2MSIG, an automated GO based multi-species gene set generator  
855            for gene set enrichment analysis. *BMC Bioinformatics.* 15: 146.
- 856 42. Johnson MR, Shkura K, Langley SR, Delahaye-Duriez A, Srivastava P, Hill WD, *et al.*  
857            (2016): Systems genetics identifies a convergent gene network for cognition and  
858            neurodevelopmental disease. *Nat Neurosci.* 19: 223–232.
- 859 43. Park CC, Gale GD, de Jong S, Ghazalpour A, Bennett BJ, Farber CR, *et al.* (2011): Gene  
860            networks associated with conditional fear in mice identified using a systems genetics  
861            approach. *BMC Syst Biol.* 5: 43.
- 862 44. Cembrowski MS, Wang L, Sugino K, Shields BC, Spruston N (2016): Hipposeq: a  
863            comprehensive RNA-seq database of gene expression in hippocampal principal  
864            neurons. *Elife.* 5: e14997.
- 865 45. Szklarczyk D, Franceschini A, Wyder S, Forslund K, Heller D, Huerta-Cepas J, *et al.* (2015):  
866            STRING v10: protein-protein interaction networks, integrated over the tree of life. *Nucleic*  
867            *Acids Res.* 43: D447-452.
- 868 46. De Preter K, Barriot R, Speleman F, Vandesompele J, Moreau Y (2008): Positional gene  
869            enrichment analysis of gene sets for high-resolution identification of overrepresented  
870            chromosomal regions. *Nucleic Acids Res.* 36: e43.
- 871 47. Carlson M (2017): *org.Rn.eg.db: Genome wide annotation for Rat.* R package. Retrieved  
872            May 23, 2018, from <http://bioconductor.org/packages/org.Rn.eg.db/>.
- 873 48. Shimoyama M, De Pons J, Hayman GT, Laulederkind SJF, Liu W, Nigam R, *et al.* (2015):  
874            The Rat Genome Database 2015: genomic, phenotypic and environmental variations  
875            and disease. *Nucleic Acids Res.* 43: D743-750.
- 876 49. Livak KJ, Schmittgen TD (2001): Analysis of relative gene expression data using real-time  
877            quantitative PCR and the 2(-Delta Delta C(T)) Method. *Methods.* 25: 402–408.
- 878 50. Yuan JS, Reed A, Chen F, Stewart CN (2006): Statistical analysis of real-time PCR data.  
879            *BMC Bioinformatics.* 7: 85.
- 880 51. Calvo N, Cecchi M, Kabbaj M, Watson SJ, Akil H (2011): Differential effects of social defeat  
881            in rats with high and low locomotor response to novelty. *Neuroscience.* 183: 81–89.
- 882 52. Kabbaj M, Evans S, Watson SJ, Akil H (2004): The search for the neurobiological basis of  
883            vulnerability to drug abuse: using microarrays to investigate the role of stress and  
884            individual differences. *Neuropharmacology.* 47 Suppl 1: 111–122.
- 885 53. Albert FW, Carlborg O, Plyusnina I, Besnier F, Hedwig D, Lautenschläger S, *et al.* (2009):  
886            Genetic architecture of tameness in a rat model of animal domestication. *Genetics.* 182:  
887            541–554.
- 888 54. Terenina-Rigaldie E, Moisan M-P, Colas A, Beaugé F, Shah KV, Jones BC, Mormède P  
889            (2003): Genetics of behaviour: phenotypic and molecular study of rats derived from high-  
890            and low-alcohol consuming lines. *Pharmacogenetics.* 13: 543–554.
- 891 55. Conti LH, Jirout M, Breen L, Vanella JJ, Schork NJ, Printz MP (2004): Identification of  
892            quantitative trait Loci for anxiety and locomotion phenotypes in rat recombinant inbred  
893            strains. *Behav Genet.* 34: 93–103.

- 894 56. Baum AE, Solberg LC, Churchill GA, Ahmadiyah N, Takahashi JS, Redei EE (2006): Test-  
895 and behavior-specific genetic factors affect WKY hypoactivity in tests of emotionality.  
896 *Behav Brain Res.* 169: 220–230.
- 897 57. Johannesson M, Lopez-Aumatell R, Stridh P, Diez M, Tuncel J, Blázquez G, *et al.* (2009): A  
898 resource for the simultaneous high-resolution mapping of multiple quantitative trait loci in  
899 rats: the NIH heterogeneous stock. *Genome Res.* 19: 150–158.
- 900 58. Fernández-Teruel A, Escorihuela RM, Gray JA, Aguilar R, Gil L, Giménez-Llort L, *et al.*  
901 (2002): A quantitative trait locus influencing anxiety in the laboratory rat. *Genome Res.*  
902 12: 618–626.
- 903 59. Solberg LC, Baum AE, Ahmadiyah N, Shimomura K, Li R, Turek FW, *et al.* (2006): Genetic  
904 analysis of the stress-responsive adrenocortical axis. *Physiol Genomics.* 27: 362–369.
- 905 60. Yamazato M, Ohya Y, Nakamoto M, Sakima A, Tagawa T, Harada Y, *et al.* (2006):  
906 Sympathetic hyperreactivity to air-jet stress in the chromosome 1 blood pressure  
907 quantitative trait locus congenic rats. *Am J Physiol Regul Integr Comp Physiol.* 290:  
908 R709-714.
- 909 61. Llamas B, Contesse V, Guyonnet-Duperat V, Vaudry H, Mormède P, Moisan M-P (2005):  
910 QTL mapping for traits associated with stress neuroendocrine reactivity in rats. *Mamm*  
911 *Genome.* 16: 505–515.
- 912 62. Solberg LC, Baum AE, Ahmadiyah N, Shimomura K, Li R, Turek FW, *et al.* (2004): Sex- and  
913 lineage-specific inheritance of depression-like behavior in the rat. *Mamm Genome.* 15:  
914 648–662.
- 915 63. Du R-H, Wu F-F, Lu M, Shu X-D, Ding J-H, Wu G, Hu G (2016): Uncoupling protein 2  
916 modulation of the NLRP3 inflammasome in astrocytes and its implications in depression.  
917 *Redox Biol.* 9: 178–187.
- 918 64. Gimsa U, Kanitz E, Otten W, Aheng C, Tuchscherer M, Ricquier D, *et al.* (2011): Alterations  
919 in anxiety-like behavior following knockout of the uncoupling protein 2 (*ucp2*) gene in  
920 mice. *Life Sci.* 89: 677–684.
- 921 65. Pekary AE, Sattin A, Lloyd RL (2015): Ketamine modulates TRH and TRH-like peptide  
922 turnover in brain and peripheral tissues of male rats. *Peptides.* 69: 66–76.
- 923 66. Sun X-L, Liu Y, Dai T, Ding J-H, Hu G (2011): Uncoupling protein 2 knockout exacerbates  
924 depression-like behaviors in mice via enhancing inflammatory response. *Neuroscience.*  
925 192: 507–514.
- 926 67. Wang D, Zhai X, Chen P, Yang M, Zhao J, Dong J, Liu H (2014): Hippocampal UCP2 is  
927 essential for cognition and resistance to anxiety but not required for the benefits of  
928 exercise. *Neuroscience.* 277: 36–44.
- 929 68. Zeng H, Schimpf BA, Rohde AD, Pavlova MN, Gragerov A, Bergmann JE (2007):  
930 Thyrotropin-releasing hormone receptor 1-deficient mice display increased depression  
931 and anxiety-like behavior. *Mol Endocrinol.* 21: 2795–2804.
- 932 69. Xiao B, Harada Y, Kawakami K, Nabika T (2011): A 1.8-Mbp fragment on chromosome 1  
933 affects sympathetic response to stress: evaluation in reciprocal congenic strains  
934 between stroke-prone spontaneously hypertensive rat and Wistar-Kyoto rat. *J*  
935 *Hypertens.* 29: 257–265.
- 936 70. Klimes I, Weston K, Gasperiková D, Kovács P, Kvetnanský R, Jezová D, *et al.* (2005):  
937 Mapping of genetic determinants of the sympathoneural response to stress. *Physiol*  
938 *Genomics.* 20: 183–187.
- 939 71. Potenza MN, Brodtkin ES, Joe B, Luo X, Remmers EF, Wilder RL, *et al.* (2004): Genomic  
940 regions controlling corticosterone levels in rats. *Biol Psychiatry.* 55: 634–641.
- 941 72. Belvindrah R, Rougon G, Chazal G (2002): Increased neurogenesis in adult mCD24-  
942 deficient mice. *J Neurosci.* 22: 3594–3607.
- 943 73. Cerezo A, Guadamillas MC, Goetz JG, Sánchez-Perales S, Klein E, Assoian RK, del Pozo  
944 MA (2009): The absence of caveolin-1 increases proliferation and anchorage-

- 945 independent growth by a Rac-dependent, Erk-independent mechanism. *Mol Cell Biol.*  
946 29: 5046–5059.
- 947 74. Galach M (2014): Molecular mechanisms involved in epithelial differentiation of human  
948 induced pluripotent stem cells. Dissertation. doi: DOI:10.11588/heidok.00017870.
- 949 75. Head BP, Peart JN, Panneerselvam M, Yokoyama T, Pearn ML, Niesman IR, *et al.* (2010):  
950 Loss of caveolin-1 accelerates neurodegeneration and aging. *PLoS ONE.* 5: e15697.
- 951 76. Hossain MB, Shifat R, Li J, Luo X, Hess KR, Rivera-Molina Y, *et al.* (2017): TIE2 Associates  
952 with Caveolae and Regulates Caveolin-1 To Promote Their Nuclear Translocation. *Mol*  
953 *Cell Biol.* 37. doi: 10.1128/MCB.00142-17.
- 954 77. Jo A, Denduluri S, Zhang B, Wang Z, Yin L, Yan Z, *et al.* (2014): The versatile functions of  
955 Sox9 in development, stem cells, and human diseases. *Genes Dis.* 1: 149–161.
- 956 78. Li X-L, Liu L, Li D-D, He Y-P, Guo L-H, Sun L-P, *et al.* (2017): Integrin  $\beta 4$  promotes cell  
957 invasion and epithelial-mesenchymal transition through the modulation of Slug  
958 expression in hepatocellular carcinoma. *Sci Rep.* 7: 40464.
- 959 79. Liu C, Goswami M, Talley J, Chesser-Martinez PL, Lou C-H, Sater AK (2012): TAK1  
960 promotes BMP4/Smad1 signaling via inhibition of erk MAPK: a new link in the FGF/BMP  
961 regulatory network. *Differentiation.* 83: 210–219.
- 962 80. Panaliappan TK, Wittmann W, Jidigam VK, Mercurio S, Bertolini JA, Sghari S, *et al.* (2018):  
963 Sox2 is required for olfactory pit formation and olfactory neurogenesis through BMP  
964 restriction and Hes5 upregulation. *Development.* 145. doi: 10.1242/dev.153791.
- 965 81. Poché RA, Furuta Y, Chaboissier M-C, Schedl A, Behringer RR (2008): Sox9 is expressed  
966 in mouse multipotent retinal progenitor cells and functions in Müller glial cell  
967 development. *J Comp Neurol.* 510: 237–250.
- 968 82. Shakiba N, White CA, Lipsitz YY, Yachie-Kinoshita A, Tonge PD, Hussein SMI, *et al.* (2015):  
969 CD24 tracks divergent pluripotent states in mouse and human cells. *Nat Commun.* 6:  
970 7329.
- 971 83. Stolt CC, Lommes P, Sock E, Chaboissier M-C, Schedl A, Wegner M (2003): The Sox9  
972 transcription factor determines glial fate choice in the developing spinal cord. *Genes*  
973 *Dev.* 17: 1677–1689.
- 974 84. Suzuki Y, Montagne K, Nishihara A, Watabe T, Miyazono K (2008): BMPs promote  
975 proliferation and migration of endothelial cells via stimulation of VEGF-A/VEGFR2 and  
976 angiopoietin-1/Tie2 signalling. *J Biochem.* 143: 199–206.
- 977 85. Lein ES, Hawrylycz MJ, Ao N, Ayres M, Bensinger A, Bernard A, *et al.* (2007): Genome-  
978 wide atlas of gene expression in the adult mouse brain. *Nature.* 445: 168–176.
- 979 86. Oldham MC, Konopka G, Iwamoto K, Langfelder P, Kato T, Horvath S, Geschwind DH  
980 (2008): Functional organization of the transcriptome in human brain. *Nat Neurosci.* 11:  
981 1271–1282.
- 982 87. Fontanet PA, Ríos AS, Alsina FC, Paratcha G, Ledda F (2018): Pea3 Transcription Factors,  
983 Etv4 and Etv5, Are Required for Proper Hippocampal Dendrite Development and  
984 Plasticity. *Cereb Cortex.* 28: 236–249.
- 985 88. Jaworski JN, Jones DC (2006): The role of CART in the reward/reinforcing properties of  
986 psychostimulants. *Peptides.* 27: 1993–2004.
- 987 89. Young LJ, Wang Z (2004): The neurobiology of pair bonding. *Nat Neurosci.* 7: 1048–1054.
- 988 90. Higa KK, Young JW, Ji B, Nichols DE, Geyer MA, Zhou X (2017): Striatal dopamine D1  
989 receptor suppression impairs reward-associative learning. *Behav Brain Res.* 323: 100–  
990 110.
- 991 91. Milienne-Petiot M, Groenink L, Minassian A, Young JW (2017): Blockade of dopamine D1-  
992 family receptors attenuates the mania-like hyperactive, risk-preferring, and high  
993 motivation behavioral profile of mice with low dopamine transporter levels. *J*  
994 *Psychopharmacol (Oxford).* 31: 1334–1346.

- 995 92. Kettenmann H, Kirchhoff F, Verkhratsky A (2013): Microglia: new roles for the synaptic  
996 stripper. *Neuron*. 77: 10–18.
- 997 93. Zeisel A, Hochgerner H, Lonnerberg P, Johnsson A, Memic F, Zwan J van der, *et al.* (2018):  
998 Molecular architecture of the mouse nervous system. *bioRxiv*. 294918.
- 999 94. Fischer S, Ehlert U (2018): Hypothalamic-pituitary-thyroid (HPT) axis functioning in anxiety  
1000 disorders. A systematic review. *Depress Anxiety*. 35: 98–110.
- 1001 95. Maes M, Vandewoude M, Maes L, Schotte C, Cosyns P (1989): A revised interpretation of  
1002 the TRH test results in female depressed patients. Part I: TSH responses. Effects of  
1003 severity of illness, thyroid hormones, monoamines, age, sex hormonal, corticosteroid  
1004 and nutritional state. *J Affect Disord*. 16: 203–213.
- 1005 96. Lanni A, Moreno M, Lombardi A, Goglia F (2003): Thyroid hormone and uncoupling  
1006 proteins. *FEBS Lett*. 543: 5–10.
- 1007 97. Cichon S, Mühleisen TW, Degenhardt FA, Mattheisen M, Miró X, Strohmaier J, *et al.* (2011):  
1008 Genome-wide association study identifies genetic variation in neurocan as a  
1009 susceptibility factor for bipolar disorder. *Am J Hum Genet*. 88: 372–381.
- 1010 98. Miró X, Meier S, Dreisow ML, Frank J, Strohmaier J, Breuer R, *et al.* (2012): Studies in  
1011 humans and mice implicate neurocan in the etiology of mania. *Am J Psychiatry*. 169:  
1012 982–990.
- 1013 99. Rauch U, Feng K, Zhou XH (2001): Neurocan: a brain chondroitin sulfate proteoglycan. *Cell*  
1014 *Mol Life Sci*. 58: 1842–1856.
- 1015 100. Brooker SM, Gobeske KT, Chen J, Peng C-Y, Kessler JA (2017): Hippocampal bone  
1016 morphogenetic protein signaling mediates behavioral effects of antidepressant  
1017 treatment. *Mol Psychiatry*. 22: 910–919.
- 1018 101. Caronia G, Wilcoxon J, Feldman P, Grove EA (2010): Bone morphogenetic protein  
1019 signaling in the developing telencephalon controls formation of the hippocampal dentate  
1020 gyrus and modifies fear-related behavior. *J Neurosci*. 30: 6291–6301.
- 1021 102. Cole AE, Murray SS, Xiao J (2016): Bone Morphogenetic Protein 4 Signalling in Neural  
1022 Stem and Progenitor Cells during Development and after Injury. *Stem Cells Int*. 2016:  
1023 9260592.
- 1024 103. Harland R (2000): Neural induction. *Curr Opin Genet Dev*. 10: 357–362.
- 1025 104. Bond AM, Bhalala OG, Kessler JA (2012): The dynamic role of bone morphogenetic  
1026 proteins in neural stem cell fate and maturation. *Dev Neurobiol*. 72: 1068–1084.
- 1027 105. Gobeske KT, Das S, Bonaguidi MA, Weiss C, Radulovic J, Disterhoft JF, Kessler JA  
1028 (2009): BMP signaling mediates effects of exercise on hippocampal neurogenesis and  
1029 cognition in mice. *PLoS ONE*. 4: e7506.
- 1030 106. Meyers EA, Gobeske KT, Bond AM, Jarrett JC, Peng C-Y, Kessler JA (2016): Increased  
1031 bone morphogenetic protein signaling contributes to age-related declines in  
1032 neurogenesis and cognition. *Neurobiol Aging*. 38: 164–175.
- 1033 107. Gomes WA, Mehler MF, Kessler JA (2003): Transgenic overexpression of BMP4 increases  
1034 astroglial and decreases oligodendroglial lineage commitment. *Dev Biol*. 255: 164–177.
- 1035 108. García-Fuster MJ, Perez JA, Clinton SM, Watson SJ, Akil H (2010): Impact of cocaine on  
1036 adult hippocampal neurogenesis in an animal model of differential propensity to drug  
1037 abuse. *Eur J Neurosci*. 31: 79–89.
- 1038 109. Ramesh V, Bayam E, Cernilogar FM, Bonapace IM, Schulze M, Riemenschneider MJ, *et*  
1039 *al.* (2016): Loss of Uhrf1 in neural stem cells leads to activation of retroviral elements  
1040 and delayed neurodegeneration. *Genes Dev*. 30: 2199–2212.
- 1041 110. Duman RS, Monteggia LM (2006): A neurotrophic model for stress-related mood disorders.  
1042 *Biol Psychiatry*. 59: 1116–1127.
- 1043 111. Bansod S, Kageyama R, Ohtsuka T (2017): Hes5 regulates the transition timing of  
1044 neurogenesis and gliogenesis in mammalian neocortical development. *Development*.  
1045 144: 3156–3167.

- 1046 112. Sakai D, Suzuki T, Osumi N, Wakamatsu Y (2006): Cooperative action of Sox9, Snail2 and  
1047 PKA signaling in early neural crest development. *Development*. 133: 1323–1333.
- 1048 113. Sun W, Cornwell A, Li J, Peng S, Osorio MJ, Aalling N, *et al.* (2017): SOX9 Is an  
1049 Astrocyte-Specific Nuclear Marker in the Adult Brain Outside the Neurogenic Regions. *J*  
1050 *Neurosci*. 37: 4493–4507.
- 1051 114. Ming G-L, Song H (2011): Adult neurogenesis in the mammalian brain: significant answers  
1052 and significant questions. *Neuron*. 70: 687–702.
- 1053 115. Fuller ML, DeChant AK, Rothstein B, Caprariello A, Wang R, Hall AK, Miller RH (2007):  
1054 Bone morphogenetic proteins promote gliosis in demyelinating spinal cord lesions. *Ann*  
1055 *Neurol*. 62: 288–300.
- 1056 116. Yan H, Zhu X, Xie J, Zhao Y, Liu X (2016):  $\beta$ -amyloid increases neurocan expression  
1057 through regulating Sox9 in astrocytes: A potential relationship between Sox9 and  
1058 chondroitin sulfate proteoglycans in Alzheimer's disease. *Brain Res*. 1646: 377–383.
- 1059 117. Schafer DP, Stevens B (2015): Microglia Function in Central Nervous System  
1060 Development and Plasticity. *Cold Spring Harb Perspect Biol*. 7: a020545.
- 1061 118. Wu Y, Dissing-Olesen L, MacVicar BA, Stevens B (2015): Microglia: Dynamic Mediators of  
1062 Synapse Development and Plasticity. *Trends Immunol*. 36: 605–613.
- 1063 119. Vogler S, Pahnke J, Rousset S, Ricquier D, Moch H, Miroux B, Ibrahim SM (2006):  
1064 Uncoupling protein 2 has protective function during experimental autoimmune  
1065 encephalomyelitis. *Am J Pathol*. 168: 1570–1575.
- 1066 120. Arsenijevic D, Onuma H, Pecqueur C, Raimbault S, Manning BS, Miroux B, *et al.* (2000):  
1067 Disruption of the uncoupling protein-2 gene in mice reveals a role in immunity and  
1068 reactive oxygen species production. *Nat Genet*. 26: 435–439.
- 1069 121. Albus E, Sinnigen K, Winzer M, Thiele S, Baschant U, Hannemann A, *et al.* (2016): Milk  
1070 Fat Globule-Epidermal Growth Factor 8 (MFG-E8) Is a Novel Anti-inflammatory Factor in  
1071 Rheumatoid Arthritis in Mice and Humans. *J Bone Miner Res*. 31: 596–605.
- 1072 122. Spittau B, Rilka J, Steinfath E, Zöller T, Kriegelstein K (2015): TGF $\beta$ 1 increases microglia-  
1073 mediated engulfment of apoptotic cells via upregulation of the milk fat globule-EGF  
1074 factor 8. *Glia*. 63: 142–153.
- 1075 123. Fricker M, Neher JJ, Zhao J-W, Théry C, Tolkovsky AM, Brown GC (2012): MFG-E8  
1076 mediates primary phagocytosis of viable neurons during neuroinflammation. *J Neurosci*.  
1077 32: 2657–2666.
- 1078 124. Fuller AD, Van Eldik LJ (2008): MFG-E8 regulates microglial phagocytosis of apoptotic  
1079 neurons. *J Neuroimmune Pharmacol*. 3: 246–256.
- 1080 125. Jo WK, Zhang Y, Emrich HM, Dietrich DE (2015): Glia in the cytokine-mediated onset of  
1081 depression: fine tuning the immune response. *Front Cell Neurosci*. 9: 268.
- 1082 126. Sato K (2015): Effects of Microglia on Neurogenesis. *Glia*. 63: 1394–1405.
- 1083 127. Mastellos DC (2014): Complement emerges as a masterful regulator of CNS homeostasis,  
1084 neural synaptic plasticity and cognitive function. *Exp Neurol*. 261: 469–474.
- 1085 128. Maras PM, Daugherty J, Hebda-Bauer E, Watson SJ, Akil H (2018): Minocycline treatment  
1086 reduces anxiety- and depressive-like behaviors in a genetic model of internalizing mood  
1087 disorders. *Neuroscience Meeting Planner*. Presented at the Society for Neuroscience,  
1088 San Diego, CA, p Program No. 234.03.
- 1089 129. Hilde KL, Hagenauer MH, Stefanov AV, Birt I, Hebda-Bauer E, Watson SJ, Akil H (2018):  
1090 Mechanisms of hippocampal development: Molecular and cellular phenotypes in the  
1091 selectively bred high-responder/low-responder model of affective disorders.  
1092 *Neuroscience Meeting Planner*. Presented at the Society for Neuroscience, San Diego,  
1093 CA, p Program No. 233.04.
- 1094 130. O'Connor AM, Pardo T, Birt I, Hagenauer MH, Maras PM, Prater KE, *et al.* (2018): The  
1095 hippocampal glycome contributes to behavioural phenotype in a novel rodent model of

- 1096 mood disorders. *Neuroscience Meeting Planner*. Presented at the Society for  
1097 Neuroscience, San Diego, CA, p Program No. 233.01.  
1098 131. Clinton SM, Stead JDH, Miller S, Watson SJ, Akil H (2011): Developmental underpinnings  
1099 of differences in rodent novelty-seeking and emotional reactivity. *Eur J Neurosci*. 34:  
1100 994–1005.  
1101 132. Cohen JL, Glover ME, Pugh PC, Fant AD, Simmons RK, Akil H, *et al.* (2015): Maternal  
1102 Style Selectively Shapes Amygdalar Development and Social Behavior in Rats  
1103 Genetically Prone to High Anxiety. *Dev Neurosci*. 37: 203–214.  
1104



### Tables and Table Legends

|                           | MBNI_AffymetrixRae230_F4            | MBNI_AffymetrixRgU34A_F6                  | MBNI_AffymetrixRae230_F15           | MBNI_IlluminaRatRef12v1_F15    | MBNI_RNASeq_F29   | Alabama_Nimblegen_F34                | MBNI_RNASeq_F37    | MBNI_RNASeq_F43                      |
|---------------------------|-------------------------------------|-------------------------------------------|-------------------------------------|--------------------------------|-------------------|--------------------------------------|--------------------|--------------------------------------|
| <b>Generation</b>         | 4                                   | 6                                         | 15                                  | 15                             | 29                | 34                                   | 37                 | 43                                   |
| <b>Laboratory</b>         | MBNI                                | MBNI                                      | MBNI                                | MBNI                           | MBNI              | Alabama                              | MBNI               | MBNI                                 |
| <b>Lead Scientist</b>     | Dr. John Stead                      | Dr. Sarah Clinton                         | Dr. Sarah Clinton                   | Dr. Sarah Clinton              | Dr. Sarah Clinton | Dr. Sarah Clinton                    | Dr. Peter Blandino | Dr. Cigdem Aydin                     |
| <b>Age</b>                | Adult                               | P7, P14, P21                              | P14                                 | P14                            | P14, Adult        | P7, P14, P21, Adult                  | Adult              | Adult                                |
| <b>n per group</b>        | 6                                   | 6                                         | 6                                   | 6                              | 2                 | 5                                    | 6                  | 5                                    |
| <b>Platform</b>           | Affymetrix Rat Expression Set 230 A | Affymetrix Rat Genome (RG) U34A GeneChips | Affymetrix Rat Expression Set 230 A | Illumina RatRef- 12v1 Beadchip | RNA-Seq           | NimbleGen Rat Gene Expression 12x135 | RNA-Seq            | RNA-Seq                              |
| <b>Tissue Extraction</b>  | Whole Hippocampus                   | Whole Hippocampus                         | Whole Hippocampus                   | Whole Hippocampus              | Whole Hippocampus | Dorsal Hippocampus Tissue Punch      | Whole Hippocampus  | Whole Hippocampus                    |
| <b>Exposure</b>           | Basal                               | Basal                                     | Basal                               | Basal                          | Basal             | Basal                                | Basal              | Vehicle Injections                   |
| <b>Behavioral Testing</b> | Basal                               | Basal                                     | Basal                               | Basal                          | Basal             | Basal                                | Locomotor, Anxiety | Social Interaction After Mild Stress |
| <b>Data Release</b>       | TBA                                 | GSE29552                                  | TBA                                 | TBA                            | TBA               | GSE88874                             | TBA                | TBA                                  |
| <b>Citation</b>           |                                     | Clinton <i>et al.</i> 2011                |                                     |                                |                   | Cohen <i>et al.</i> 2015             |                    |                                      |

**Table 1. An overview of the eight transcriptional profiling studies included in our current meta-analyses of differential gene expression in the bHR and bLR hippocampus at four developmental time points: P7, P14, P21, and adulthood. Citations: (131, 132)**

Running Head: bHR vs. bLR Hippocampal Gene Expression Meta-Analysis

| Adult Meta-Analysis: Top Results (FDR<0.05) |             |          |          |          |               |      |             |          |          |          |               |
|---------------------------------------------|-------------|----------|----------|----------|---------------|------|-------------|----------|----------|----------|---------------|
| Rank                                        | Gene Symbol | P-value  | FDR      | Estimate | # of Datasets | Rank | Gene Symbol | P-value  | FDR      | Estimate | # of Datasets |
| 1                                           | Tmem144     | 3.04E-08 | 4.95E-04 | -3.57    | 3             | 38   | Trappc6a    | 6.16E-05 | 2.61E-02 | -2.06    | 3             |
| 2                                           | Asb15       | 4.05E-07 | 2.32E-03 | 2.82     | 3             | 39   | Cav1        | 6.47E-05 | 2.61E-02 | 1.37     | 5             |
| 3                                           | Kif15       | 4.27E-07 | 2.32E-03 | -2.21    | 4             | 40   | Robo3       | 6.54E-05 | 2.61E-02 | -2.00    | 3             |
| 4                                           | Pkhd1l1     | 6.13E-07 | 2.49E-03 | -3.17    | 3             | 41   | C1qa        | 6.57E-05 | 2.61E-02 | -1.40    | 5             |
| 5                                           | Car9        | 7.87E-07 | 2.56E-03 | 2.78     | 3             | 42   | Tubg1       | 6.88E-05 | 2.65E-02 | -1.40    | 5             |
| 6                                           | Klhl34      | 1.04E-06 | 2.81E-03 | -2.39    | 4             | 43   | Zfp952      | 7.17E-05 | 2.65E-02 | 2.12     | 2             |
| 7                                           | Mvb12b      | 2.03E-06 | 4.32E-03 | -2.95    | 2             | 44   | Slc9a3r1    | 7.31E-05 | 2.65E-02 | 1.32     | 5             |
| 8                                           | Amer2       | 2.12E-06 | 4.32E-03 | 2.10     | 3             | 45   | Egfem1      | 7.45E-05 | 2.65E-02 | -2.11    | 2             |
| 9                                           | Rpl17       | 2.86E-06 | 5.17E-03 | -2.16    | 4             | 46   | Epb41l4a    | 7.49E-05 | 2.65E-02 | -2.10    | 2             |
| 10                                          | Nudt4       | 4.27E-06 | 6.51E-03 | -1.58    | 5             | 47   | Trmt10a     | 8.18E-05 | 2.83E-02 | -1.75    | 3             |
| 11                                          | Pkib        | 4.40E-06 | 6.51E-03 | 1.70     | 5             | 48   | Oard1       | 8.81E-05 | 2.98E-02 | 1.65     | 3             |
| 12                                          | Fxyd7       | 5.22E-06 | 6.62E-03 | -1.74    | 4             | 49   | Selenop     | 1.00E-04 | 3.33E-02 | 2.21     | 2             |
| 13                                          | Scube2      | 5.29E-06 | 6.62E-03 | -2.68    | 2             | 50   | Ezr         | 1.17E-04 | 3.72E-02 | 1.27     | 5             |
| 14                                          | Ddx20       | 5.77E-06 | 6.62E-03 | -1.93    | 4             | 51   | Acox3       | 1.17E-04 | 3.72E-02 | 1.26     | 5             |
| 15                                          | R3hdm4      | 6.10E-06 | 6.62E-03 | -2.03    | 3             | 52   | Ints8       | 1.21E-04 | 3.74E-02 | 2.11     | 2             |
| 16                                          | Hmgn5b      | 7.33E-06 | 6.94E-03 | 2.60     | 2             | 53   | Pld4        | 1.22E-04 | 3.74E-02 | -1.45    | 4             |
| 17                                          | Slc39a12    | 7.35E-06 | 6.94E-03 | 2.62     | 3             | 54   | Ucp2        | 1.27E-04 | 3.83E-02 | 1.29     | 5             |
| 18                                          | Acss2       | 7.68E-06 | 6.94E-03 | -1.87    | 4             | 55   | Rbm3        | 1.29E-04 | 3.83E-02 | -1.52    | 4             |
| 19                                          | Rhpn2       | 8.16E-06 | 6.98E-03 | 2.33     | 3             | 56   | Ankdd1b     | 1.37E-04 | 3.93E-02 | -2.00    | 2             |
| 20                                          | Exosc7      | 9.65E-06 | 7.85E-03 | 1.80     | 4             | 57   | Aar2        | 1.38E-04 | 3.93E-02 | 2.02     | 2             |
| 21                                          | Rnls        | 1.04E-05 | 8.06E-03 | 1.92     | 3             | 58   | Fn3k        | 1.42E-04 | 3.97E-02 | -1.47    | 4             |
| 22                                          | Slc19a3     | 1.50E-05 | 1.11E-02 | -2.36    | 3             | 59   | Slc27a1     | 1.45E-04 | 4.01E-02 | 1.24     | 5             |
| 23                                          | Prss55      | 1.91E-05 | 1.35E-02 | -2.43    | 2             | 60   | Afmid       | 1.52E-04 | 4.11E-02 | 1.98     | 2             |
| 24                                          | Apln        | 2.07E-05 | 1.41E-02 | 1.48     | 5             | 61   | Slc4a11     | 1.54E-04 | 4.11E-02 | -1.78    | 3             |
| 25                                          | Mfge8       | 2.70E-05 | 1.73E-02 | 1.50     | 5             | 62   | Zfp110      | 1.64E-04 | 4.31E-02 | 1.24     | 5             |
| 26                                          | C2cd3       | 2.84E-05 | 1.73E-02 | 2.06     | 3             | 63   | Tek         | 1.70E-04 | 4.33E-02 | -1.79    | 3             |
| 27                                          | Dnaaf3      | 2.87E-05 | 1.73E-02 | -2.51    | 2             | 64   | Fmo5        | 1.70E-04 | 4.33E-02 | 1.42     | 4             |
| 28                                          | Etv4        | 3.30E-05 | 1.92E-02 | 2.02     | 3             | 65   | Blvra       | 1.74E-04 | 4.36E-02 | 1.52     | 4             |
| 29                                          | Tmem2       | 3.72E-05 | 1.99E-02 | -2.29    | 2             | 66   | Prdm5       | 2.03E-04 | 4.94E-02 | -1.76    | 3             |
| 30                                          | Tdg         | 3.84E-05 | 1.99E-02 | -1.38    | 5             | 67   | Samd5       | 2.09E-04 | 4.94E-02 | 1.95     | 3             |
| 31                                          | Mki67       | 4.03E-05 | 1.99E-02 | -2.01    | 3             | 68   | Ntn4        | 2.10E-04 | 4.94E-02 | 1.94     | 2             |
| 32                                          | Tnnt1       | 4.06E-05 | 1.99E-02 | -1.51    | 5             | 69   | Chd1l       | 2.11E-04 | 4.94E-02 | 1.45     | 4             |
| 33                                          | Zfp90       | 4.13E-05 | 1.99E-02 | -1.59    | 4             | 70   | Ccdc137     | 2.13E-04 | 4.94E-02 | 1.97     | 2             |
| 34                                          | LOC363337   | 4.16E-05 | 1.99E-02 | -2.82    | 2             | 71   | Trhr        | 2.16E-04 | 4.94E-02 | 1.19     | 5             |
| 35                                          | Uhrf1       | 4.95E-05 | 2.29E-02 | -1.67    | 3             | 72   | Zfp821      | 2.22E-04 | 4.98E-02 | -1.48    | 3             |
| 36                                          | Tuba8       | 5.06E-05 | 2.29E-02 | -1.44    | 4             | 73   | Myh6        | 2.23E-04 | 4.98E-02 | -1.25    | 5             |
| 37                                          | Rltpr       | 5.58E-05 | 2.45E-02 | -2.28    | 2             | 74   | Sp3         | 2.26E-04 | 4.98E-02 | 1.93     | 3             |

| P7: Top Result (FDR<0.05) |             |          |          |          |               | P14: Top Result (FDR<0.15) |             |          |          |          |               |
|---------------------------|-------------|----------|----------|----------|---------------|----------------------------|-------------|----------|----------|----------|---------------|
| Rank                      | Gene Symbol | P-value  | FDR      | Estimate | # of Datasets | Rank                       | Gene Symbol | P-value  | FDR      | Estimate | # of Datasets |
| 1                         | Ncan        | 1.38E-07 | 4.86E-04 | -4.16    | 2             | 1                          | Bmp4        | 9.40E-06 | 1.47E-01 | -1.49    | 5             |

**Table 2. The top differentially expressed genes within the bHR/bLR hippocampal gene expression meta-analyses.** P-value=nominal p-value, FDR=false detection rate, Estimate=estimated effect size (i.e., the difference in expression between bHR and bLR rats in units of standard deviation, green/positive=higher expression in bHRs, red/negative= higher expression in bLRs), # of datasets=number of datasets included in the meta-analysis for that gene.

## Figures and Figure Legends

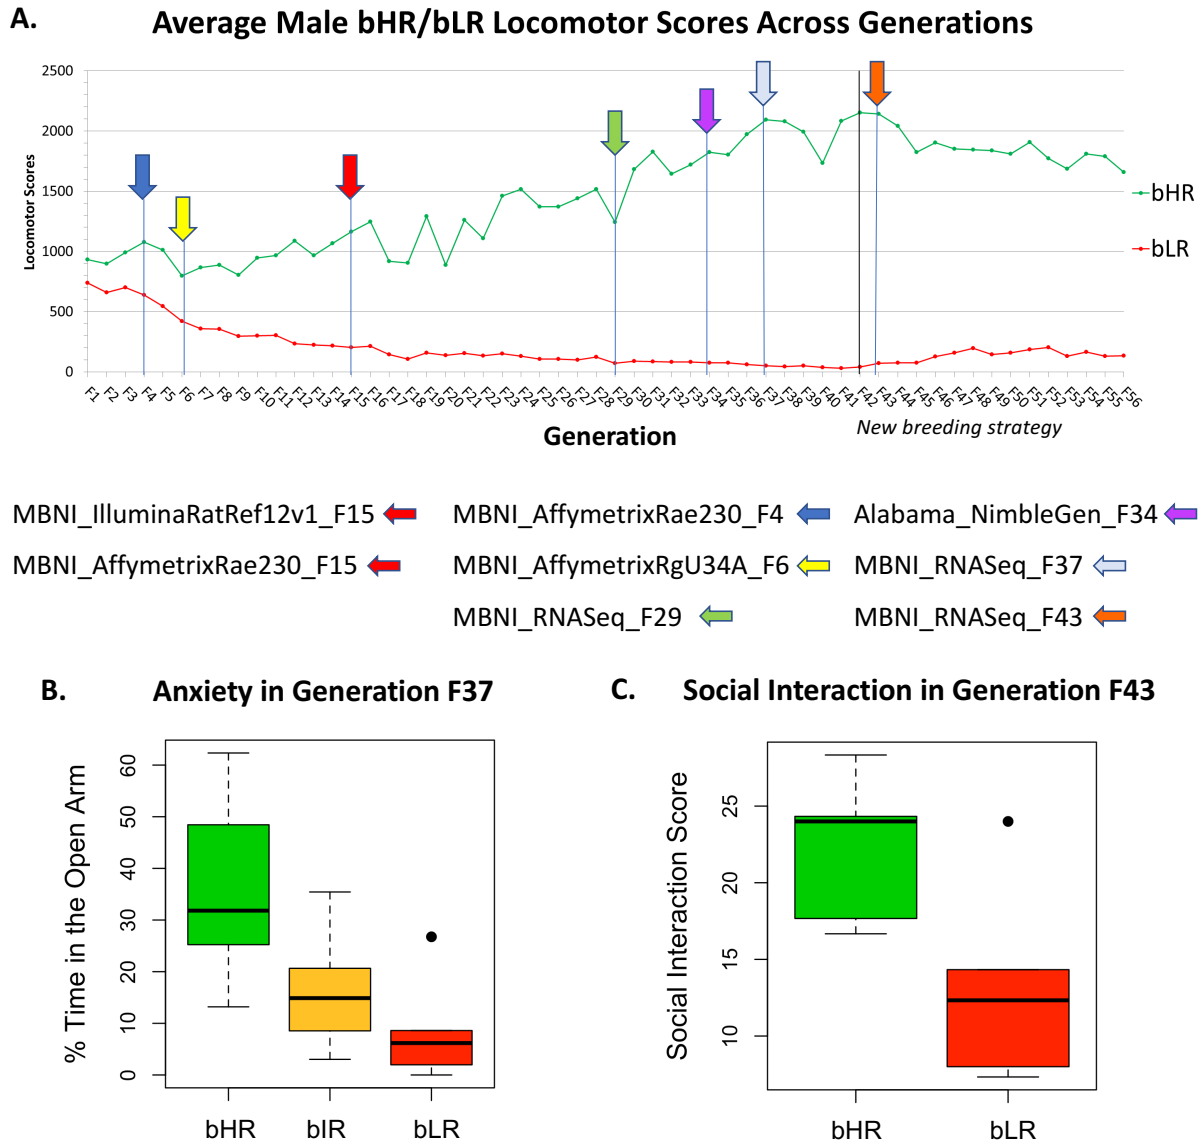

**Figure 1. Selectively-bred high responder (bHR) and low responder (bLR) rats model an extreme propensity for internalizing vs. externalizing behavior. A)** Over the course of 56 generations of selective breeding (F1-F56), the bHR rats (green) have developed increasingly elevated exploratory activity in a novel field (*y-axis*: average total locomotor score), whereas the bLR rats (red) have become less exploratory. These trends plateaued after F42, when our breeding strategy changed to decelerate divergence. Arrows indicate the generations during which hippocampal transcriptomic profiling datasets were collected, along with a name indicating the respective laboratory, platform, and generation for each dataset. **B)** bLR rats have been highly anxious since the initiation of our breeding colony. The example above is from the behavioral data accompanying the MBNI\_RNASeq\_F37 transcriptomic dataset showing bLRs spending a smaller percentage of time in the anxiogenic open arms of the elevated plus maze than bHR rats (effect of phenotype:  $p < 0.01$ , boxes=first quartile, median, and third quartile,

Running Head: bHR vs. bLR Hippocampal Gene Expression Meta-Analysis

whiskers = range). **C)** bLR rats are more reactive to stressors. This example is from the behavioral data accompanying the MBNI\_RNASeq\_F43 transcriptomic dataset showing bLR rats spending a smaller percentage of time interacting socially following exposure to a single mild stressor ( $p < 0.05$ ).

Running Head: bHR vs. bLR Hippocampal Gene Expression Meta-Analysis

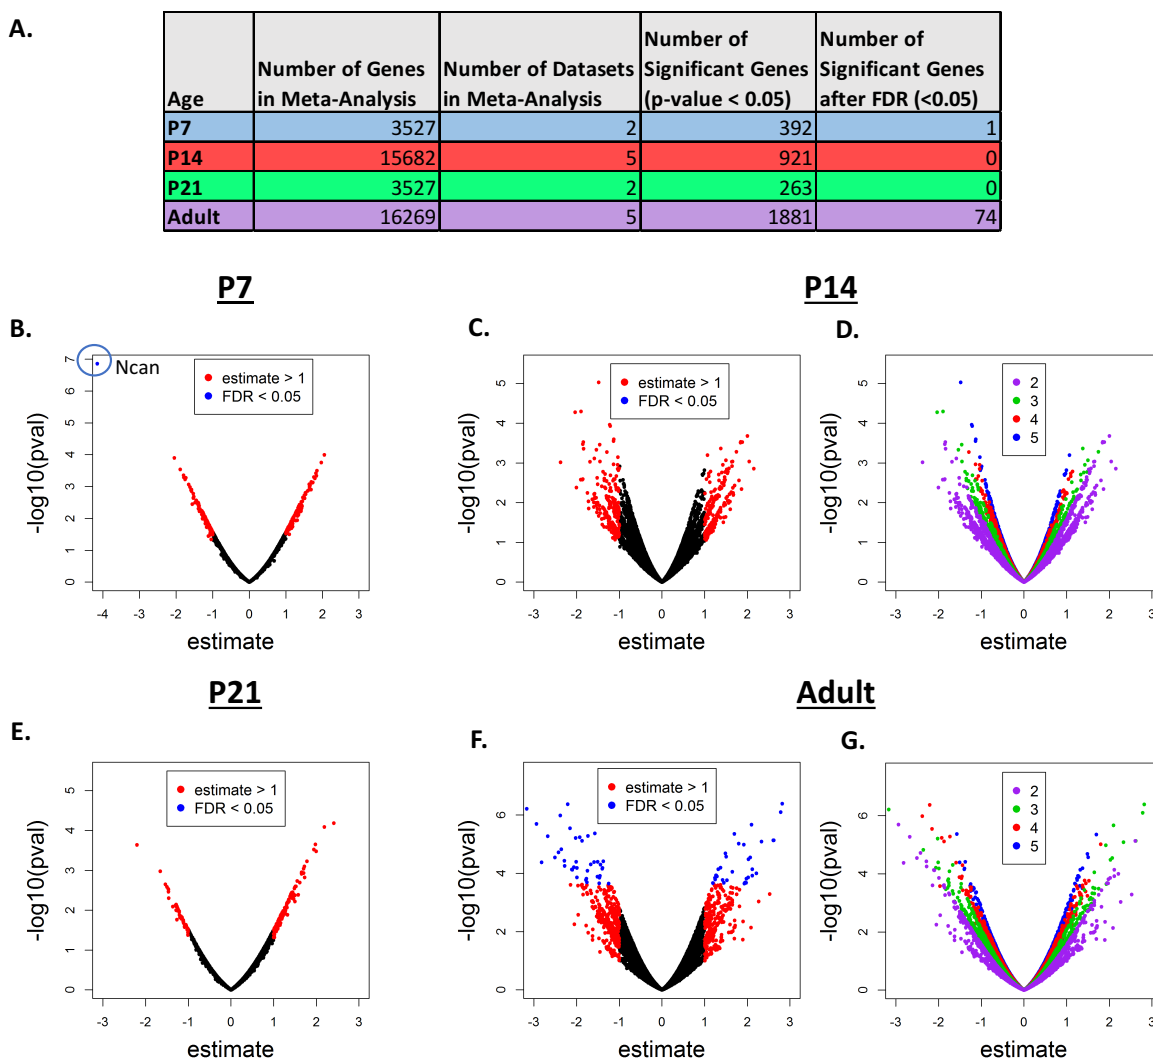

**Figure 2. Meta-analysis uncovers hippocampal gene expression related to bHR/bLR phenotype: An overview.** **A)** A table overviewing the results of the meta-analyses conducted for each of the four age groups. Genes were only included in the meta-analysis if they were represented in at least two datasets. The most differentially-expressed genes were detected within the adult meta-analysis, which predominantly included data from later generations (F29-F43). **B-G.** Volcano plots illustrating the distribution of the results for all genes included in the meta-analysis for each age group. The x-axis is the estimated effect size for each gene (i.e., the difference in expression between bHR and bLR rats in units of standard deviation, positive=higher expression in bHRs), the y-axis is the  $-\log_{10}$  nominal p-value from the meta-analysis (larger=more significant). These plots are colored to either illustrate: **B-C & E-F)** the number of genes in each meta-analysis with an estimated effect size greater than one (red) or with p-values surpassing false detection correction ( $FDR < 0.05$ , blue), **D&G)** The number of datasets included in the meta-analysis for each gene (for the P14 and adult meta-analyses). We found that the estimated effect sizes tended to be more extreme for genes that were present in fewer datasets, and less extreme for genes present in all five datasets, most likely because many genes were only represented in the RNA-Seq datasets from later generations.

Running Head: bHR vs. bLR Hippocampal Gene Expression Meta-Analysis

**A. Top Results Are Enriched with Genes Related to Cell Proliferation, Differentiation, and Development**

| Pathway                                                               | Adult NES | P14 NES | Leading Edge Genes in Adults [bold = FDR<0.10 in meta-analysis]      |
|-----------------------------------------------------------------------|-----------|---------|----------------------------------------------------------------------|
| protein_folding(6)                                                    | 2.32      | 1.14    | FKBP4, HSPA8, CCT4, CHORDC1, PDIAG, HSP90AA1, CLU, DNAJC10, TCP1     |
| positive_regulation_of_cell_proliferation(4)                          | 1.59      | -1.30   | SOX9, MFE68, APLN, GPR183, CAV1, CD24, HES5, HTRA1, GLUL, LEP        |
| nephron_development(4)                                                | 2.08      | -0.94   | SOX9, CD24, FOXD1, PTPRO, ANGP2, SERPINB7, WNK4, SOX8, LHX1, TACSTD2 |
| chaperone_mediated_protein_folding(7)                                 | 2.17      | 1.32    | FKBP4, HSPA8, CCT4, CHORDC1, CLU, PDI44, CANX, PPID, STT3, HSPD1     |
| <b>Top Pathways at P14 [FDR&lt;0.05]:</b>                             |           |         |                                                                      |
| generation_of_neurons(7)                                              | 0.94      | -1.56   | FARP1, BMP4, BEX1, SOX9, ANKRD27, SHC1, SNX3, TNC, FBXO31, TCF12     |
| negative_regulation_of_multicellular_organismal_process(3)            | 1.11      | -1.62   | BMP4, BEX1, SOX9, LRP1, XYL1, SRGAP2, SERPINF1, PF, GIMAP5, HDAC7    |
| neurogenesis(6)                                                       | 0.98      | -1.51   | FARP1, BMP4, BEX1, SOX9, ANKRD27, SHC1, SNX3, TNC, FBXO31, TCF12     |
| regulation_of_neurogenesis(6)                                         | 0.78      | -1.60   | BMP4, BEX1, SOX9, SNX3, FBXO31, TCF12, LRP1, XYL1, SRGAP2, SERPINF1  |
| neuron_differentiation(6)                                             | 0.86      | -1.56   | FARP1, BMP4, BEX1, SOX9, ANKRD27, SHC1, SNX3, TNC, FBXO31, TCF12     |
| negative_regulation_of_cellular_macromolecule_biosynthetic_process(6) | 0.92      | -1.58   | BMP4, SOX9, LXT1, CHD8, YBX1, GFPT1, RARA, ZEB1, HDAC7, KHDRBS1      |
| regulation_of_neuron_differentiation(7)                               | -0.70     | -1.59   | BMP4, BEX1, SOX9, SNX3, FBXO31, TCF12, LRP1, XYL1, SERPINF1, RARA    |
| regulation_of_nervous_system_development(5)                           | 0.83      | -1.57   | BMP4, BEX1, SOX9, SNX3, FBXO31, TCF12, LRP1, XYL1, SRGAP2, SERPINF1  |

**B. An Unbiased PPI-Network Constructed from the Top Results Highlights Genes Involved in Cell Proliferation and Differentiation**

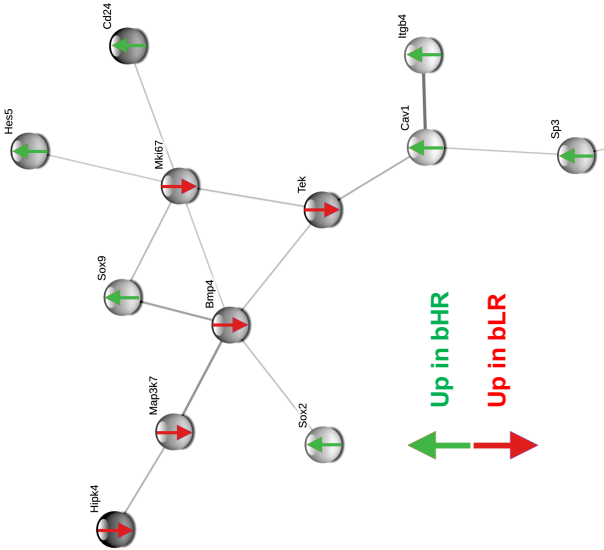

**E. The Top Result at P14 is a Master Regulator of Development, Bmp4**

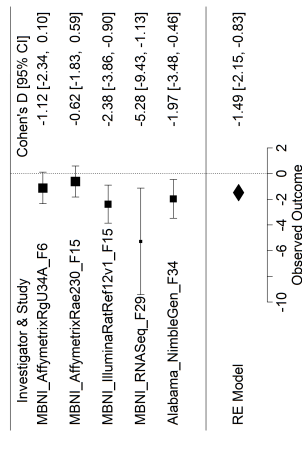

**F. Bmp4 Remains More Highly Expressed in bLRs in Adulthood**

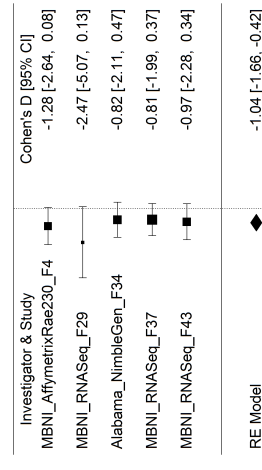

**D. Marker of Proliferation Ki-67 Correlates with Exploratory Activity**

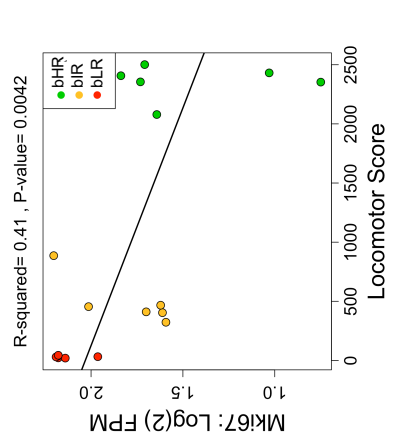

**G. Bmp4 Correlates with Anxiety**

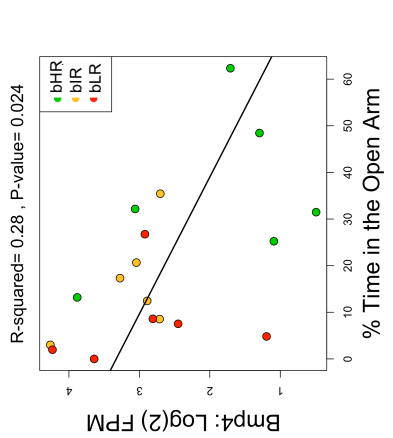

**Figure 3. The top bHR vs. bLR differential expression results are enriched with genes related to cell proliferation, differentiation, and development, including Bone morphogenetic protein 4 (Bmp4) and the canonical Marker of Proliferation (Mki67).** **A)** A table of the top functional ontology gene sets identified as enriched for bHR/bLR differentially expressed genes by GSEA (FDR: False Detection Rate; NES: Normalized Enrichment Score, with positive scores (green) indicated higher expression in bHRs and negative scores (red) indicating higher expression in bLRs, bold:  $p < 0.05$  in GSEA results, bold+italics:  $FDR < 0.05$  in GSEA results). The top 10 “Leading Edge” genes for each gene set are shown (bold+italics:  $FDR < 0.05$  in meta-analysis). These genes have large estimated effect sizes within the meta-analysis and help drive the enrichment of effects within these gene sets. **B)** A PPI network constructed using the top genes from the adult meta-analysis (192 genes with  $FDR < 0.10$ ) included a dominant subnetwork that had Bmp4 and Mki67 as hub genes. Many of these genes are related to cell proliferation and differentiation within the brain. **C)** A forest plot showing that Mki67 was consistently elevated in bLR rats in adulthood (boxes=Cohen’s D from each study +/- 95% confidence interval, adult:  $\beta = -2.01$ ,  $p = 4.03E-05$ ,  $FDR = 1.99E-02$ ). **D)** Within the behavioral data accompanying the MBNI\_RNASeq\_F37 dataset, we found that Mki67 (units=log(2) fragments per million (FPM)) showed a negative relationship with locomotor score ( $\beta = -0.000249$ ,  $R^2 = 0.41$ ,  $p = 0.0042$ ). **E-F)** Two forest plots showing that Bmp4 was consistently elevated in bLR rats in both development (P14) and adulthood (P14:  $\beta = -1.49$ ,  $p = 9.40E-06$ ,  $FDR = 1.47E-01$ ; adult:  $\beta = -1.04$ ,  $p = 1.01E-03$ ,  $FDR = 9.38E-02$ ). This direction of effect mirrors findings in the literature that show that blocking the expression of Bmp4 in mice reduces anxiety and depressive-like behavior (100). **G)** Within the behavioral data accompanying the MBNI\_RNASeq\_F37 dataset, we found that Bmp4 showed a negative relationship with percent time in the open arms ( $\beta = -0.034$ ,  $R^2 = 0.28$ ,  $p = 0.024$ ) and a positive relationship with the number of fecal boli produced on the EPM ( $\beta = 0.32$ ,  $R^2 = 0.29$ ,  $p = 0.020$ , *data not shown*).

Running Head: bHR vs. bLR Hippocampal Gene Expression Meta-Analysis

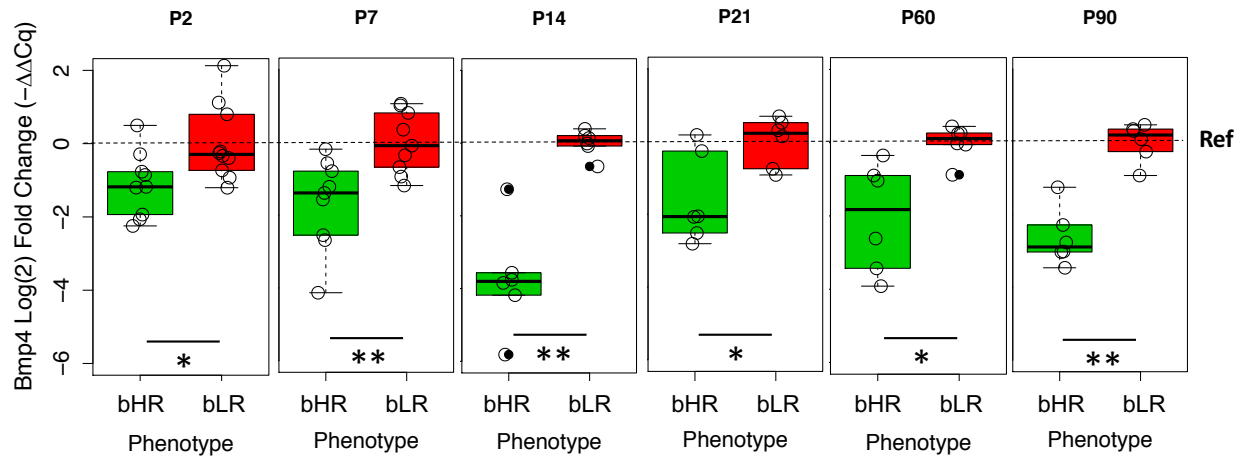

**Figure 4. Validation using qPCR in additional cohorts: *Bmp4* is more highly expressed in bLRs across development and adulthood.** We confirmed that bLRs showed greater *Bmp4* expression than bHRs at P14 and adulthood (P60, P90) as well as at other developmental time points (P2, P7, P21) using hippocampal tissue from later generations (P2=F44/F57, P7-P90=F54-F55). Log(2) fold change in *Bmp4* expression was calculated using the Livak method ( $-\Delta\Delta Cq$ , (49)), using *Gapdh* as the reference housekeeping gene and bLRs as the reference group (therefore the bLR mean is set to 0 in all panels). \* $p < 0.05$ , \*\* $p < 0.005$  (Welch's t-test: P2: Log(2)FC=-1.11, T(17.0)=-2.52,  $p = 0.0219$ ; P7: Log(2)FC=-1.68, T(14.2)=-3.34,  $p = 0.00483$ ; P14: Log(2)FC=-3.74, T(5.60)=-6.10,  $p = 0.00115$ ; P21: Log(2)FC=-1.59, T(7.72)=-2.76,  $p = 0.0257$ ; P60: Log(2)FC=-2.04, T(5.99)=-3.22,  $p = 0.0182$ ; P90: T(8.74)=-6.87,  $p = 8.44E-05$ ). Please note that the group difference at P21 may be underestimated due to differential expression of the reference housekeeping gene, which showed higher raw expression (lower Cq) in bLRs (T(9.26)=-3.01,  $p = 0.0143$ ).



Running Head: bHR vs. bLR Hippocampal Gene Expression Meta-Analysis

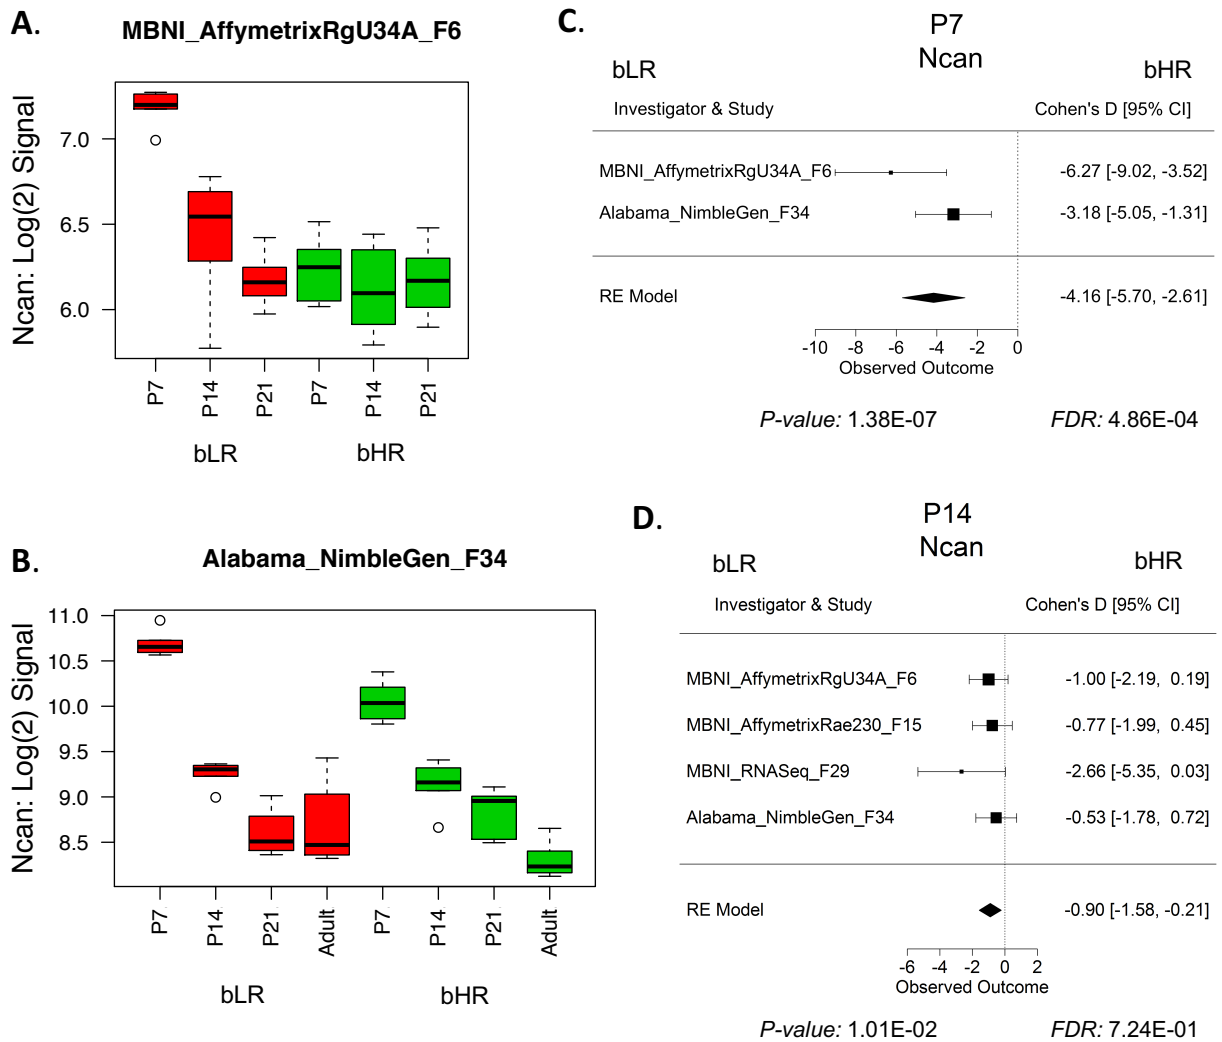

**Figure 5. Neurocan (Ncan) has elevated expression in bLR rats at age P7. A-B)** Boxplots illustrating the effect of age and bHR/bLR phenotype on Ncan expression (log<sub>2</sub> signal) in two microarray studies (boxes=median and interquartile range, whiskers=range, red=bLR, green=bHR). The effect of phenotype is most obvious at an age when Ncan is elevated in development (P7). **C-D)** Forest plots showing that Ncan was more expressed in bLRs (boxes=Cohen's D from each study +/-95% confidence interval) **C)** in the P7 meta-analysis (FDR<0.05), **D)** and nominally in the P14 meta-analysis (p<0.05).

Running Head: bHR vs. bLR Hippocampal Gene Expression Meta-Analysis

**A. Overlap with Our Previous Genetic Findings:**

| QTLs from bHR/bLR F2 Intercross: Exploratory Locomotion |                                  |             |                                   | Overlapping QTLs from Rat Genome Database |                 |                    |
|---------------------------------------------------------|----------------------------------|-------------|-----------------------------------|-------------------------------------------|-----------------|--------------------|
| Chr                                                     | QTL range in MB* (LOD>3, +/-1MB) | LOD         | Genes w/ FDR<0.1 in Meta-Analysis | Anxiety                                   | Stress Response | Behavioral Despair |
| 1                                                       | 28-31                            | 3.13        |                                   |                                           | [59]            | [62]               |
| 1                                                       | 39-65                            | <b>4.75</b> | <i>Ezr</i>                        | [53]                                      | [59]            |                    |
| 1                                                       | 98-104                           | 3.42        | Dbp                               | [53],[54]                                 | [59]            |                    |
| 1                                                       | 115-132                          | <b>7.76</b> | <i>Hmgn5b</i>                     | [53],[54]                                 | [59],[60]       |                    |
| 1                                                       | 139-142                          | 3.14        | <i>Mfge8</i>                      | [53],[54]                                 | [60]            |                    |
| 1                                                       | 156-171                          | <b>4.32</b> | <i>Olr35, Spcs2, C2cd3, Ucp2</i>  | [53],[54]                                 | [60]            |                    |
| 2                                                       | 43-70                            | <b>4.26</b> | <i>Pdzd2, Selenop</i>             | [55]                                      | [61]            |                    |
| 2                                                       | 92-95                            | 3.02        |                                   |                                           | [61], [61]      |                    |
| 3                                                       | 43-65                            | <b>4.71</b> | <i>Ttc30a1</i>                    | [55]                                      | [59]            | [62]               |
| 5                                                       | 98-102                           | 3.34        |                                   | [57],[58]                                 |                 |                    |
| 7                                                       | 67-85                            | <b>5.14</b> | <i>Trhr, Pkhd11</i>               | [55]                                      | [59]            |                    |
| 17                                                      | 157-177                          | 3.82        | <i>Chrm3, Akrl1c</i>              |                                           |                 |                    |
| 18                                                      | 71-81                            | <b>4.99</b> |                                   | [56]                                      |                 |                    |

**B. The Top Meta-Analysis Genes Often Overlap QTLs for Exploratory Locomotion**

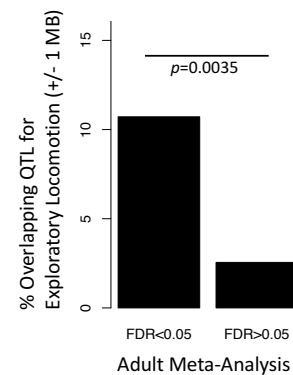

**C. Top Genomic Regions Enriched with Differentially Expressed Genes:**

| Genetic Loci Enriched with bHR/bLR Differentially Expressed Genes (PGE) |                     |          |          |                     |                  |                                                                 | Overlapping QTLs:      |            |                 |                    |
|-------------------------------------------------------------------------|---------------------|----------|----------|---------------------|------------------|-----------------------------------------------------------------|------------------------|------------|-----------------|--------------------|
| Chr                                                                     | Location (Rnor_6.0) | P-value  | FDR      | Size of Region (kb) | Enrichment Score | Genes w/ FDR<0.1 in Meta-Analysis                               | Exploratory Locomotion | Anxiety    | Stress Response | Behavioral Despair |
| 1                                                                       | 2782900-4653300     | 7.76E-04 | 1.02E-02 | 1,870               | 0.6              | <i>Samd5</i>                                                    |                        |            |                 | [62]               |
| 1                                                                       | 164225800-165684000 | 4.97E-05 | 4.68E-03 | 1,458               | 0.2              | <i>Olr35, Spcs2, C2cd3, Ucp2</i>                                | [28]                   | [53], [54] | [60]            |                    |
| 1                                                                       | 174385400-174620200 | 1.77E-04 | 5.69E-03 | 235                 | 1                | <i>Scube2</i>                                                   |                        | [54]       | [69]            |                    |
| 3                                                                       | 62800900-63455200   | 7.76E-04 | 1.02E-02 | 654                 | 0.6              | <i>Ttc30a1</i>                                                  | [28]                   | [55]       | [59]            | [62]               |
| 3                                                                       | 119361600-119677400 | 1.22E-04 | 5.69E-03 | 316                 | 0.6              | <i>Blvra</i>                                                    |                        |            | [59],[61]       | [62]               |
| 3                                                                       | 151032900-151150600 | 1.77E-04 | 5.69E-03 | 118                 | 1                | <i>Acss2, Myh7b</i>                                             |                        |            | [61]            |                    |
| 3                                                                       | 176280000-176526000 | 4.08E-04 | 7.97E-03 | 246                 | 0.8              |                                                                 |                        |            |                 |                    |
| 5                                                                       | 155246400-155264100 | 1.77E-04 | 5.69E-03 | 18                  | 1                | <i>C1qa, C1qc</i>                                               |                        | [55]       |                 |                    |
| 7                                                                       | 81919900-83358500   | 2.02E-04 | 6.05E-03 | 1,439               | 0.5              | <i>Trhr</i>                                                     | [28]                   | [55]       | [59]            |                    |
| 10                                                                      | 88392200-103730100  | 6.80E-05 | 4.68E-03 | 15,338              | 0.1              | <i>Slc9a3r1, Sox9, Tubg1, Ghdc, Tmem101, Acbd4, Ddx42, Etv4</i> |                        | [56]       | [70], [71]      |                    |
| 12                                                                      | 37444100-39302600   | 4.30E-06 | 2.96E-03 | 1,859               | 0.3              | <i>Eif2b1</i>                                                   |                        |            |                 |                    |
| 16                                                                      | 81035000-81209500   | 3.35E-05 | 4.68E-03 | 175                 | 0.8              |                                                                 |                        |            | [61]            |                    |
| 19                                                                      | 32182900-42110300   | 2.85E-05 | 4.68E-03 | 9,927               | 0.1              | <i>Lcat, Ist1, Zfp821, Zfp612, Zfp90</i>                        |                        |            |                 |                    |

**Figure 6. Many of the top genes identified by our bHR/bLR meta-analyses are located within quantitative trait loci (QTLs) for exploratory locomotion identified by our concurrent genetic study. A.** Several of the top genes identified by our meta-analysis overlap quantitative trait loci (QTL) identified by our concurrent genetic study (28). Our concurrent genetic study used exome sequencing to identify variants that segregated bHR/bLR rats in our colony, and then used a sampling of those segregating variants to identify QTLs for exploratory locomotor activity in a novel field using an bHR/bLR F2 intercross (28). Shown are the top genes from our meta-analyses (FDR<0.1, bold+italic=FDR<0.05) that overlap (+/-1 MB) significant (LOD>4) and putative (LOD>3) QTLs identified by this study. Also depicted is overlap with QTLs identified in the Rat Genome Database (48) for the following behaviors relevant to the bHR/bLR phenotype: anxiety (53–58), stress-related responses (59–61), and behavioral despair (62). **B.** The top meta-analysis genes (FDR<0.05) were 4.5x more likely to overlap (+/-1MB) QTLs for exploratory locomotion than other genes included in our meta-analysis (Fisher’s exact test:  $p=0.0035$ ). **C.** The top chromosomal loci enriched for bHR/bLR differentially expressed genes overlap with previously-identified QTLs relevant to externalizing and internalizing behaviors. The top chromosomal loci enriched for bHR/bLR differentially expressed genes were identified using positional gene enrichment analysis (PGE): location (full coordinates), p-value=nominal p-value, FDR=false detection rate, enrichment score= ratio of genes with  $p<0.01$  out of all genes in the region. Also depicted is the overlap (+/-1 MB) of these enriched chromosomal loci with QTLs for exploratory locomotor activity (28), as well as with QTLs identified in the Rat Genome Database (48) for the following behaviors relevant to the

Running Head: bHR vs. bLR Hippocampal Gene Expression Meta-Analysis

bHR/bLR phenotype: anxiety (53–56), stress-related responses (59–61, 69–71), and behavioral despair (62).

Running Head: bHR vs. bLR Hippocampal Gene Expression Meta-Analysis

**A. Hippocampal-Specific Gene Sets Enriched with bHR/bLR Differential Expression**

| Top Co-expression Networks in Adults (FDR<0.10): | Adult NES | P14 NES | Leading Edge Genes in Adults (Bold = FDR<0.10 in meta-analysis):              |
|--------------------------------------------------|-----------|---------|-------------------------------------------------------------------------------|
| From mouse: "paleturquoise"                      | 1.94      | -1.08   | <b>ADAMTS2</b> ,FOXC1,FBLN1,MRC1,OMD,ANGPT2,EMP3,BGN,CD248,HSPB1              |
| From human: "M11"                                | -1.72     | -1.84   | <b>FBXO31</b> ,NPHP4,PPME1,ARHGAP39,FAM131B,PLXNA1,NCOR2,PPFIA4,DMTN,STRN4    |
| From mouse: "darkred"                            | -1.68     | 0.98    | MTF2,DUSP11,SNHG11,DDX26B,LRRC29,RYR3,NFKBIZ,EMLS,TCF25,NRXN3                 |
| From human: "M24"                                | 1.54      | -0.97   | <b>EZR</b> ,ITSN1,IDNK,PPAP2B,FAM167A,GFPT2, <b>ITGB4</b> ,PSD2,PITPNC1,PHGDH |
| From mouse: "sienna3"                            | 1.91      | -0.64   | OTOF, <b>TRHR</b> ,SMOC1,ZBTB7C,GLRA2,GRB10,MEIS1,GPR83,ARHGAP6               |
| From mouse: "lightcyan"                          | -1.27     | -1.47   | <b>RLTPR</b> ,ATMIN,KAT2A,IPH3,ACAD8,REV1,USE1,B9D2,RAB3D,PWWP2B              |

| Top Co-expression Networks at P14 (FDR<0.10): | Adult NES | P14 NES | Leading Edge Genes at P14 (Bold = FDR<0.10 in meta-analysis):         |
|-----------------------------------------------|-----------|---------|-----------------------------------------------------------------------|
| From mouse: "lightyellow"                     | -1.13     | -1.56   | ZFP277,ACTA2,DMWD,SEMA7A,UQCRC1,CNNM3,ATM,NPAS2,NCAN,BRD4             |
| From human: "M11"                             | -1.72     | -1.84   | DTX3,FBXO31,GFOD1,HYOU1,ADCY9,LRFN4,DYRK1B,PTMS,UBA1,WBSCR17          |
| From mouse: "lightcyan"                       | -1.27     | -1.47   | H1FX,ELFN2,ZCRB1,APBA2,SLC2A13,POLK,SNUPN,ATG5,HYOU1,SNAPIN           |
| From human: "M1"                              | NA        | -1.36   | EID2,CHST15,RIMBP2,EMX1,NT5C3B,ELFN2,FAM65A,SRSF7,ZDHHC22,APBA2       |
| From mouse: "skyblue"                         | 0.86      | -1.84   | TSC22D4,MOBP,ADSSL1,SLC35B2,OPALIN,MAG,EHFD1,GJC2,ITGB4               |
| From human: "M7"                              | -1.45     | -1.70   | ARHGEF4,ST6GALNAC6,DHRS11,AGAP3,B3GAT1,ARHGEF25,LRP3,PLSCR3,LMO4,NCS1 |

| Top Regional Markers in Adults (FDR<0.10): | Adult NES | P14 NES | Leading Edge Genes in Adults (Bold = FDR<0.10 in meta-analysis): |
|--------------------------------------------|-----------|---------|------------------------------------------------------------------|
| "dg_v VS dg_d"                             | 2.05      | 0.88    | <b>TRHR</b> ,TOX3,PDZRN3,FBLN1,TSHZ1,STK32B,ZFP423,NCAPG,LCORL   |

| Top Regional Markers at P14 (FDR<0.10):        | Adult NES | P14 NES | Leading Edge Genes at P14 (Bold = FDR<0.10 in meta-analysis):  |
|------------------------------------------------|-----------|---------|----------------------------------------------------------------|
| "dg_d-dg_v VS_ca4-ca3_d-ca3_v-ca2-ca1_d-ca1_v" | -0.88     | -1.76   | SCN3A,ARHGAP20,MARCKS,SV2C,PDE7B,TRPC6,SLC4A4,BTG2,IGFBP5,RFX3 |

**B. Trhr is the Top Result in a Section of Chr 7 Enriched for Differentially-Expressed Genes**

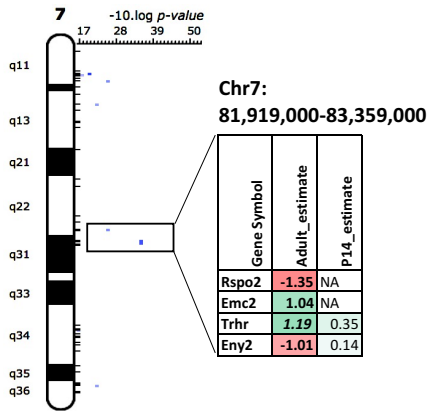

**C. Trhr is the Top Result Within a Hippocampal Co-expression Network Enriched for Differentially-Expressed Genes**

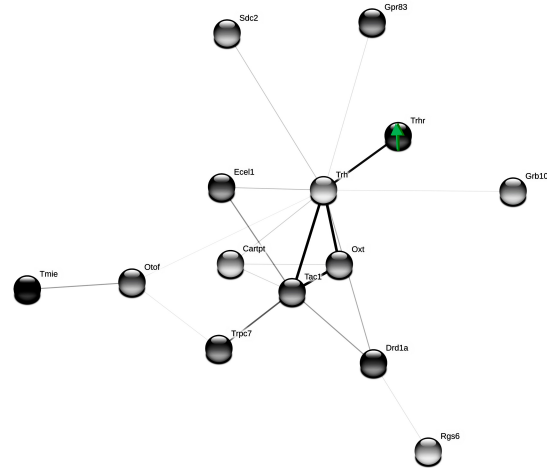

**D. Trhr is More Highly Expressed in bHR Rats in Adulthood**

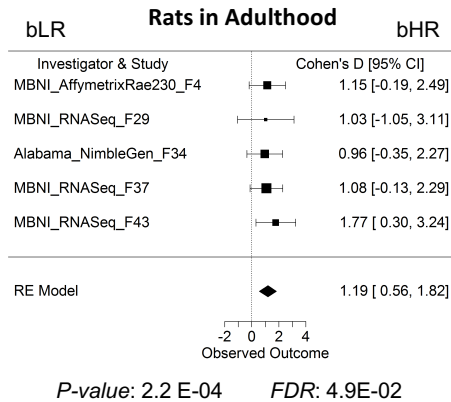

**D. Trhr Correlates with Exploratory Activity**

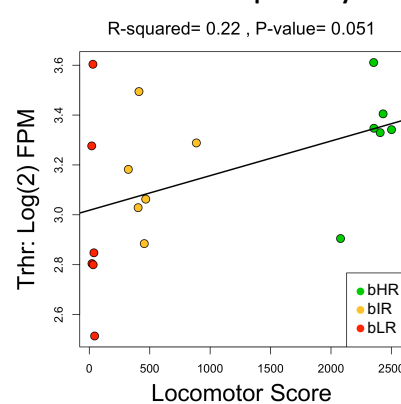

**Figure 7. Thyrotropin releasing hormone receptor (Trhr) was the top gene within two hippocampal specific gene sets and within a region of Chromosome 7 enriched for bHR/bLR differential expression. A)** The top hippocampal-specific gene sets identified as enriched for bHR/bLR differentially expressed genes by GSEA (FDR: False Detection Rate; NES: Normalized Enrichment Score, with positive scores (green) indicating greater expression in bHRs and negative scores (red) indicating greater expression in bLRs, bold:  $p < 0.05$  in GSEA results, bold+italics:  $FDR < 0.05$  in GSEA results). The top 10 “Leading Edge” genes for each gene set are shown (bold+italics:  $FDR < 0.05$  in meta-analysis). These genes have large estimated effect sizes within the meta-analysis and help drive the enrichment of effects within these gene sets. Note that *Trhr* is the strongest leading gene in two of the gene sets. **B)** *Trhr* was the strongest result within a segment of Chromosome 7 enriched for differentially expressed genes and containing a QTL for exploratory locomotor activity (28). The table illustrates the differentially expressed genes within this region: estimate=estimated effect size (green/positive=greater expression in bHRs), bold= $p < 0.05$ , bold+italic= $FDR < 0.05$ . **C)** The ligand for *Trhr*, *Trh*, is a hub gene within a hippocampal specific co-expression network that includes *Trhr* and is enriched for bHR-upregulated genes. Genes within this network with known protein-protein interactions are illustrated above. Many of these genes have documented associations with reward behavior. **D)** A forest plot showing that *Trhr* expression was consistently elevated in bHR rats since generation F4 (5 datasets, boxes=Cohen’s D from each study  $\pm$  95% confidence interval,  $\beta = 1.19$ ,  $p = 2.16E-04$ ,  $FDR = 4.94E-02$ ). This direction of effect mirrors findings in the literature that show *Trhr*-KO mice exhibit greater anxiety and depressive-like behavior (68). **E)** In the behavioral data accompanying the MBNI\_RNASeq\_F37 dataset, *Trhr* (units: log(2) fragments per million (FPM)) showed a trend towards a positive relationship with exploratory locomotor activity ( $\beta = 4.48E-04$ ,  $R^2 = 0.22$ ,  $p = 5.08E-02$ ).

### A. C2cd3 and Ucp2 are the Top Results in a Region of Chr 1 Enriched for Differentially-Expressed Genes

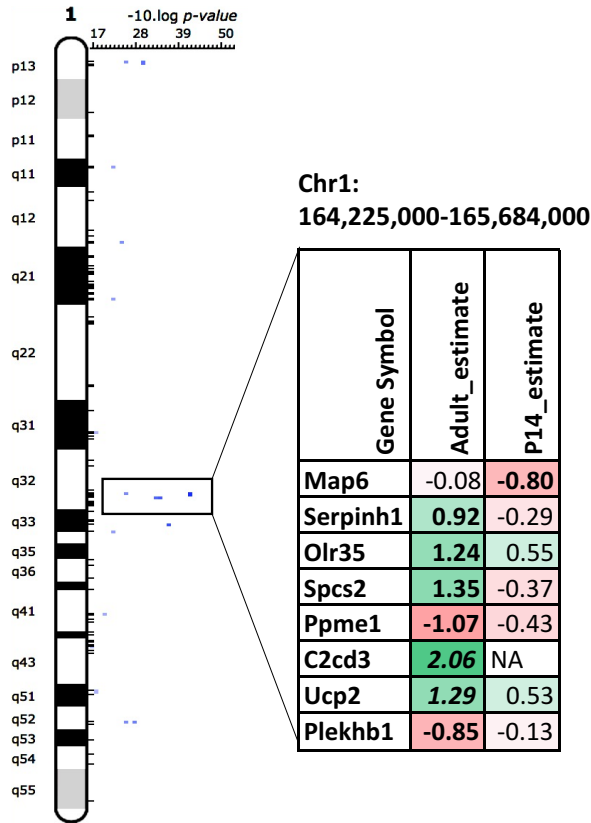

### B. C2cd3 is More Highly Expressed in bHRs in Adulthood

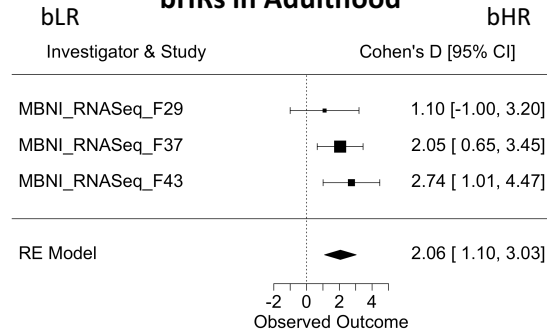

### C. C2cd3 Correlates with Exploratory Activity

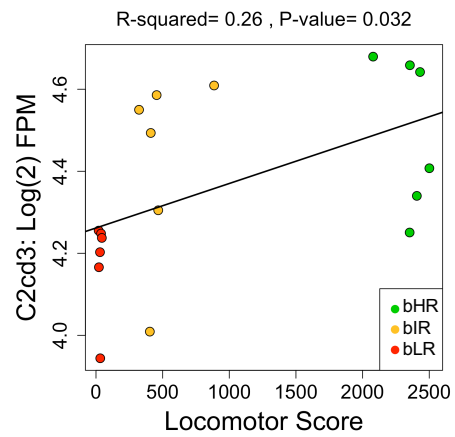

### D. Ucp2 is More Highly Expressed in bHR Rats in Adulthood

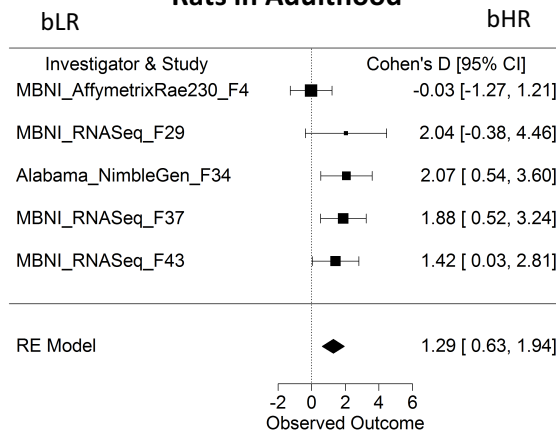

### E. Ucp2 Correlates with Anxiety

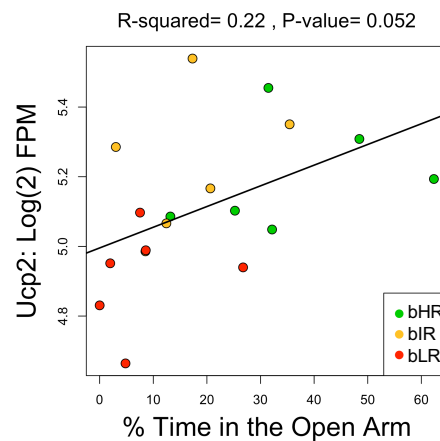

**Figure 8. A region on chromosome 1 that contains a QTL for exploratory locomotor activity is enriched for bHR/bLR differential expression and contains two genes important for brain function and development, C2 Calcium Dependent Domain Containing 3 (C2cd3) and Uncoupling Protein 2 (Ucp2).** **A)** C2cd3 and Ucp2 were the top results within a segment of Chromosome 1 enriched for differentially expressed genes and containing a QTL for exploratory locomotor activity (28). The table illustrates the differentially expressed genes within this region: estimate=estimated effect size (green/positive=higher expression in bHRs), bold= $p < 0.05$ , bold+italic=FDR<0.05. **B)** A forest plot showing that C2cd3 had higher expression in bHRs in three adult datasets included in the adult meta-analysis (boxes=Cohen's D from each study +/-95% confidence interval, effect of phenotype:  $\beta = 2.06$ ,  $p = 2.84E-05$ , FDR=1.73E-02). **C)** In the behavioral data accompanying the MBNI\_RNASeq\_F37 dataset, C2cd3 (units: log(2) fragments per million (FPM)) showed a positive relationship with exploratory locomotor activity ( $\beta = 0.000109$ ,  $R^2 = 0.26$ ,  $p = 3.20E-02$ ). **D)** A forest plot showing that Ucp2 had higher expression in bHRs in four out of the five adult datasets included in the adult meta-analysis (effect of phenotype:  $\beta = 1.29$ ,  $p = 1.27E-04$ , FDR=3.83E-02). This direction of effect mirrors findings in the literature showing that Ucp2 knockout mice have higher anxiety-like behavior and lower locomotor activity, as well as greater sensitivity to stress (63, 64, 66, 67), much like our bLR rats. **E)** In the behavioral data accompanying the MBNI\_RNASeq\_F37 dataset, Ucp2 showed a trend towards a positive relationship with percent of time spent in the anxiogenic open arms of the EPM ( $\beta = 0.03$ ,  $R^2 = 0.22$ ,  $p = 5.16E-02$ ).

Running Head: bHR vs. bLR Hippocampal Gene Expression Meta-Analysis

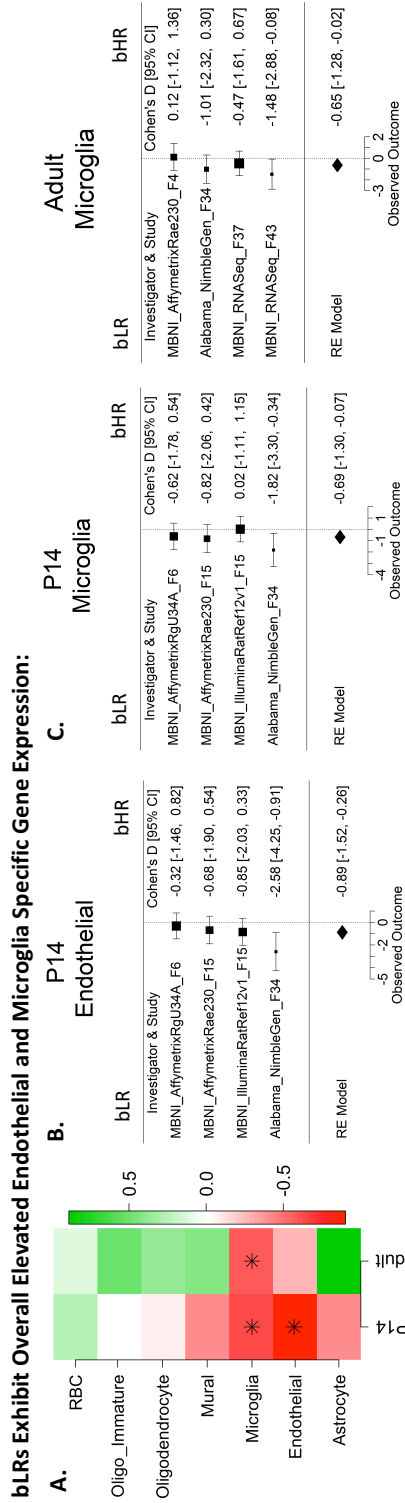

**Microglia Activation State May Differ In bHRs and bLRs:**

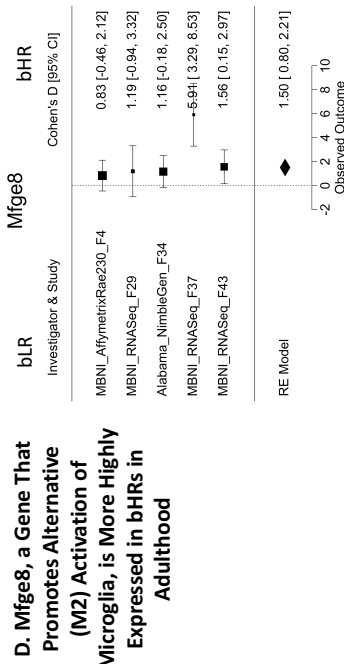

**F. C1qa, a Gene That Promotes Classical Activation of Microglia, is More Highly Expressed in bLRs in Adulthood**

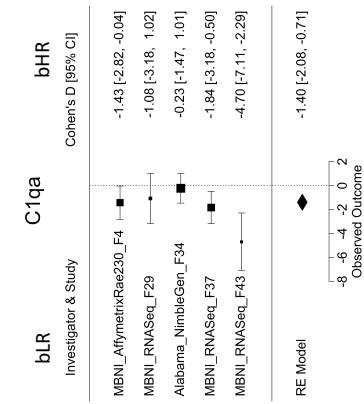

**E. Mfge8 Correlates with Exploratory Activity and Anxiety**

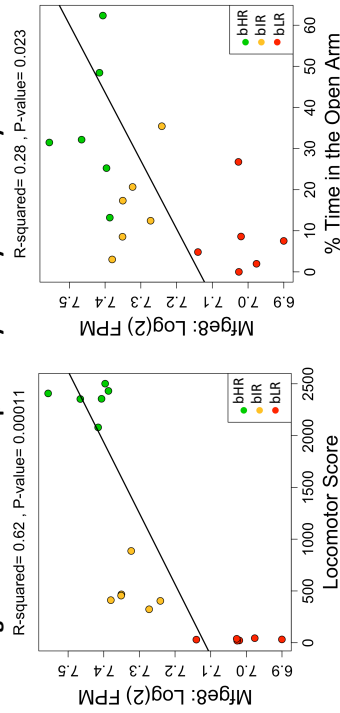

**G. C1qa Correlates with Exploratory Activity**

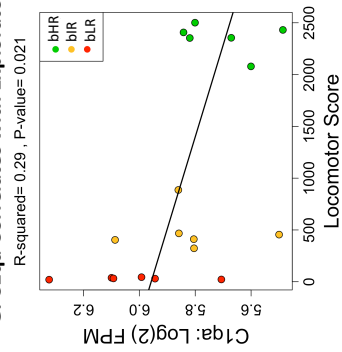



**Figure 9. There is an overall upregulation of endothelial- and microglial-specific gene expression in bLR rats. A)** A heatmap illustrating the effect of bHR/bLR phenotype on cell type specific gene expression, which often reflects overall cell type balance (33): green=upregulated in bHRs, red=upregulated in bLRs,  $*=p<0.05$ . **B-C)** Forest plots showing an upregulation of endothelial-specific (**B**) and microglial-specific (**C**) gene expression in bLRs in development (P14) and adulthood ( $p<0.05$ , boxes=Cohen's D from each study  $\pm$ 95% confidence interval). **D, F)** Forest plots illustrating that two regulators of microglial activation state are differentially expressed in bHRs and bLRs (boxes=Cohen's D from each study  $\pm$ 95% confidence interval). **D)** In all five adult datasets, Milk fat globule-EGF factor 8 (Mfge8), a gene that promotes alternative (M2) activation of microglia, has elevated expression in bHRs in adulthood ( $\beta=1.50$ ,  $p=2.70E-05$ ,  $FDR=1.73E-02$ ). **E)** Within the behavioral data accompanying the MBNI\_RNASeq\_F37 dataset, Mfge8 (units=log(2) fragments per million (FPM)) showed a positive relationship with total locomotor score ( $\beta=0.000146$ ,  $R^2=0.62$ ,  $p=1.10E-04$ ) as well as the percent time in the open arms of the EPM ( $\beta=0.00603$ ,  $R^2=0.28$ ,  $p=2.30E-02$ ). **F)** Complement component C1q A Chain (C1qa), a gene that promotes classical activation of microglia, had elevated expression in bLRs in five adult transcriptomic studies (C1qa:  $\beta=-1.40$ ,  $p=6.57E-05$ ,  $FDR=2.61E-02$ ). The other two complement component C1q genes showed a similar trend (C1qb:  $\beta=-1.07$ ,  $p=3.02E-03$ ,  $FDR=1.50E-01$ , C1qc:  $\beta=-1.20$ ,  $p=3.57E-04$ ,  $FDR=5.43E-02$ , *data not shown*). **G)** Within the behavioral data accompanying the MBNI\_RNASeq\_F37 dataset, C1qa showed a negative relationship with total locomotor score (C1qa:  $\beta=-5.17E-04$ ,  $R^2=0.29$ ,  $p=2.09E-02$ ).
