**Genetic liability for internalizing versus externalizing behavior manifests in the developing and adult hippocampus: Insight from a meta-analysis of transcriptional profiling studies in a selectively-bred rat model**

Isabelle A. Birt<sup>1\*</sup>, Megan H. Hagenauer, Ph.D.<sup>1\*</sup>, Sarah M. Clinton, Ph.D.<sup>2</sup>, Cigdem Aydin, Ph.D.<sup>1</sup>, Peter Blandino, Jr., Ph.D.<sup>1</sup>, John D. H. Stead, Ph.D.<sup>3</sup>, Kathryn L. Hilde, Ph.D.<sup>1</sup>, Fan Meng, Ph.D.<sup>1</sup>, Robert C. Thompson, Ph.D.<sup>1</sup>, Huzefa Khalil, Ph.D.<sup>1</sup>, Alex Stefanov<sup>1</sup>, Pamela Maras, Ph.D.<sup>1</sup>, Zhifeng Zhou, Ph.D.<sup>4</sup>, Elaine K. Hebda-Bauer, Ph.D.<sup>1</sup>, David Goldman, Ph.D.<sup>4</sup>, Stanley J. Watson, Jr., Ph.D.<sup>1</sup> and Huda Akil, Ph.D.<sup>1</sup>

<sup>1</sup>University of Michigan, Ann Arbor, MI, USA; <sup>2</sup>Virginia Tech University, Blacksburg, VA, USA;

<sup>3</sup>Carleton University, Ottawa, Ontario, CA; <sup>4</sup> National Institute on Alcohol Abuse and Alcoholism, National Institutes of Health, Bethesda, MD, USA

\*Shared first authorship

Correspondence:

Megan Hastings Hagenauer, Ph.D.

e-mail: [hagenaue@umich.edu](mailto:hagenaue@umich.edu)

Molecular Behavioral Neuroscience Institute (MBNI)

205 Zina Pitcher Pl.

Ann Arbor, MI 48109

1 **Abstract**

2  
3 **Background:** For over 16 years, we have selectively bred rats to show either high or  
4 low levels of exploratory activity within a novel environment. These “bred High Responder”  
5 (bHR) and “bred Low Responder” (bLR) rats serve as a model for temperamental extremes,  
6 exhibiting large differences in many internalizing and externalizing behaviors relevant to mood  
7 and substance abuse disorders.

8 **Methods:** Our study elucidated persistent differences in gene expression related to  
9 bHR/bLR phenotype across development and adulthood in the hippocampus, a region critical  
10 for emotional regulation. We meta-analyzed eight transcriptional profiling datasets (microarray,  
11 RNA-Seq) spanning 43 generations of selective breeding (adult:  $n=46$ , P7:  $n=22$ , P14:  $n=49$ ,  
12 P21:  $n=21$ ; all male). We cross-referenced these results with exome sequencing performed on  
13 our colony to pinpoint candidates likely to mediate the effect of selective breeding on behavioral  
14 phenotype.

15 **Results:** Genetic and transcriptional profiling results converged to implicate two genes  
16 with previous associations with metabolism and mood: Thyrotropin releasing hormone receptor  
17 and Uncoupling protein 2. Our results also highlighted bHR/bLR functional differences in the  
18 hippocampus, including a network essential for neurodevelopmental programming, proliferation,  
19 and differentiation, containing hub genes Bone morphogenetic protein 4 and Marker of  
20 proliferation ki-67. Finally, we observed differential expression related to microglial activation,  
21 which is important for synaptic pruning, including two genes within implicated chromosomal  
22 regions: Complement C1q A chain and Milk fat globule-EGF factor 8.

23 **Conclusion:** These candidate genes and functional pathways have the capability to  
24 direct bHR/bLR rats along divergent developmental trajectories and promote a widely different  
25 reactivity to the environment.  
26

27

28 **Keywords:** Anxiety, Depression, Hyperactivity, Impulsivity, Limbic, Neonatal, Postnatal, Trhr,

29 Ucp2, Ncan, Bmp4, Mki67, C1qa, Mfge8, Etv4

30

31

32 **Introduction**

33  
34 The strong pattern of comorbidity amongst psychiatric disorders is believed to be  
35 generated by a spectrum of latent liability (1), arising from a complex interplay of genetic risk  
36 and environmental factors, such as stress and childhood adversity (1–3). At one end of this  
37 spectrum are internalizing disorders, which are associated with neuroticism, anxiety, and  
38 depression. At the other end of the spectrum are externalizing disorders, which are associated  
39 with risk-taking and novelty-seeking, as seen in mania, substance abuse, and impulse-control  
40 disorders (1).

41 We model the genetic contributions underlying both extremes of this spectrum by  
42 selectively breeding rats that react differently to a novel environment. “Bred High Responder”  
43 (bHR) rats are highly exploratory with a disinhibited, novelty-seeking temperament, including  
44 hyperactivity, aggression, and drug-seeking. “Bred Low Responder” (bLR) rats are highly-  
45 inhibited, exhibiting reduced locomotor activity and anxious and depressive-like behavior (4–13).  
46 These behavioral propensities are robust and stable, beginning early in development (14,15)  
47 similar to temperament in humans (16).

48 This highly-differentiated phenotype makes bHR/bLR rats ideal for observing the  
49 developmental programming and adult manifestation of neurological factors underlying  
50 internalizing and externalizing tendencies (8,11,17). This study focused on the hippocampus, a  
51 region important for emotional regulation, behavioral inhibition (18–20), and reactivity to the  
52 environment (18), including stress-related glucocorticoid release (21,22). In the bHR/bLR model,  
53 we previously observed differences in hippocampal glucocorticoid receptor and growth factor  
54 expression, histone methylation, cell proliferation, survival, and overall volume (5,9,14,23,24).

55 Our current study characterized hippocampal gene expression in bHR/bLR rats across  
56 development and adulthood using a meta-analysis of eight transcriptional profiling datasets  
57 spanning 43 generations of selective breeding. Concurrently, we discovered chromosomal

58 regions containing bHR/bLR segregating variants that are likely to contribute to exploratory  
59 locomotor phenotype (25). By comparing across these studies, we identified differentially-  
60 expressed (DE) genes situated within implicated chromosomal regions and hippocampal  
61 functional pathways essential for mood and development (**Fig 1**). These genes are promising  
62 candidates for mediating the influence of selective breeding on behavioral phenotype.

63

64

[Figure 1]

65

66

67

## Methods

68

69

Full methods for the individual experiments and analyses are provided in the

70

supplement. The associated datasets have been released on GEO (**Table 1**) or FigShare

71

(<https://doi.org/10.1101/774034>). Analysis code (R Studio v.1.0.153, R v.3.2.2) is available at

72

<https://github.com/isabellie4/PhenotypeProject> and

73

[https://github.com/hagenaue/bHRbLR\\_MetaAnalysisProject](https://github.com/hagenaue/bHRbLR_MetaAnalysisProject).

74

75

[Table 1]

76

77

### The bHR/bLR Rat Colony

78

All experiments were approved by the local University Committee on the Use and Care

79

of Animals, in accordance with the National Institutes of Health Guide for the Care and Use of

80

Laboratory Animals.

81

82

**Selective Breeding:** We began selectively-breeding bHR/bLR rats in the Molecular

83

Behavioral Neuroscience Institute (MBNI) at the University of Michigan in 2003 (protocol: (11)).

84 Later, a second colony was begun at the University of Alabama-Birmingham using generation  
85 F30 bHR/bLR rats from MBNI. Our meta-analyses use datasets derived from male bHR/bLR  
86 rats spanning generations F4-F43. We refer to these datasets according to their respective  
87 institution, transcriptional profiling platform, and generation (**Table 1**). *MBNI\_RNASeq\_F37* also  
88 included a bHRxbLR cross (“Intermediate Responder” (bIR) rats)).

89

90 **Behavioral Testing:** For each generation, locomotor response to a novel environment  
91 was assessed between P50–75 (11). For *MBNI\_RNASeq\_F37*, we measured anxiety-like  
92 behavior in adulthood (bHR/bLR: P160-P167; bIR: P65-75) using the percent time spent in the  
93 open arms of an Elevated Plus Maze (EPM; 5 min test, protocol: (26)). For  
94 *MBNI\_RNASeq\_F43*, we measured social interaction in adulthood (P92, protocol: (4)) after 15  
95 min exposure to the anxiogenic open arms of the EPM (protocol: (27)).

96

## 97 Hippocampal Gene Expression Analyses

98

99 **Broad Overview of the Datasets:** Our meta-analyses included eight datasets from  
100 bHR/bLR rats aged P7, P14, P21, and adult (**Table 1**). The rats were housed in standard  
101 conditions with minimal intervention besides behavioral testing or saline injections, and  
102 sacrificed by rapid decapitation without anesthesia. The whole hippocampus was dissected,  
103 except in *Alabama\_Nimblegen\_F34*, where dorsal hippocampal tissue punches were performed  
104 on sliced frozen tissue (28). The extracted RNA was profiled using microarray (earlier  
105 generations: F4, F6, F15, F34) or RNA-Seq (later generations: F29, F37, F43).

106

107 **Broad Overview of the Data Preprocessing:** The pre-processing steps for each study  
108 varied according to platform, but included common steps, including re-annotation, normalization  
109 to reduce technical variation, and quality control. Microarray data were typically summarized into

110 log<sub>2</sub>-transformed expression sets using Robust Multi-Array Average (RMA: (29)). Gene-level  
111 RNA-Seq read count summaries were converted to log(2) fragments per million (FPM). When  
112 applicable, transcript data were averaged by gene symbol to obtain a single expression value  
113 per sample per gene.

114

115 **Meta-Analyses:** Within each dataset, we calculated the effect size (Cohen's d and  
116 variance of d) of bHR/bLR phenotype on the expression data for each gene within each age  
117 group. This output was aligned across datasets using official gene symbol. The meta-analysis  
118 for each age group was performed using *rma.mv()* (package *metafor* (30)) and corrected for  
119 false discovery rate (FDR; Benjamini-Hochberg method in *multtest*: (31)). Including generation  
120 as a co-variate provided little additional insight (*generation*: all genes FDR>0.3).

121

122 **Overlap with Previously-Identified Genetic Variants:** Our exome sequencing study  
123 identified bHR/bLR segregating variants (single-nucleotide polymorphisms, or SNPs), and used  
124 a sampling of those variants to pinpoint quantitative trait loci (QTLs) for exploratory locomotion  
125 using an bHRxbLR F2 intercross (25). In our current study, we identified all DE genes nearby  
126 (+/- 1 MB) the segregating variants and QTL peaks (LOD>3) and determined overlap with  
127 additional QTLs relevant to bHR/bLR behavioral phenotype from Rat Genome Database ((32),  
128 accessed 08/08/2019, keywords: "Anxiety", "Stress", and "Despair").

129

130 **Positional Gene Enrichment Analysis:** To explore which genes might be either co-  
131 regulated or in linkage disequilibrium with a causal genetic variant, we evaluated the clustering  
132 of top bHR/bLR DE genes within chromosomal regions using Positional Gene Enrichment  
133 analysis (*PGE*, <http://silico.biotoul.fr/pge/>, (33)) and the top results from the P14 and adult meta-  
134 analyses (nominal p<0.01, removing duplicated EntrezIDs).

135

136 **Gene Set Enrichment Analysis (GSEA) & Protein-Protein Interaction (PPI)**

137 **Networks:** To elucidate overall functional trends within the largest sets of results (P14 and  
138 Adult) we used GSEA ((34,35); package *fgsea* (36)) and gene set matrix files (.gmt) containing  
139 standard gene ontology for rats (go2msig.org; (37)), or customized hippocampal-specific gene  
140 sets (**Table S1**) including previously-identified co-expression modules (38,39) and expression  
141 specific to hippocampal neuronal subtypes or subregions (*Hipposeq*: (40)). We further explored  
142 top DE genes (adult meta-analysis FDR<0.10) and implicated hippocampal gene sets using  
143 predicted PPI networks (string-db.org (41)).

144

145 **Cell Type Data Deconvolution:** To interrogate the relative cell type composition of our  
146 samples, we used the *BrainInABlender* method (42). Data for genes previously identified as  
147 having cell type specific expression was extracted, normalized, and averaged to produce a “cell  
148 type index”. For this analysis, we excluded the small MBNI\_RNASeq\_F29 dataset (n=2/group).  
149 We then performed a meta-analysis of the effects of bHR/bLR phenotype on these cell type  
150 indices using aforementioned methods.

151 **qPCR Validation:** Hippocampal tissue from 6 bHR and 6 bLR males was collected at  
152 ages P14 (generation F55) and P90 (generation F51; **Fig S1**). Following cDNA synthesis, Bone  
153 morphogenetic protein 4 (*Bmp4*) was quantified using qPCR and custom-designed primers,  
154 using the Livak method (43) and glyceraldehyde-3-phosphate dehydrogenase (*Gapdh*) as  
155 reference. Group differences in  $-\Delta C_q$  at each age were assessed using Welch’s two-sample t-  
156 test (44).

157

158

**Results**

159



## 160 **Selective Breeding Amplifies the Propensity for Internalizing vs. Externalizing Behavior**

161 The divergence of bHR/bLR exploratory activity in response to selective breeding  
162 happened rapidly (**Fig 2A**), implying oligogenic inheritance (25). This divergence was  
163 accompanied by a general amplification of internalizing and externalizing tendencies  
164 (11,14,45,46). For example, in the behavioral data accompanying our transcriptional profiling  
165 datasets, bLRs showed more anxiety-like behavior than bHRs (**Fig 2B**), and spent less time  
166 interacting socially following a stressful challenge (**Fig 2C**). Therefore, we expected that  
167 examining gene expression across bHR/bLR generations would reveal a convergence of effects  
168 within implicated chromosomal regions and pathways essential to affective behavior and  
169 reactivity to the environment.

170

171 [FIGURE 2]

172

## 173 **Selective Breeding for Exploratory Locomotion Alters Hippocampal Gene Expression**

174 Between generations F4-43, we conducted eight exploratory studies transcriptionally  
175 profiling the hippocampus of bHR/bLR rats at four ages (P7, P14, P21, and adult). These small  
176 studies individually produced few reliable results (**Figs S2-S3**). Nevertheless, a formal meta-  
177 analysis revealed multiple genes with consistent DE across generations (**Fig 3, Table S2**).

178 These results can be explored interactively at

179 <https://mbni.org/dashboard/huzefak/hrlrMetaAnalysis/>.

180

181 [FIGURE 3]

182

183 **Adulthood:** The effect of bHR/bLR phenotype on gene expression was significant for 74  
184 genes (FDR<0.05, out of 16,269; **Fig 3**). In general, the estimated effect sizes ( $\beta$ 's) tended to be  
185 more extreme for genes exclusively represented in RNA-Seq data from later generations (**Fig**

186 **S4**), but due to smaller sample size, these effects were not overrepresented in the top results.  
187 To rule out bias due to platform, we ran a meta-analysis using only recent RNA-Seq data  
188 (F37/F43) and confirmed that similar DE genes and pathways were identified (**Fig S5**). In the  
189 following discussion we emphasize candidate genes for which there is evidence that expression  
190 diverged during the earliest generations.

191  
192 **Development:** The developmental meta-analyses were more dependent on data from  
193 earlier generations and produced less robust results. However, the top genes had consistent  
194 effects across age groups. Within the P7 meta-analysis, only one gene (out of 3,257), Neurocan  
195 (Ncan), was differentially expressed, with higher expression in bLRs than bHRs since an early  
196 generation (**Fig 4B-C**), in a manner that nominally persisted at P14 (**Fig 4D**). Within the P14  
197 and P21 meta-analysis, none of the effects survived multiple comparison correction (for 15,682  
198 and 3,257 genes, respectively). However, the top gene at P14, Bmp4, was consistently  
199 expressed at higher levels in bLRs than bHRs within both the P14 (**Fig 5A**) and adult datasets  
200 since the F4 generation (**Fig 5B**). We confirmed DE at these ages using qPCR (**Fig 5C, Fig**  
201 **S1**).

202

203 [FIGURE 4, FIGURE 5]

204

205

## 206 **Many bHR/bLR Differentially Expressed Genes Are Located Within Implicated**

### 207 **Chromosomal Regions**

208 Our exome sequencing study identified bHR/bLR segregating genetic variants, and then  
209 used a sampling of those variants to identify chromosomal regions that are likely to contribute to  
210 exploratory locomotor phenotype (QTL peaks). These implicated chromosomal regions  
211 overlapped extensively with QTLs relevant to internalizing/externalizing behavior (32), including

212 anxiety (47–52), stress response (53–55), and behavioral despair (56). In our current study,  
213 68% of the genes DE in adulthood (FDR<0.05) were within +/-1 MB of a bHR/bLR segregating  
214 variant, and 21% were within +/-100 kB of a highly segregating variant (Bonferonni-corrected  
215  $\alpha=5.00E-05$ ), a 4.7x enrichment compared to non-DE genes (**Fig 6A**, Fischer's exact test:  
216  $p=3.50E-06$ ). DE genes were also 4.5x more likely to be located within a QTL for exploratory  
217 locomotion (LOD>4; **Fig 6B**). This overlap included two genes previously associated with  
218 internalizing and externalizing behaviors (Thyrotropin Releasing Hormone Receptor (Trhr),  
219 Uncoupling Protein 2 (Ucp2), **Fig 6C**, (57–62)). These results fit our expectation that the  
220 influence of bHR/bLR segregating genetic variants on exploratory locomotion is at least partially  
221 mediated by effects on gene expression within the hippocampus.

222

223 [FIGURE 6]

224

## 225 **Positional Gene Enrichment Analysis Specifies Narrower Chromosomal Regions**

### 226 **Contributing to bHR/bLR Phenotype**

227 Positional Gene Enrichment (PGE) identified 132 chromosomal regions with a significant  
228 enrichment (FDR<0.05) of DE genes within the P14 and adult meta-analyses. We focused on  
229 the top regions (FDR<0.001; **Figure 6D**). We confirmed that most of these top loci (10/13) could  
230 be identified using recent RNA-Seq data (F37/F43), ruling out bias towards regions  
231 overrepresented on older microarray platforms. These 13 top loci were narrow chromosomal  
232 regions (measured in KB), but overlapped a strikingly high percentage of QTLs relevant to  
233 bHR/bLR phenotype. This overlap included three QTLs for exploratory activity (25),  
234 encompassing two DE genes associated with internalizing and externalizing behavior (Ucp2,  
235 Trhr; **Fig 7&8**), as well as 13% of the QTLs for anxiety (6/45, (47–50)), 21% of the QTLs for  
236 stress-related responses (8/38, (53–55,63–65)), and 23% of the QTLs for behavioral despair  
237 (3/13, (56)) in the Rat Genome Database (32). Therefore, these enriched loci could contain

238 genetic variants contributing to internalizing/externalizing aspects of the bHR/bLR behavioral  
239 phenotype beyond exploratory locomotion.

240

241 [ FIGURE 7, FIGURE 8]

242

243 **bHR/bLR Differential Expression is Enriched within Hippocampal Functional Pathways**

244

245 ***bHR/bLR Phenotype is Associated with Proliferation and Differentiation:*** Eight  
246 functional ontology gene sets (out of 2,761) showed an enrichment of DE within the P14 meta-  
247 analysis (FDR<0.05), all of which were upregulated in bLRs (**Fig 9A, Table S3, Fig S6**) and  
248 predominantly related to neurogenesis, differentiation, and brain development. Within the adult  
249 meta-analysis, 2 of the 4 top gene sets enriched with DE (FDR<0.1, out of 2,761 total) were  
250 similarly related to proliferation and development, but upregulated in bHRs. This pattern was  
251 confirmed using recent RNA-Seq data (F37/F43, **Table S3**), ruling out bias towards gene  
252 families overrepresented on microarray platforms.

253 A PPI network constructed using the top genes from the adult meta-analysis (FDR<0.10:  
254 192 genes) had a dominant subnetwork highlighting many of these same genes (**Fig 9B**),  
255 including hubs Bmp4 (*discussed above*) and the canonical marker of proliferation Mki67 (**Fig**  
256 **9C-E**). Literature review confirmed the PPI interactions within this subnetwork and their role in  
257 proliferation and differentiation in the brain (66–78).

258

259 [FIGURE 9]

260

261 ***bHR/bLR Phenotype is Associated with the Dentate Gyrus (DG):*** Similarly, when  
262 performing GSEA using 69 gene sets custom-designed to reflect hippocampal-specific cell  
263 types and networks (**Table S1**), we observed an enrichment of DE related to the DG (**Fig 8E**,

264 **Fig S7, Table S3**), the location of neural proliferation within the hippocampus. At P14, bLRs  
265 showed an upregulation of genes with enriched expression in the DG as compared to the Cornu  
266 Ammonis (CA) regions (40) (FDR<0.05). In adulthood, bHRs showed an upregulation of genes  
267 with enriched expression in the ventral compared to the dorsal DG (40) (FDR<0.05), including  
268 *Trhr* (FDR<0.05, *discussed above*).

269

### 270 ***bHR/bLR Phenotype is Associated with Hippocampal Co-expression Networks***

271 ***Related to Synaptic Signaling:*** Co-expression modules can capture regionally-important cell  
272 types and functions that remain undocumented in traditional ontology databases (79). We  
273 observed an enrichment of bHR/bLR effects within six previously identified hippocampal co-  
274 expression modules within the P14 meta-analysis (FDR<0.05) and five within the adult meta-  
275 analysis (FDR<0.05, **Fig 8E, Fig S7, Table S3**). Two of these modules included genes within  
276 implicated chromosomal regions.

277 The first was a large co-expression module (695 genes) previously identified in the  
278 mouse hippocampus ((39), *“lightcyan”*) which showed elevated expression in bLRs relative to  
279 bHRs at P14 (FDR<0.05) and adulthood (FDR<0.10). One of the top DE genes in this module,  
280 ETS Variant 4 (*Etv4*, FDR<0.05, bHR>bLR), is a transcription factor required for proper  
281 hippocampal dendrite development (80) located within an implicated chromosomal region (**Fig**  
282 **S8**). A PPI network constructed using the DE genes in this module (n=74, adult p<0.05), was  
283 enriched with genes related to cell projections, neurons, synapses, and cation binding  
284 (FDR<0.05).

285 The second was a small co-expression module (39 genes) previously identified in the  
286 mouse hippocampus ((39), *sienna3*), which showed elevated expression in bHRs in adulthood  
287 (FDR<0.05). The top gene in this module was *Trhr* (*discussed above*). A PPI network  
288 constructed using all 39 genes in this module centered on *Trhr* and its ligand, thyrotropin  
289 releasing hormone (*Trh*; **Fig 8G**), and included many reward-related signaling molecules,

290 including CART prepropeptide (Cartpt (81)), Oxytocin/Neurophysin I Prepropeptide (Oxt (82)),  
291 and Dopamine Receptor D1a (Drd1a (83,84)).

292

293 ***bHR/bLR Phenotype is Associated with Microglial and Endothelial-Specific Gene***

294 **Expression:** Our results suggested that bHR/bLR rats might have differences in hippocampal  
295 cell type composition. A cell type deconvolution analysis focused on well-characterized non-  
296 neuronal cell type categories revealed that bLRs had greater microglial-specific expression than  
297 bHRs at P14 and adulthood (**Fig 10A,C-D**). At P14, bLRs also showed greater endothelial-  
298 specific expression (**Fig 10B**). These effects could reflect differences in cell type composition or  
299 activation state. Notably, two of the top DE genes that were located within implicated  
300 chromosomal regions are regulators of microglial state: Milk fat globule-EGF factor 8 (Mfge8,  
301 **Fig 10E-H**) promotes alternative (M2) activation (85), and Complement component C1q A Chain  
302 (C1qa, **Fig 10I-L**) promotes classical activation (86). To interrogate less well-characterized  
303 hippocampal cell types, we compared our meta-analysis results to the new mousebrain.org  
304 database (87), and found that the top DE genes (FDR<0.10) were highly expressed in a variety  
305 of cell types, including neuronal subcategories (**Fig S9**), mirroring the diversity of hippocampal  
306 functions implicated in bHR/bLR phenotype.

307

308 [FIGURE 10]

309

310 **Discussion**

311

312 By selectively-breeding rats for over 16 years, we have produced a robust, genetic  
313 model of the co-occurrence of common internalizing and externalizing behaviors. Such large  
314 differences in behavior would be expected to be accompanied by similarly strong differences in  
315 gene expression in affective circuitry. By performing a formal meta-analysis across small,

316 exploratory datasets, we provide insight into bHR/bLR differences in hippocampal gene  
317 expression across development and adulthood. Further, by cross-referencing these results with  
318 our concurrent genetic study (25), we pinpoint strong candidates for mediating the influence of  
319 selective breeding on hippocampal function and internalizing/externalizing behavior.

320

321 ***Transcriptional profiling converges with genetic results to identify two strong candidates***  
322 ***for contributing to bHR/bLR behavioral phenotype: Trhr and Ucp2***

323 Our exome sequencing study offered a first glimpse of the genetic factors contributing to  
324 our selectively-bred phenotypes (25). However, the implicated chromosomal regions  
325 encompass several hundred genes, making their specific effects on gene expression and  
326 function difficult to predict. By cross-referencing these findings with our DE results, we  
327 discovered two strong candidates: Trhr and Ucp2. These candidates are located near bHR/bLR  
328 fully-segregating genetic variants (25) within narrow chromosomal regions highly enriched for  
329 DE genes, and overlap QTLs for exploratory activity (25), anxiety (47–49), and stress response  
330 (53,54). Trhr was also the top gene within a bHR-upregulated gene set associated with the  
331 ventral DG (40), a region important for proliferation and emotional regulation (18), and was a  
332 hub in a bHR-upregulated hippocampal network containing reward-related signaling molecules.

333 Trhr and Ucp2 are both important for energy metabolism and extensively linked to  
334 internalizing and externalizing behavior (88–90). Knocking out Ucp2 produces a bLR-like  
335 phenotype: higher anxiety-like behavior, lower locomotor activity, and reduced stress resilience  
336 (57,58,60,61). Trhr is an important component of the hypothalamic-pituitary-thyroid (HPT) axis  
337 and regulates anxiety and depressive-like behavior (59,62,91). In our exome-sequencing study,  
338 the variants associated with Trhr and Ucp2 explained a moderate portion of exploratory  
339 locomotor behavior (<10%, approximately 200 locomotor counts, (25)) – a magnitude akin to the  
340 bHR/bLR difference in locomotor score present in the F1 generation. Altogether, this evidence  
341 suggests that bHR/bLR segregating genetic variants are driving DE of Ucp2 and Trhr in a

342 manner that could meaningfully contribute to bHR/bLR differences in hippocampal function and  
343 internalizing/externalizing behavior.

344

345 ***The top genes identified in the developmental meta-analyses suggest that bHR/bLR***  
346 ***differences in hippocampal structure arise early in development: Ncan and Bmp4***

347 The different propensity of bHR/bLR rats towards externalizing or internalizing behavior  
348 is evident at a young age (14,15), paralleling hippocampal development (14). Our meta-  
349 analyses encompassed three postnatal ages (P7, P14, and P21) to provide insight into this  
350 neurodevelopmental trajectory. These meta-analyses depended on data from earlier  
351 generations and older transcriptional profiling platforms yet identified two strong candidates with  
352 clear associations with internalizing/externalizing behavior and hippocampal development.

353 The top P7 result was Ncan, exhibiting a strikingly large effect size (bHR<bLR) as early  
354 as generation F6. Ncan is located adjacent to a bHR/bLR segregating variant (25), overlapping  
355 a QTL for despair-related behavior (56). As part of the extracellular matrix, Ncan is upregulated  
356 during early brain development (92,93) and modulates cell adhesion, migration, and growth  
357 factor binding (94). Ncan has been linked to Bipolar Disorder (92), and knocking-out Ncan  
358 enhances locomotor activity, risk-taking, hedonia, and amphetamine hypersensitivity (93).  
359 Therefore, lower levels of Ncan in early development in bHRs could promote externalizing  
360 behavior as well as divergent hippocampal development.

361 The top P14 result was Bmp4, which was elevated in bLRs since the earliest  
362 generations in a manner that appeared to persist into adulthood. As a regulator of development,  
363 Bmp4 is initially important for neural induction (95,96), but later suppresses neurogenesis (97–  
364 101) and promotes other cell fates (78,95,102). Bmp4 was an important driver in bHR/bLR-  
365 enriched gene sets related to proliferation and differentiation at P14 and a hub in a related PPI  
366 network constructed from top adult DE genes. In the hippocampus, Bmp signaling promotes



367 dorsal cell type identity and is essential for DG formation (103), matching our results indicating  
368 bLR-enrichment of gene expression related to the DG at P14 and adulthood.

369         Moreover, blocking Bmp signaling can produce a bHR-like phenotype, reducing anxiety,  
370 fear conditioning, and depressive-like behavior (98,103). Therefore, Bmp4 is a strong candidate  
371 for driving long-term structural differences in the hippocampus capable of producing stable  
372 differences in temperament. However, Bmp4 was not located near a bHR/bLR segregating  
373 variant in our exome sequencing study (25), implying that impactful variation may be located in  
374 a nearby non-coding region or within a gene upstream in Bmp4's signaling pathway.

375

376 ***Functional analyses implicate hippocampal proliferation and differentiation in bHR/bLR***  
377 ***phenotype***

378         One of the most prominent themes in our results were functions related to cell  
379 proliferation and differentiation. Indeed, we found that Mki67 itself contained two bHR/bLR  
380 segregating genetic variants, and was more highly expressed in bLRs in adulthood (FDR<0.05),  
381 matching the upregulation in bLRs observed histologically in development (14) and maybe  
382 adulthood (9,104). These findings confirm that the relationship between internalizing behavior  
383 and cell proliferation in our model is unlikely to be as simple as a general stunting of growth-  
384 related processes, as suggested by the neurotrophic model of stress-related mood disorders  
385 (105).

386         Many of our top DE genes were also important regulators of cell fate. Bmp4, SRY-box 9  
387 (Sox9), SRY-box 2 (Sox2), Hes Family BHLH Transcription Factor 5 (Hes5), CD24 Molecule  
388 (Cd24), and TEK Receptor Tyrosine Kinase (Tek) regulate functions such as the developmental  
389 progression of neural differentiation, gliogenesis, and endothelial proliferation (66,74,75,77,106–  
390 108). Their role in adulthood includes growth and plasticity in response to neural activity and  
391 injury (69,109–111). Therefore, these results could explain previous morphological findings  
392 indicating that cell differentiation progressed differently in the adult hippocampus in bHRs and

393 bLRs under conditions of mild stress (9). Together, these findings raise the interesting possibility  
394 that DE within neurodevelopmental programming pathways could provide a general mechanism  
395 by which environmental stimuli, such as stress or drugs, produces divergent changes in  
396 hippocampal structure in bHR/bLR animals.

397

### 398 ***Functional analyses implicate microglial activation in bHR/bLR phenotype***

399 Microglial-specific gene expression was upregulated at both P14 and adulthood in bLRs,  
400 suggesting either an increased proportion of microglia cells or microglial activation. Several top  
401 candidate genes were important regulators of microglial function. bLRs had greater expression  
402 of C1qa than bHRs since the earliest generations. The C1q genes promote classical microglial  
403 activation (86) and are implicated in phagocytosis-driven synaptic pruning (86,112,113). In  
404 contrast, Mfge8 was more expressed in bHRs. Mfge8 is associated with reduced pro-  
405 inflammatory factors (114) as well as alternative (M2) microglial activation (85), playing an  
406 important role in phagocytosis (85,115,116). Ucp2, discussed previously, has anti-inflammatory  
407 function (57,58,60,117,118) and was more highly expressed in bHRs than bLRs. Both Mfge8  
408 and Ucp2 contain bHR/bLR segregating genetic variants within probable QTLs for exploratory  
409 activity (25), suggesting that genetic variation could contribute to their DE in the hippocampus.

410 Together, these results seem to fit pro-inflammatory theories of internalizing disorders  
411 (119). However, we found little evidence of bHR/bLR differences in the expression of traditional  
412 inflammatory markers. Therefore, it seems more likely that bHR/bLR differences in microglial  
413 activation genes are tied to non-immune roles for microglia within the brain, including the  
414 regulation of neurogenesis, cell survival (120), and synaptic pruning (113,121) in response to  
415 neuronal activity (113). Therefore, microglial phagocytosis could be serving as a multi-faceted  
416 tool to tailor plasticity either during development, or in response to environmental stimuli like  
417 stress or drugs of abuse.

418

419 **Conclusion and Future Directions**

420 By comparing exome sequencing findings to hippocampal differential expression  
421 patterns during development and adulthood across many generations of selective breeding in  
422 our bHR/bLR colony, we implicate a diverse and compelling array of genes whose effects may  
423 converge to promote internalizing and externalizing behavior. Due to a dependence of our  
424 results on older platforms and exclusively male rats, we cannot claim to have identified all  
425 relevant candidates, nor have we highlighted all promising results in our text. However, we  
426 implicate two functional pathways with the capability to guide bHRs and bLRs along a divergent  
427 developmental trajectory and set the stage for a widely different reactivity to the environment.  
428 These findings will inspire new avenues of research (122–124), including cell type specific  
429 morphological analyses and the manipulation of candidate pathways to assess relevance to  
430 behavioral and neurological phenotype in our model.

431

432

433

434

**Acknowledgements**

435

436 The work that was performed at the Molecular Behavioral Neuroscience Institute was  
437 supported by the following grants: Hope for Depression Research Foundation (HDRF; RGA#  
438 DTF Phase II (D) (McEwen- PI)), Pritzker Neuropsychiatric Disorders Research Consortium,  
439 National Institute on Drug Abuse Grants 5P01 DA021633-02, NIDA (5RO1 DA013386), Office of  
440 Naval Research Grant N00014-12-1-0366, Office of Naval Research (ONR) N00014-09-1-0598,  
441 Office of Naval Research (ONR) N00014-02-1-0879, NIMH Conte Center Grant #L99MH60398,  
442 and NIMH Program Project Grant #P01MH42251-01. The University of Alabama study was  
443 funded by NIMH 4R00MH085859-02 (S.M.C.). Research training for I.B. was supported by the  
444 Undergraduate Research Opportunity Program at the University of Michigan. We would also

445 like to acknowledge everyone involved in the studies included in the meta-analysis: James  
446 Stewart, Angela Koelsch, Sharon Burke, Mary Hoverstein, Jennifer Fitzpatrick, Hui Li, Fei Li,  
447 and Amy Tang, the University of Michigan Advanced Genomics Core, and HudsonAlpha  
448 Institute for Biotechnology Genomics Services Lab. Finally, we thank everyone who has  
449 provided feedback on the manuscript: Dr. Shelly Flagel, Alek Pankonin, Pouya Mandi Gholami,  
450 Dr. Aram Parsegian, and Leah Johnson.

451

452

453

### Disclosures

454

455 These results were previously published in pre-print format (*bioRxiv* 774034; doi:  
456 <https://doi.org/10.1101/774034>). Several of the authors are members of the Pritzker  
457 Neuropsychiatric Disorders Research Consortium (MHH, RCT, FM, HA, SJW), which is  
458 supported by Pritzker Neuropsychiatric Disorders Research Fund, LLC. A shared intellectual  
459 property agreement exists between the academic and philanthropic entities of the consortium.  
460 The authors have declared that no competing interests exist.

461

462  
463  
464  
465  
466  
467  
468  
469  
470  
471  
472  
473  
474  
475  
476  
477  
478  
479  
480  
481  
482  
483  
484

## Works Cited

1. Krueger RF, Markon KE (2006): Reinterpreting comorbidity: a model-based approach to understanding and classifying psychopathology. *Annu Rev Clin Psychol* 2: 111–133.
2. Smoller JW (2016): The Genetics of Stress-Related Disorders: PTSD, Depression, and Anxiety Disorders. *Neuropsychopharmacology* 41: 297–319.
3. Wray NR, Ripke S, Mattheisen M, Trzaskowski M, Byrne EM, Abdellaoui A, *et al.* (2018): Genome-wide association analyses identify 44 risk variants and refine the genetic architecture of major depression. *Nat Genet* 50: 668–681.
4. Aydin C, Frohmader K, Akil H (2015): Revealing a latent variable: individual differences in affective response to repeated injections. *Behav Neurosci* 129: 679–682.
5. Chaudhury S, Aurbach EL, Sharma V, Blandino P, Turner CA, Watson SJ, Akil H (2014): FGF2 is a target and a trigger of epigenetic mechanisms associated with differences in emotionality: Partnership with H3K9me3. *Proc Natl Acad Sci U S A* 111: 11834–11839.
6. Clinton SM, Vazquez DM, Kabbaj M, Kabbaj M-H, Watson SJ, Akil H (2007): Individual differences in novelty-seeking and emotional reactivity correlate with variation in maternal behavior. *Horm Behav* 51: 655–664.
7. Flagel SB, Robinson TE, Clark JJ, Clinton SM, Watson SJ, Seeman P, *et al.* (2010): An animal model of genetic vulnerability to behavioral disinhibition and responsiveness to reward-related cues: implications for addiction. *Neuropsychopharmacology* 35: 388–400.
8. Flagel SB, Waselus M, Clinton SM, Watson SJ, Akil H (2014): Antecedents and consequences of drug abuse in rats selectively bred for high and low response to novelty. *Neuropharmacology* 76 Pt B: 425–436.

- 485 9. Perez JA, Clinton SM, Turner CA, Watson SJ, Akil H (2009): A New Role for FGF2 as an Endogenous  
486 Inhibitor of Anxiety. *J Neurosci* 29: 6379–6387.
- 487 10. Prater KE, Aurbach EL, Larcinese HK, Smith TN, Turner CA, Blandino P, *et al.* (2017): Selectively Bred  
488 Rats Provide a Unique Model of Vulnerability to PTSD-Like Behavior and Respond Differentially  
489 to FGF2 Augmentation Early in Life. *Neuropsychopharmacology* 42: 1706–1714.
- 490 11. Stead JDH, Clinton S, Neal C, Schneider J, Jama A, Miller S, *et al.* (2006): Selective breeding for  
491 divergence in novelty-seeking traits: Heritability and enrichment in spontaneous anxiety-related  
492 behaviors. *Behav Genet* 36: 697–712.
- 493 12. Stedenfeld KA, Clinton SM, Kerman IA, Akil H, Watson SJ, Sved AF (2011): Novelty-seeking behavior  
494 predicts vulnerability in a rodent model of depression. *Physiol Behav* 103: 210–216.
- 495 13. Turner CA, Clinton SM, Thompson RC, Watson SJ, Akil H (2011): Fibroblast growth factor-2 (FGF2)  
496 augmentation early in life alters hippocampal development and rescues the anxiety phenotype  
497 in vulnerable animals. *Proc Natl Acad Sci U S A* 108: 8021–8025.
- 498 14. Clinton SM, Stead JDH, Miller S, Watson SJ, Akil H (2011): Developmental underpinnings of  
499 differences in rodent novelty-seeking and emotional reactivity. *Eur J Neurosci* 34: 994–1005.
- 500 15. Turner CA, Hagenauer MH, Aurbach EL, Maras PM, Fournier CL, Blandino P, *et al.* (2019): Effects of  
501 early-life FGF2 on ultrasonic vocalizations (USVs) and the mu-opioid receptor in male Sprague-  
502 Dawley rats selectively-bred for differences in their response to novelty. *Brain Res* 1715: 106–  
503 114.
- 504 16. Robinson JL, Kagan J, Reznick JS, Corley R (1992): The heritability of inhibited and uninhibited  
505 behavior: A twin study. *Developmental Psychology* 28: 1030–1037.
- 506 17. Turner CA, Flagel SB, Blandino P, Watson SJ, Akil H (2017): Utilizing a unique animal model to better  
507 understand human temperament. *Curr Opin Behav Sci* 14: 108–114.

- 508 18. Fanselow MS, Dong H-W (2010): Are the dorsal and ventral hippocampus functionally distinct  
509 structures? *Neuron* 65: 7–19.
- 510 19. Gray JA (1982): *The Neuropsychology of Anxiety: An Enquiry into the Functions of the Septo-*  
511 *Hippocampal System*. New York, NY, US: Clarendon Press/Oxford University Press.
- 512 20. Papez JW (1937): A proposed mechanism of emotion. *Archives of Neurology & Psychiatry* 38: 725–  
513 743.
- 514 21. Campbell S, Macqueen G (2004): The role of the hippocampus in the pathophysiology of major  
515 depression. *J Psychiatry Neurosci* 29: 417–426.
- 516 22. Gerlach JL, McEwen BS (1972): Rat brain binds adrenal steroid hormone: radioautography of  
517 hippocampus with corticosterone. *Science* 175: 1133–1136.
- 518 23. Clinton S, Miller S, Watson SJ, Akil H (2008): Prenatal stress does not alter innate novelty-seeking  
519 behavioral traits, but differentially affects individual differences in neuroendocrine stress  
520 responsiveness. *Psychoneuroendocrinology* 33: 162–177.
- 521 24. Kabbaj M, Devine DP, Savage VR, Akil H (2000): Neurobiological correlates of individual differences in  
522 novelty-seeking behavior in the rat: differential expression of stress-related molecules. *J*  
523 *Neurosci* 20: 6983–6988.
- 524 25. Zhou Z, Blandino P, Yuan Q, Shen P-H, Hodgkinson CA, Virkkunen M, *et al.* (2019): Exploratory  
525 locomotion, a predictor of addiction vulnerability, is oligogenic in rats selected for this  
526 phenotype. *Proc Natl Acad Sci USA* 116: 13107–13115.
- 527 26. Aurbach EL, Inui EG, Turner CA, Hagenauer MH, Prater KE, Li JZ, *et al.* (2015): Fibroblast growth  
528 factor 9 is a novel modulator of negative affect. *Proc Natl Acad Sci USA* 112: 11953–11958.
- 529 27. Isgor C, Kabbaj M, Akil H, Watson SJ (2004): Delayed effects of chronic variable stress during  
530 peripubertal-juvenile period on hippocampal morphology and on cognitive and stress axis  
531 functions in rats. *Hippocampus* 14: 636–648.

- 532 28. Cohen JL, Glover ME, Pugh PC, Fant AD, Simmons RK, Akil H, *et al.* (2015): Maternal Style Selectively  
533 Shapes Amygdalar Development and Social Behavior in Rats Genetically Prone to High Anxiety.  
534 *Dev Neurosci* 37: 203–214.
- 535 29. Irizarry RA, Hobbs B, Collin F, Beazer-Barclay YD, Antonellis KJ, Scherf U, Speed TP (2003):  
536 Exploration, normalization, and summaries of high density oligonucleotide array probe level  
537 data. *Biostatistics* 4: 249–264.
- 538 30. Viechtbauer W (2010): Conducting Meta-Analyses in R with The metafor Package. *Journal of*  
539 *Statistical Software* 36. <https://doi.org/10.18637/jss.v036.i03>
- 540 31. Pollard KS, Dudoit S, Laan MJ van der (2005): Multiple Testing Procedures: the multtest Package and  
541 Applications to Genomics. *Bioinformatics and Computational Biology Solutions Using R and*  
542 *Bioconductor*. Springer, New York, NY, pp 249–271.
- 543 32. Shimoyama M, De Pons J, Hayman GT, Laulederkind SJF, Liu W, Nigam R, *et al.* (2015): The Rat  
544 Genome Database 2015: genomic, phenotypic and environmental variations and disease.  
545 *Nucleic Acids Res* 43: D743-750.
- 546 33. De Preter K, Barriot R, Speleman F, Vandesompele J, Moreau Y (2008): Positional gene enrichment  
547 analysis of gene sets for high-resolution identification of overrepresented chromosomal regions.  
548 *Nucleic Acids Res* 36: e43.
- 549 34. Mootha VK, Lindgren CM, Eriksson K-F, Subramanian A, Sihag S, Lehar J, *et al.* (2003): PGC-1alpha-  
550 responsive genes involved in oxidative phosphorylation are coordinately downregulated in  
551 human diabetes. *Nat Genet* 34: 267–273.
- 552 35. Subramanian A, Tamayo P, Mootha VK, Mukherjee S, Ebert BL, Gillette MA, *et al.* (2005): Gene set  
553 enrichment analysis: a knowledge-based approach for interpreting genome-wide expression  
554 profiles. *Proc Natl Acad Sci USA* 102: 15545–15550.



- 555 36. Sergushichev A (2016): An algorithm for fast preranked gene set enrichment analysis using  
556 cumulative statistic calculation. *bioRxiv*. <https://doi.org/10.1101/060012>
- 557 37. Powell JAC (2014): GO2MSIG, an automated GO based multi-species gene set generator for gene set  
558 enrichment analysis. *BMC Bioinformatics* 15: 146.
- 559 38. Johnson MR, Shkura K, Langley SR, Delahaye-Duriez A, Srivastava P, Hill WD, *et al.* (2016): Systems  
560 genetics identifies a convergent gene network for cognition and neurodevelopmental disease.  
561 *Nat Neurosci* 19: 223–232.
- 562 39. Park CC, Gale GD, de Jong S, Ghazalpour A, Bennett BJ, Farber CR, *et al.* (2011): Gene networks  
563 associated with conditional fear in mice identified using a systems genetics approach. *BMC Syst*  
564 *Biol* 5: 43.
- 565 40. Cembrowski MS, Wang L, Sugino K, Shields BC, Spruston N (2016): Hipposeq: a comprehensive RNA-  
566 seq database of gene expression in hippocampal principal neurons. *Elife* 5: e14997.
- 567 41. Szklarczyk D, Franceschini A, Wyder S, Forslund K, Heller D, Huerta-Cepas J, *et al.* (2015): STRING v10:  
568 protein-protein interaction networks, integrated over the tree of life. *Nucleic Acids Res* 43:  
569 D447-452.
- 570 42. Hagenauer MH, Schulmann A, Li JZ, Vawter MP, Walsh DM, Thompson RC, *et al.* (2018): Inference of  
571 cell type content from human brain transcriptomic datasets illuminates the effects of age,  
572 manner of death, dissection, and psychiatric diagnosis. *PLoS ONE* 13: e0200003.
- 573 43. Livak KJ, Schmittgen TD (2001): Analysis of relative gene expression data using real-time quantitative  
574 PCR and the 2<sup>-</sup>(Delta Delta C(T)) Method. *Methods* 25: 402–408.
- 575 44. Yuan JS, Reed A, Chen F, Stewart CN (2006): Statistical analysis of real-time PCR data. *BMC*  
576 *Bioinformatics* 7: 85.
- 577 45. Calvo N, Cecchi M, Kabbaj M, Watson SJ, Akil H (2011): Differential effects of social defeat in rats  
578 with high and low locomotor response to novelty. *Neuroscience* 183: 81–89.

- 579 46. Kabbaj M, Evans S, Watson SJ, Akil H (2004): The search for the neurobiological basis of vulnerability  
580 to drug abuse: using microarrays to investigate the role of stress and individual differences.  
581 *Neuropharmacology* 47 Suppl 1: 111–122.
- 582 47. Albert FW, Carlborg O, Plyusnina I, Besnier F, Hedwig D, Lautenschläger S, *et al.* (2009): Genetic  
583 architecture of tameness in a rat model of animal domestication. *Genetics* 182: 541–554.
- 584 48. Terenina-Rigaldie E, Moisan M-P, Colas A, Beaugé F, Shah KV, Jones BC, Mormède P (2003): Genetics  
585 of behaviour: phenotypic and molecular study of rats derived from high- and low-alcohol  
586 consuming lines. *Pharmacogenetics* 13: 543–554.
- 587 49. Conti LH, Jirout M, Breen L, Vanella JJ, Schork NJ, Printz MP (2004): Identification of quantitative trait  
588 Loci for anxiety and locomotion phenotypes in rat recombinant inbred strains. *Behav Genet* 34:  
589 93–103.
- 590 50. Baum AE, Solberg LC, Churchill GA, Ahmadiyeh N, Takahashi JS, Redei EE (2006): Test- and behavior-  
591 specific genetic factors affect WKY hypoactivity in tests of emotionality. *Behav Brain Res* 169:  
592 220–230.
- 593 51. Johannesson M, Lopez-Aumatell R, Stridh P, Diez M, Tuncel J, Blázquez G, *et al.* (2009): A resource  
594 for the simultaneous high-resolution mapping of multiple quantitative trait loci in rats: the NIH  
595 heterogeneous stock. *Genome Res* 19: 150–158.
- 596 52. Fernández-Teruel A, Escorihuela RM, Gray JA, Aguilar R, Gil L, Giménez-Llort L, *et al.* (2002): A  
597 quantitative trait locus influencing anxiety in the laboratory rat. *Genome Res* 12: 618–626.
- 598 53. Solberg LC, Baum AE, Ahmadiyeh N, Shimomura K, Li R, Turek FW, *et al.* (2006): Genetic analysis of  
599 the stress-responsive adrenocortical axis. *Physiol Genomics* 27: 362–369.
- 600 54. Yamazato M, Ohya Y, Nakamoto M, Sakima A, Tagawa T, Harada Y, *et al.* (2006): Sympathetic  
601 hyperreactivity to air-jet stress in the chromosome 1 blood pressure quantitative trait locus  
602 congenic rats. *Am J Physiol Regul Integr Comp Physiol* 290: R709-714.

Running Head: bHR/bLR Hippocampal Gene Expression Meta-Analysis

- 603 55. Llamas B, Contesse V, Guyonnet-Duperat V, Vaudry H, Mormède P, Moisan M-P (2005): QTL mapping  
604 for traits associated with stress neuroendocrine reactivity in rats. *Mamm Genome* 16: 505–515.
- 605 56. Solberg LC, Baum AE, Ahmadiyeh N, Shimomura K, Li R, Turek FW, *et al.* (2004): Sex- and lineage-  
606 specific inheritance of depression-like behavior in the rat. *Mamm Genome* 15: 648–662.
- 607 57. Du R-H, Wu F-F, Lu M, Shu X-D, Ding J-H, Wu G, Hu G (2016): Uncoupling protein 2 modulation of the  
608 NLRP3 inflammasome in astrocytes and its implications in depression. *Redox Biol* 9: 178–187.
- 609 58. Gimsa U, Kanitz E, Otten W, Aheng C, Tuchscherer M, Ricquier D, *et al.* (2011): Alterations in anxiety-  
610 like behavior following knockout of the uncoupling protein 2 (*ucp2*) gene in mice. *Life Sci* 89:  
611 677–684.
- 612 59. Pekary AE, Sattin A, Lloyd RL (2015): Ketamine modulates TRH and TRH-like peptide turnover in brain  
613 and peripheral tissues of male rats. *Peptides* 69: 66–76.
- 614 60. Sun X-L, Liu Y, Dai T, Ding J-H, Hu G (2011): Uncoupling protein 2 knockout exacerbates depression-  
615 like behaviors in mice via enhancing inflammatory response. *Neuroscience* 192: 507–514.
- 616 61. Wang D, Zhai X, Chen P, Yang M, Zhao J, Dong J, Liu H (2014): Hippocampal UCP2 is essential for  
617 cognition and resistance to anxiety but not required for the benefits of exercise. *Neuroscience*  
618 277: 36–44.
- 619 62. Zeng H, Schimpf BA, Rohde AD, Pavlova MN, Gragerov A, Bergmann JE (2007): Thyrotropin-releasing  
620 hormone receptor 1-deficient mice display increased depression and anxiety-like behavior. *Mol*  
621 *Endocrinol* 21: 2795–2804.
- 622 63. Xiao B, Harada Y, Kawakami K, Nabika T (2011): A 1.8-Mbp fragment on chromosome 1 affects  
623 sympathetic response to stress: evaluation in reciprocal congenic strains between stroke-prone  
624 spontaneously hypertensive rat and Wistar-Kyoto rat. *J Hypertens* 29: 257–265.
- 625 64. Klimes I, Weston K, Gasperíková D, Kovács P, Kvetnanský R, Jezová D, *et al.* (2005): Mapping of  
626 genetic determinants of the sympathoneural response to stress. *Physiol Genomics* 20: 183–187.

- 627 65. Potenza MN, Brodtkin ES, Joe B, Luo X, Remmers EF, Wilder RL, *et al.* (2004): Genomic regions  
628 controlling corticosterone levels in rats. *Biol Psychiatry* 55: 634–641.
- 629 66. Belvindrah R, Rougon G, Chazal G (2002): Increased neurogenesis in adult mCD24-deficient mice. *J*  
630 *Neurosci* 22: 3594–3607.
- 631 67. Cerezo A, Guadamillas MC, Goetz JG, Sánchez-Perales S, Klein E, Assoian RK, del Pozo MA (2009): The  
632 absence of caveolin-1 increases proliferation and anchorage- independent growth by a Rac-  
633 dependent, Erk-independent mechanism. *Mol Cell Biol* 29: 5046–5059.
- 634 68. Galach M (2014): Molecular mechanisms involved in epithelial differentiation of human induced  
635 pluripotent stem cells [Dissertation]. <https://doi.org/DOI:10.11588/heidok.00017870>
- 636 69. Head BP, Peart JN, Panneerselvam M, Yokoyama T, Pearn ML, Niesman IR, *et al.* (2010): Loss of  
637 caveolin-1 accelerates neurodegeneration and aging. *PLoS ONE* 5: e15697.
- 638 70. Hossain MB, Shifat R, Li J, Luo X, Hess KR, Rivera-Molina Y, *et al.* (2017): TIE2 Associates with  
639 Caveolae and Regulates Caveolin-1 To Promote Their Nuclear Translocation. *Mol Cell Biol* 37.  
640 <https://doi.org/10.1128/MCB.00142-17>
- 641 71. Jo A, Denduluri S, Zhang B, Wang Z, Yin L, Yan Z, *et al.* (2014): The versatile functions of Sox9 in  
642 development, stem cells, and human diseases. *Genes Dis* 1: 149–161.
- 643 72. Li X-L, Liu L, Li D-D, He Y-P, Guo L-H, Sun L-P, *et al.* (2017): Integrin  $\beta$ 4 promotes cell invasion and  
644 epithelial-mesenchymal transition through the modulation of Slug expression in hepatocellular  
645 carcinoma. *Sci Rep* 7: 40464.
- 646 73. Liu C, Goswami M, Talley J, Chesser-Martinez PL, Lou C-H, Sater AK (2012): TAK1 promotes  
647 BMP4/Smad1 signaling via inhibition of erk MAPK: a new link in the FGF/BMP regulatory  
648 network. *Differentiation* 83: 210–219.

- 649 74. Panaliappan TK, Wittmann W, Jidigam VK, Mercurio S, Bertolini JA, Sghari S, *et al.* (2018): Sox2 is  
650 required for olfactory pit formation and olfactory neurogenesis through BMP restriction and  
651 Hes5 upregulation. *Development* 145. <https://doi.org/10.1242/dev.153791>
- 652 75. Poché RA, Furuta Y, Chaboissier M-C, Schedl A, Behringer RR (2008): Sox9 is expressed in mouse  
653 multipotent retinal progenitor cells and functions in Müller glial cell development. *J Comp*  
654 *Neurol* 510: 237–250.
- 655 76. Shakiba N, White CA, Lipsitz YY, Yachie-Kinoshita A, Tonge PD, Hussein SMI, *et al.* (2015): CD24 tracks  
656 divergent pluripotent states in mouse and human cells. *Nat Commun* 6: 7329.
- 657 77. Stolt CC, Lommes P, Sock E, Chaboissier M-C, Schedl A, Wegner M (2003): The Sox9 transcription  
658 factor determines glial fate choice in the developing spinal cord. *Genes Dev* 17: 1677–1689.
- 659 78. Suzuki Y, Montagne K, Nishihara A, Watabe T, Miyazono K (2008): BMPs promote proliferation and  
660 migration of endothelial cells via stimulation of VEGF-A/VEGFR2 and angiopoietin-1/Tie2  
661 signalling. *J Biochem* 143: 199–206.
- 662 79. Oldham MC, Konopka G, Iwamoto K, Langfelder P, Kato T, Horvath S, Geschwind DH (2008):  
663 Functional organization of the transcriptome in human brain. *Nat Neurosci* 11: 1271–1282.
- 664 80. Fontanet PA, Ríos AS, Alsina FC, Paratcha G, Ledda F (2018): Pea3 Transcription Factors, Etv4 and  
665 Etv5, Are Required for Proper Hippocampal Dendrite Development and Plasticity. *Cereb Cortex*  
666 28: 236–249.
- 667 81. Jaworski JN, Jones DC (2006): The role of CART in the reward/reinforcing properties of  
668 psychostimulants. *Peptides* 27: 1993–2004.
- 669 82. Young LJ, Wang Z (2004): The neurobiology of pair bonding. *Nat Neurosci* 7: 1048–1054.
- 670 83. Higa KK, Young JW, Ji B, Nichols DE, Geyer MA, Zhou X (2017): Striatal dopamine D1 receptor  
671 suppression impairs reward-associative learning. *Behav Brain Res* 323: 100–110.

- 672 84. Milienne-Petiot M, Groenink L, Minassian A, Young JW (2017): Blockade of dopamine D1-family  
673 receptors attenuates the mania-like hyperactive, risk-preferring, and high motivation behavioral  
674 profile of mice with low dopamine transporter levels. *J Psychopharmacol (Oxford)* 31: 1334–  
675 1346.
- 676 85. Spittau B, Rilka J, Steinfath E, Zöller T, Krieglstein K (2015): TGF $\beta$ 1 increases microglia-mediated  
677 engulfment of apoptotic cells via upregulation of the milk fat globule-EGF factor 8. *Glia* 63: 142–  
678 153.
- 679 86. Kettenmann H, Kirchhoff F, Verkhratsky A (2013): Microglia: new roles for the synaptic stripper.  
680 *Neuron* 77: 10–18.
- 681 87. Zeisel A, Hochgerner H, Lonnerberg P, Johnsson A, Memic F, Zwan J van der, *et al.* (2018): Molecular  
682 architecture of the mouse nervous system. *bioRxiv* 294918.
- 683 88. Fischer S, Ehlert U (2018): Hypothalamic-pituitary-thyroid (HPT) axis functioning in anxiety disorders.  
684 A systematic review. *Depress Anxiety* 35: 98–110.
- 685 89. Maes M, Vandewoude M, Maes L, Schotte C, Cosyns P (1989): A revised interpretation of the TRH  
686 test results in female depressed patients. Part I: TSH responses. Effects of severity of illness,  
687 thyroid hormones, monoamines, age, sex hormonal, corticosteroid and nutritional state. *J Affect*  
688 *Disord* 16: 203–213.
- 689 90. Lanni A, Moreno M, Lombardi A, Goglia F (2003): Thyroid hormone and uncoupling proteins. *FEBS*  
690 *Lett* 543: 5–10.
- 691 91. Choi J, Kim J, Kim T-K, Park J-Y, Lee J-E, Kim H, *et al.* (2015): TRH and TRH receptor system in the  
692 basolateral amygdala mediate stress-induced depression-like behaviors. *Neuropharmacology*  
693 97: 346–356.

- 694 92. Cichon S, Mühleisen TW, Degenhardt FA, Mattheisen M, Miró X, Strohmaier J, *et al.* (2011): Genome-  
695 wide association study identifies genetic variation in neurocan as a susceptibility factor for  
696 bipolar disorder. *Am J Hum Genet* 88: 372–381.
- 697 93. Miró X, Meier S, Dreisow ML, Frank J, Strohmaier J, Breuer R, *et al.* (2012): Studies in humans and  
698 mice implicate neurocan in the etiology of mania. *Am J Psychiatry* 169: 982–990.
- 699 94. Rauch U, Feng K, Zhou XH (2001): Neurocan: a brain chondroitin sulfate proteoglycan. *Cell Mol Life*  
700 *Sci* 58: 1842–1856.
- 701 95. Cole AE, Murray SS, Xiao J (2016): Bone Morphogenetic Protein 4 Signalling in Neural Stem and  
702 Progenitor Cells during Development and after Injury. *Stem Cells Int* 2016: 9260592.
- 703 96. Harland R (2000): Neural induction. *Curr Opin Genet Dev* 10: 357–362.
- 704 97. Bond AM, Bhalala OG, Kessler JA (2012): The dynamic role of bone morphogenetic proteins in neural  
705 stem cell fate and maturation. *Dev Neurobiol* 72: 1068–1084.
- 706 98. Brooker SM, Gobeske KT, Chen J, Peng C-Y, Kessler JA (2017): Hippocampal bone morphogenetic  
707 protein signaling mediates behavioral effects of antidepressant treatment. *Mol Psychiatry* 22:  
708 910–919.
- 709 99. Gobeske KT, Das S, Bonaguidi MA, Weiss C, Radulovic J, Disterhoft JF, Kessler JA (2009): BMP  
710 signaling mediates effects of exercise on hippocampal neurogenesis and cognition in mice. *PLoS*  
711 *ONE* 4: e7506.
- 712 100. Meyers EA, Gobeske KT, Bond AM, Jarrett JC, Peng C-Y, Kessler JA (2016): Increased bone  
713 morphogenetic protein signaling contributes to age-related declines in neurogenesis and  
714 cognition. *Neurobiol Aging* 38: 164–175.
- 715 101. Mira H, Andreu Z, Suh H, Lie DC, Jessberger S, Consiglio A, *et al.* (2010): Signaling through BMPRII  
716 regulates quiescence and long-term activity of neural stem cells in the adult hippocampus. *Cell*  
717 *Stem Cell* 7: 78–89.

- 718 102. Gomes WA, Mehler MF, Kessler JA (2003): Transgenic overexpression of BMP4 increases astroglial  
719 and decreases oligodendroglial lineage commitment. *Dev Biol* 255: 164–177.
- 720 103. Caronia G, Wilcoxon J, Feldman P, Grove EA (2010): Bone morphogenetic protein signaling in the  
721 developing telencephalon controls formation of the hippocampal dentate gyrus and modifies  
722 fear-related behavior. *J Neurosci* 30: 6291–6301.
- 723 104. García-Fuster MJ, Perez JA, Clinton SM, Watson SJ, Akil H (2010): Impact of cocaine on adult  
724 hippocampal neurogenesis in an animal model of differential propensity to drug abuse. *Eur J*  
725 *Neurosci* 31: 79–89.
- 726 105. Duman RS, Monteggia LM (2006): A neurotrophic model for stress-related mood disorders. *Biol*  
727 *Psychiatry* 59: 1116–1127.
- 728 106. Bansod S, Kageyama R, Ohtsuka T (2017): Hes5 regulates the transition timing of neurogenesis and  
729 gliogenesis in mammalian neocortical development. *Development* 144: 3156–3167.
- 730 107. Sakai D, Suzuki T, Osumi N, Wakamatsu Y (2006): Cooperative action of Sox9, Snail2 and PKA  
731 signaling in early neural crest development. *Development* 133: 1323–1333.
- 732 108. Sun W, Cornwell A, Li J, Peng S, Osorio MJ, Aalling N, *et al.* (2017): SOX9 Is an Astrocyte-Specific  
733 Nuclear Marker in the Adult Brain Outside the Neurogenic Regions. *J Neurosci* 37: 4493–4507.
- 734 109. Ming G-L, Song H (2011): Adult neurogenesis in the mammalian brain: significant answers and  
735 significant questions. *Neuron* 70: 687–702.
- 736 110. Fuller ML, DeChant AK, Rothstein B, Caprariello A, Wang R, Hall AK, Miller RH (2007): Bone  
737 morphogenetic proteins promote gliosis in demyelinating spinal cord lesions. *Ann Neurol* 62:  
738 288–300.
- 739 111. Yan H, Zhu X, Xie J, Zhao Y, Liu X (2016):  $\beta$ -amyloid increases neurocan expression through  
740 regulating Sox9 in astrocytes: A potential relationship between Sox9 and chondroitin sulfate  
741 proteoglycans in Alzheimer’s disease. *Brain Res* 1646: 377–383.



- 742 112. Schafer DP, Stevens B (2015): Microglia Function in Central Nervous System Development and  
743 Plasticity. *Cold Spring Harb Perspect Biol* 7: a020545.
- 744 113. Wu Y, Dissing-Olesen L, MacVicar BA, Stevens B (2015): Microglia: Dynamic Mediators of Synapse  
745 Development and Plasticity. *Trends Immunol* 36: 605–613.
- 746 114. Albus E, Sinnigen K, Winzer M, Thiele S, Baschant U, Hannemann A, *et al.* (2016): Milk Fat Globule-  
747 Epidermal Growth Factor 8 (MFG-E8) Is a Novel Anti-inflammatory Factor in Rheumatoid  
748 Arthritis in Mice and Humans. *J Bone Miner Res* 31: 596–605.
- 749 115. Fricker M, Neher JJ, Zhao J-W, Théry C, Tolkovsky AM, Brown GC (2012): MFG-E8 mediates primary  
750 phagocytosis of viable neurons during neuroinflammation. *J Neurosci* 32: 2657–2666.
- 751 116. Fuller AD, Van Eldik LJ (2008): MFG-E8 regulates microglial phagocytosis of apoptotic neurons. *J*  
752 *Neuroimmune Pharmacol* 3: 246–256.
- 753 117. Vogler S, Pahnke J, Rousset S, Ricquier D, Moch H, Miroux B, Ibrahim SM (2006): Uncoupling protein  
754 2 has protective function during experimental autoimmune encephalomyelitis. *Am J Pathol* 168:  
755 1570–1575.
- 756 118. Arsenijevic D, Onuma H, Pecqueur C, Raimbault S, Manning BS, Miroux B, *et al.* (2000): Disruption  
757 of the uncoupling protein-2 gene in mice reveals a role in immunity and reactive oxygen species  
758 production. *Nat Genet* 26: 435–439.
- 759 119. Jo WK, Zhang Y, Emrich HM, Dietrich DE (2015): Glia in the cytokine-mediated onset of depression:  
760 fine tuning the immune response. *Front Cell Neurosci* 9: 268.
- 761 120. Sato K (2015): Effects of Microglia on Neurogenesis. *Glia* 63: 1394–1405.
- 762 121. Mastellos DC (2014): Complement emerges as a masterful regulator of CNS homeostasis, neural  
763 synaptic plasticity and cognitive function. *Exp Neurol* 261: 469–474.

- 764 122. Maras PM, Daugherty J, Hebda-Bauer E, Watson SJ, Akil H (2018): Minocycline treatment reduces  
765 anxiety- and depressive-like behaviors in a genetic model of internalizing mood disorders.  
766 *Neuroscience Meeting Planner* Program No. 234.03.
- 767 123. Hilde KL, Hagenauer MH, Stefanov AV, Birt I, Hebda-Bauer E, Watson SJ, Akil H (2018): Mechanisms  
768 of hippocampal development: Molecular and cellular phenotypes in the selectively bred high-  
769 responder/low-responder model of affective disorders. *Neuroscience Meeting Planner* Program  
770 No. 233.04.
- 771 124. O'Connor AM, Pardo T, Birt I, Hagenauer MH, Maras PM, Prater KE, *et al.* (2018): The hippocampal  
772 glycome contributes to behavioural phenotype in a novel rodent model of mood disorders.  
773 *Neuroscience Meeting Planner* Program No. 233.01.
- 774 125. Clinton SM, Stead JDH, Miller S, Watson SJ, Akil H (2011): Developmental underpinnings of  
775 differences in rodent novelty-seeking and emotional reactivity. *Eur J Neurosci* 34: 994–1005.  
776

## Tables and Table Legends

|                           | MBNI_AffymetrixRae230_F4            | MBNI_AffymetrixRgU34A_F6                  | MBNI_AffymetrixRae230_F15           | MBNI_IlluminaRatRef12v1_F15   | MBNI_RNASeq_F29   | Alabama_Nimblegen_F34                | MBNI_RNASeq_F37    | MBNI_RNASeq_F43                      |
|---------------------------|-------------------------------------|-------------------------------------------|-------------------------------------|-------------------------------|-------------------|--------------------------------------|--------------------|--------------------------------------|
| <b>Generation</b>         | 4                                   | 6                                         | 15                                  | 15                            | 29                | 34                                   | 37                 | 43                                   |
| <b>Laboratory</b>         | MBNI                                | MBNI                                      | MBNI                                | MBNI                          | MBNI              | Alabama                              | MBNI               | MBNI                                 |
| <b>Lead Scientist</b>     | Dr. John Stead                      | Dr. Sarah Clinton                         | Dr. Sarah Clinton                   | Dr. Sarah Clinton             | Dr. Sarah Clinton | Dr. Sarah Clinton                    | Dr. Peter Blandino | Dr. Cigdem Aydin                     |
| <b>Age</b>                | Adult                               | P7, P14, P21                              | P14                                 | P14                           | P14, Adult        | P7, P14, P21, Adult                  | Adult              | Adult                                |
| <b>n per group</b>        | 6                                   | 6                                         | 6                                   | 6                             | 2                 | 5                                    | 6                  | 5                                    |
| <b>Platform</b>           | Affymetrix Rat Expression Set 230 A | Affymetrix Rat Genome (RG) U34A GeneChips | Affymetrix Rat Expression Set 230 A | Illumina RatRef-12v1 Beadchip | RNA-Seq           | NimbleGen Rat Gene Expression 12x135 | RNA-Seq            | RNA-Seq                              |
| <b>Tissue Extraction</b>  | Whole Hippocampus                   | Whole Hippocampus                         | Whole Hippocampus                   | Whole Hippocampus             | Whole Hippocampus | Dorsal Hippocampus Tissue Punch      | Whole Hippocampus  | Whole Hippocampus                    |
| <b>Exposure</b>           | Basal                               | Basal                                     | Basal                               | Basal                         | Basal             | Basal                                | Basal              | Vehicle Injections                   |
| <b>Behavioral Testing</b> | Basal                               | Basal                                     | Basal                               | Basal                         | Basal             | Basal                                | Locomotor, Anxiety | Social Interaction After Mild Stress |
| <b>GEO Data Release</b>   | GSE140596                           | GSE29552                                  | GSE140595                           | GSE140594                     | GSE140597         | GSE88874                             | GSE140598          | GSE140287                            |
| <b>Citation</b>           |                                     | Clinton <i>et al.</i> 2011                |                                     |                               |                   | Cohen <i>et al.</i> 2015             |                    |                                      |

**Table 1. An overview of the eight transcriptional profiling studies included in our current meta-analyses of differential gene expression in the bHR and bLR hippocampus at four developmental time points: P7, P14, P21, and adulthood. Citations: (28,125)**

## Figures and Figure Legends

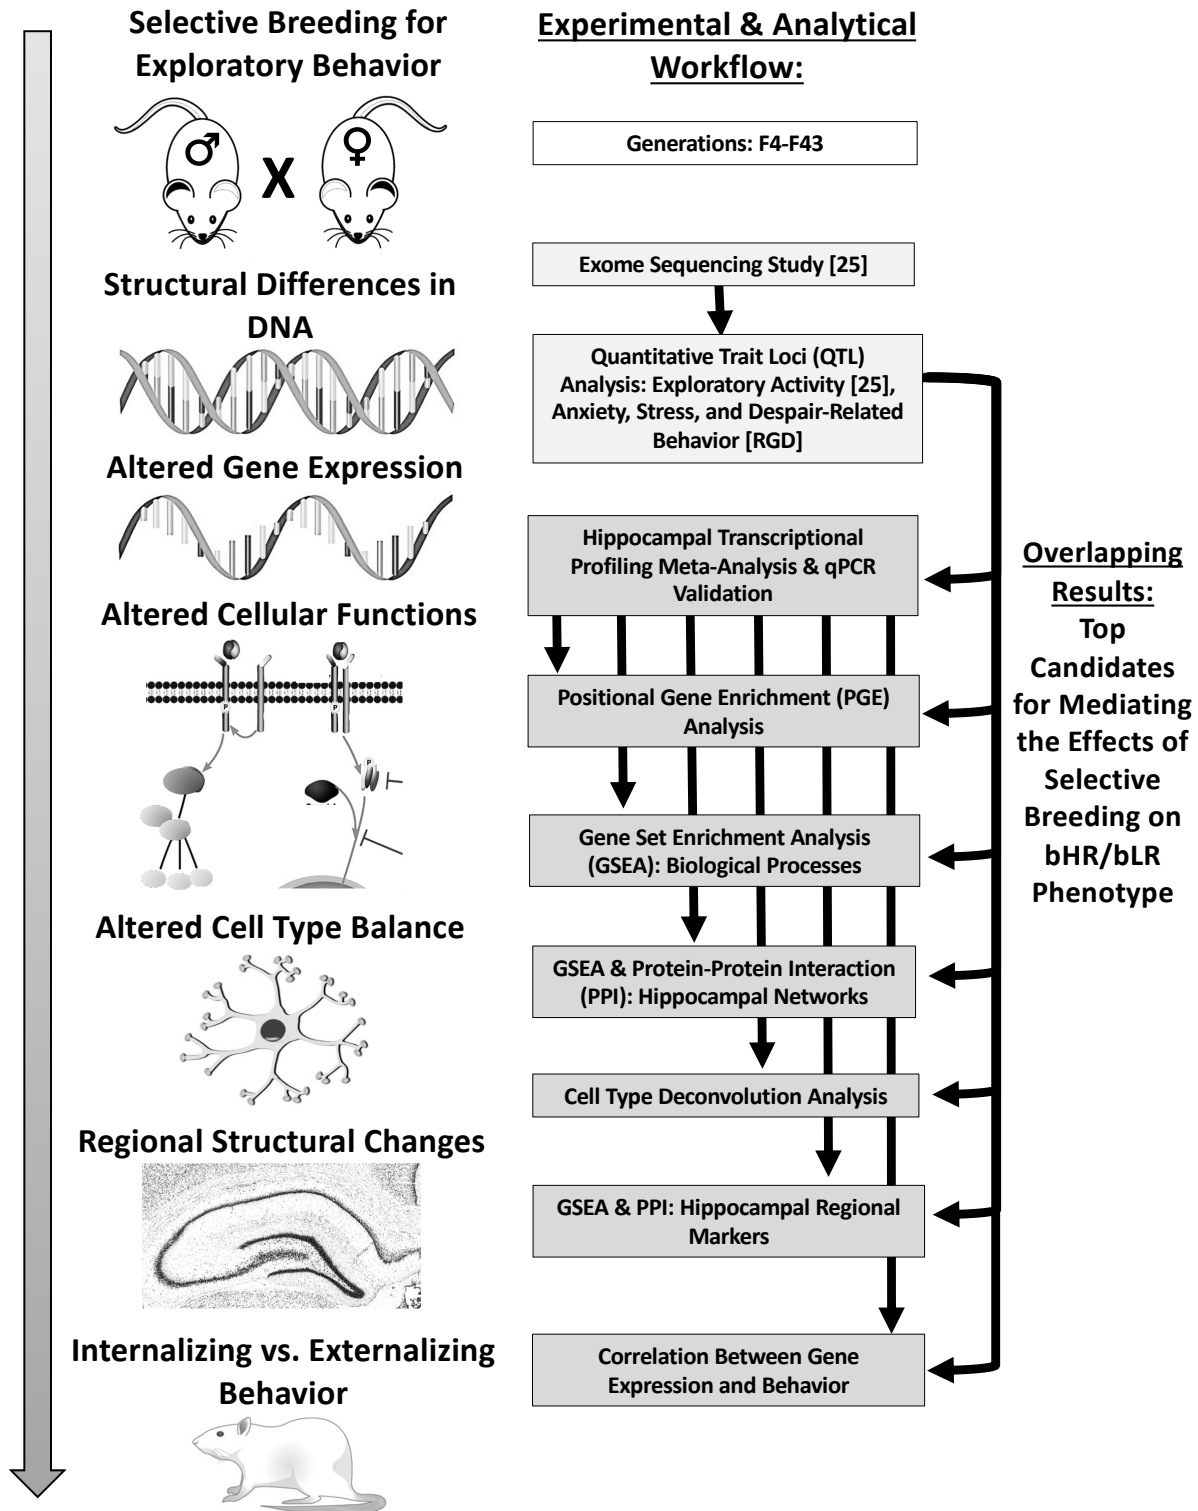

**Figure 1. An overview of the experimental and analytical workflow used to identify top candidate genes for mediating the effects of selective breeding on bHR/bLR phenotype.**

**Left:** Many generations of selective breeding based on exploratory locomotor behavior drove segregation of genetic variants that contribute to internalizing and externalizing behavior within our bHR and bLR rats. The effect of these variants on behavior is mediated by alterations in gene expression and cellular function, which produce local changes in cell type balance and structure within brain regions responsible for affective behavior, such as the hippocampus.

**Right:** Our concurrent genetic study used exome sequencing to identify genetic variants that segregated bHR/bLR rats in our colony, and then used a sampling of those variants to locate regions of the genome (quantitative trait loci – QTLs) that might contribute to exploratory locomotor activity (25). Our current study used meta-analyses of hippocampal transcriptional profiling studies to identify bHR/bLR differentially-expressed (DE) genes, pathways, cell types, and networks in development and adulthood. In our results, we emphasize DE genes that were 1) consistently DE across multiple developmental stages, 2) central to DE pathways, cell types, and networks, 3) located near genetic variants that segregated bHR/bLR rats in our colony and/or within QTLs for exploratory locomotion. These genes are the top candidates for mediating the effects of selective breeding on bHR/bLR phenotype.

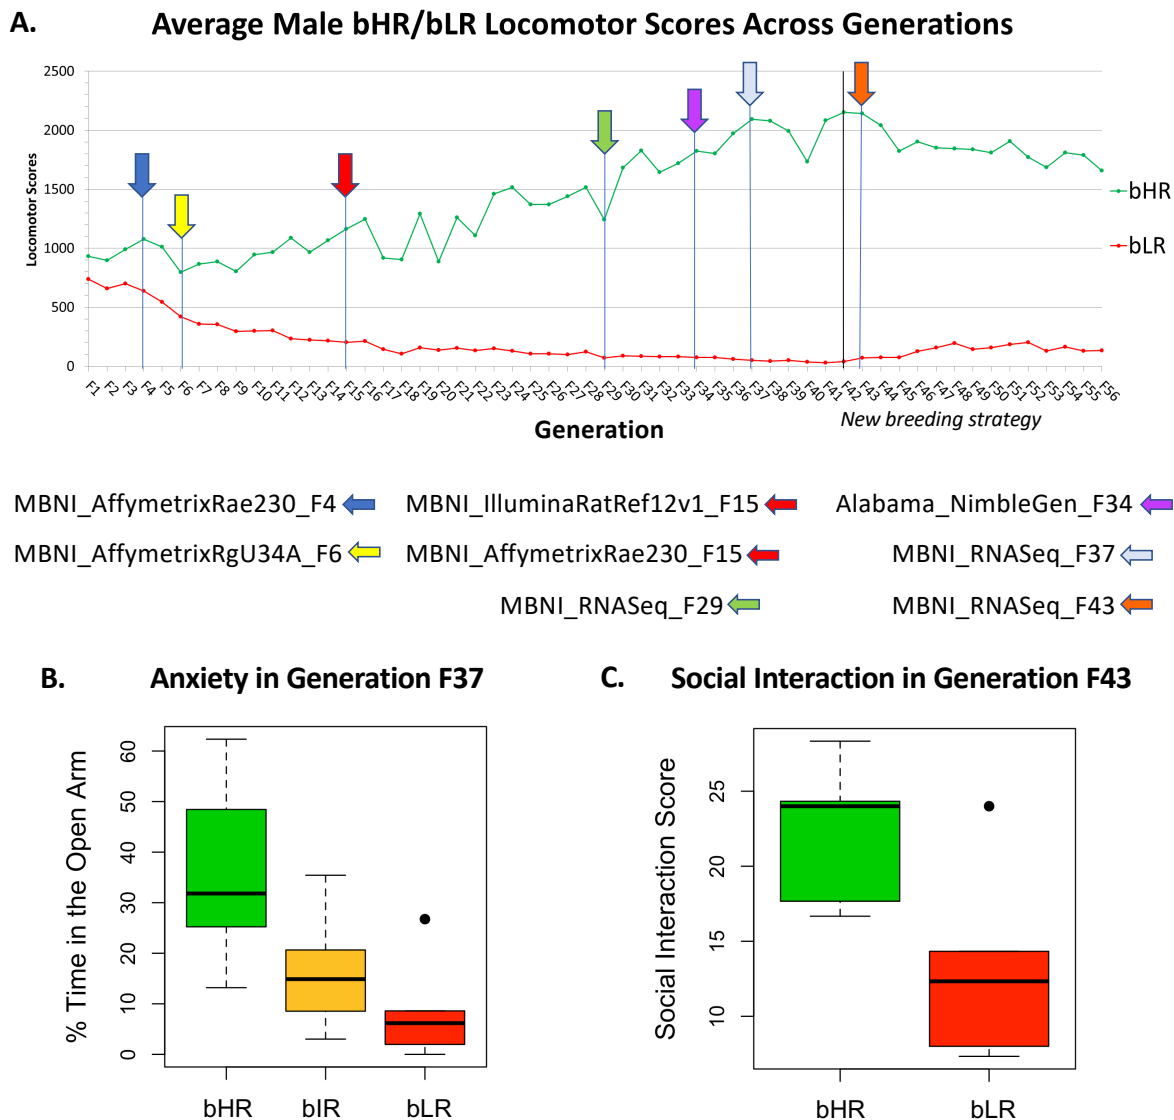

**Figure 2. Selectively-bred high responder (bHR) and low responder (bLR) rats model an extreme propensity for internalizing vs. externalizing behavior. A)** Over the course of 56 generations of selective breeding (F1-F56), the bHR rats (green) have developed increasingly elevated exploratory activity in a novel field (*y-axis*: average total locomotor score), whereas the bLR rats (red) have become less exploratory. These trends plateaued after F42, when our breeding strategy changed to deaccelerate divergence. Arrows indicate the generations during which hippocampal transcriptomic profiling datasets were collected, along with a name indicating the respective laboratory, platform, and generation for each dataset. **B)** bLR rats have

Running Head: bHR/bLR Hippocampal Gene Expression Meta-Analysis

been highly anxious since the initiation of our breeding colony. The example above is from the behavioral data accompanying the MBNI\_RNASeq\_F37 transcriptomic dataset showing bLRs spending a smaller percentage of time in the anxiogenic open arms of the elevated plus maze than bHR rats (effect of phenotype:  $F(2,15)=6.72$ ,  $p=8.25E-03$ , boxes=first quartile, median, and third quartile, whiskers = range). **C)** bLR rats are more reactive to stressors. This example is from the behavioral data accompanying the MBNI\_RNASeq\_F43 transcriptomic dataset showing bLR rats spending a smaller percentage of time interacting socially following exposure to a single mild stressor ( $F(1,8)=5.86$ ,  $p=0.0418$ ).



Running Head: bHR/bLR Hippocampal Gene Expression Meta-Analysis

| Adult Meta-Analysis: Top Results (FDR<0.05) |             |          |          |          |               |      |             |          |          |          |               |
|---------------------------------------------|-------------|----------|----------|----------|---------------|------|-------------|----------|----------|----------|---------------|
| Rank                                        | Gene Symbol | P-value  | FDR      | Estimate | # of Datasets | Rank | Gene Symbol | P-value  | FDR      | Estimate | # of Datasets |
| 1                                           | Tmem144     | 3.04E-08 | 4.95E-04 | -3.57    | 3             | 38   | Trappc6a    | 6.16E-05 | 2.61E-02 | -2.06    | 3             |
| 2                                           | Asb15       | 4.05E-07 | 2.32E-03 | 2.82     | 3             | 39   | Cav1        | 6.47E-05 | 2.61E-02 | 1.37     | 5             |
| 3                                           | Kif15       | 4.27E-07 | 2.32E-03 | -2.21    | 4             | 40   | Robo3       | 6.54E-05 | 2.61E-02 | -2.00    | 3             |
| 4                                           | Pkhd1l1     | 6.13E-07 | 2.49E-03 | -3.17    | 3             | 41   | C1qa        | 6.57E-05 | 2.61E-02 | -1.40    | 5             |
| 5                                           | Car9        | 7.87E-07 | 2.56E-03 | 2.78     | 3             | 42   | Tubg1       | 6.88E-05 | 2.65E-02 | -1.40    | 5             |
| 6                                           | Klhl34      | 1.04E-06 | 2.81E-03 | -2.39    | 4             | 43   | Zfp952      | 7.17E-05 | 2.65E-02 | 2.12     | 2             |
| 7                                           | Mvb12b      | 2.03E-06 | 4.32E-03 | -2.95    | 2             | 44   | Slc9a3r1    | 7.31E-05 | 2.65E-02 | 1.32     | 5             |
| 8                                           | Amer2       | 2.12E-06 | 4.32E-03 | 2.10     | 3             | 45   | Egfem1      | 7.45E-05 | 2.65E-02 | -2.11    | 2             |
| 9                                           | Rpl17       | 2.86E-06 | 5.17E-03 | -2.16    | 4             | 46   | Epb41l4a    | 7.49E-05 | 2.65E-02 | -2.10    | 2             |
| 10                                          | Nudt4       | 4.27E-06 | 6.51E-03 | -1.58    | 5             | 47   | Trmt10a     | 8.18E-05 | 2.83E-02 | -1.75    | 3             |
| 11                                          | Pkib        | 4.40E-06 | 6.51E-03 | 1.70     | 5             | 48   | Oard1       | 8.81E-05 | 2.98E-02 | 1.65     | 3             |
| 12                                          | Fxyd7       | 5.22E-06 | 6.62E-03 | -1.74    | 4             | 49   | Selenop     | 1.00E-04 | 3.33E-02 | 2.21     | 2             |
| 13                                          | Scube2      | 5.29E-06 | 6.62E-03 | -2.68    | 2             | 50   | Ezr         | 1.17E-04 | 3.72E-02 | 1.27     | 5             |
| 14                                          | Ddx20       | 5.77E-06 | 6.62E-03 | -1.93    | 4             | 51   | Acox3       | 1.17E-04 | 3.72E-02 | 1.26     | 5             |
| 15                                          | R3hdm4      | 6.10E-06 | 6.62E-03 | -2.03    | 3             | 52   | Ints8       | 1.21E-04 | 3.74E-02 | 2.11     | 2             |
| 16                                          | Hmgn5b      | 7.33E-06 | 6.94E-03 | 2.60     | 2             | 53   | Pld4        | 1.22E-04 | 3.74E-02 | -1.45    | 4             |
| 17                                          | Slc39a12    | 7.35E-06 | 6.94E-03 | 2.62     | 3             | 54   | Ucp2        | 1.27E-04 | 3.83E-02 | 1.29     | 5             |
| 18                                          | Acss2       | 7.68E-06 | 6.94E-03 | -1.87    | 4             | 55   | Rbm3        | 1.29E-04 | 3.83E-02 | -1.52    | 4             |
| 19                                          | Rhpn2       | 8.16E-06 | 6.98E-03 | 2.33     | 3             | 56   | Ankdd1b     | 1.37E-04 | 3.93E-02 | -2.00    | 2             |
| 20                                          | Exosc7      | 9.65E-06 | 7.85E-03 | 1.80     | 4             | 57   | Aar2        | 1.38E-04 | 3.93E-02 | 2.02     | 2             |
| 21                                          | Rnls        | 1.04E-05 | 8.06E-03 | 1.92     | 3             | 58   | Fn3k        | 1.42E-04 | 3.97E-02 | -1.47    | 4             |
| 22                                          | Slc19a3     | 1.50E-05 | 1.11E-02 | -2.36    | 3             | 59   | Slc27a1     | 1.45E-04 | 4.01E-02 | 1.24     | 5             |
| 23                                          | Prss55      | 1.91E-05 | 1.35E-02 | -2.43    | 2             | 60   | Afmid       | 1.52E-04 | 4.11E-02 | 1.98     | 2             |
| 24                                          | Apln        | 2.07E-05 | 1.41E-02 | 1.48     | 5             | 61   | Slc4a11     | 1.54E-04 | 4.11E-02 | -1.78    | 3             |
| 25                                          | Mfge8       | 2.70E-05 | 1.73E-02 | 1.50     | 5             | 62   | Zfp110      | 1.64E-04 | 4.31E-02 | 1.24     | 5             |
| 26                                          | C2cd3       | 2.84E-05 | 1.73E-02 | 2.06     | 3             | 63   | Tek         | 1.70E-04 | 4.33E-02 | -1.79    | 3             |
| 27                                          | Dnaaf3      | 2.87E-05 | 1.73E-02 | -2.51    | 2             | 64   | Fmo5        | 1.70E-04 | 4.33E-02 | 1.42     | 4             |
| 28                                          | Etv4        | 3.30E-05 | 1.92E-02 | 2.02     | 3             | 65   | Blvra       | 1.74E-04 | 4.36E-02 | 1.52     | 4             |
| 29                                          | Tmem2       | 3.72E-05 | 1.99E-02 | -2.29    | 2             | 66   | Prdm5       | 2.03E-04 | 4.94E-02 | -1.76    | 3             |
| 30                                          | Tdg         | 3.84E-05 | 1.99E-02 | -1.38    | 5             | 67   | Samd5       | 2.09E-04 | 4.94E-02 | 1.95     | 3             |
| 31                                          | Mki67       | 4.03E-05 | 1.99E-02 | -2.01    | 3             | 68   | Ntn4        | 2.10E-04 | 4.94E-02 | 1.94     | 2             |
| 32                                          | Tnnt1       | 4.06E-05 | 1.99E-02 | -1.51    | 5             | 69   | Chd1l       | 2.11E-04 | 4.94E-02 | 1.45     | 4             |
| 33                                          | Zfp90       | 4.13E-05 | 1.99E-02 | -1.59    | 4             | 70   | Ccdc137     | 2.13E-04 | 4.94E-02 | 1.97     | 2             |
| 34                                          | LOC363337   | 4.16E-05 | 1.99E-02 | -2.82    | 2             | 71   | Trhr        | 2.16E-04 | 4.94E-02 | 1.19     | 5             |
| 35                                          | Uhrf1       | 4.95E-05 | 2.29E-02 | -1.67    | 3             | 72   | Zfp821      | 2.22E-04 | 4.98E-02 | -1.48    | 3             |
| 36                                          | Tuba8       | 5.06E-05 | 2.29E-02 | -1.44    | 4             | 73   | Myh6        | 2.23E-04 | 4.98E-02 | -1.25    | 5             |
| 37                                          | Rltpr       | 5.58E-05 | 2.45E-02 | -2.28    | 2             | 74   | Sp3         | 2.26E-04 | 4.98E-02 | 1.93     | 3             |

| P7: Top Result (FDR<0.05) |             |          |          |          |               | P14: Top Result (FDR<0.15) |             |          |          |          |               |
|---------------------------|-------------|----------|----------|----------|---------------|----------------------------|-------------|----------|----------|----------|---------------|
| Rank                      | Gene Symbol | P-value  | FDR      | Estimate | # of Datasets | Rank                       | Gene Symbol | P-value  | FDR      | Estimate | # of Datasets |
| 1                         | Ncan        | 1.38E-07 | 4.86E-04 | -4.16    | 2             | 1                          | Bmp4        | 9.40E-06 | 1.47E-01 | -1.49    | 5             |

**Figure 3. The top DE genes within the bHR/bLR hippocampal gene expression meta-analyses.** P-value=nominal p-value, FDR=false detection rate, Estimate=estimated effect size (i.e., the difference in expression between bHR and bLR rats in units of standard deviation,

Running Head: bHR/bLR Hippocampal Gene Expression Meta-Analysis

green/positive=higher expression in bHRs, red/negative= higher expression in bLRs), # of datasets=number of datasets included in the meta-analysis for that gene.

**A. Genetic Variant Near Ncan (<100 kb distant) Segregates bHR and bLR Rats**

Nearby SNP (in Nr2c2ap):  
16\_20887728 (Rnor5)

|     | GG | GA | AA |
|-----|----|----|----|
| bHR | 12 | 0  | 0  |
| bLR | 0  | 7  | 5  |

**B. Neurocan is particularly elevated in early development in bLR rats**

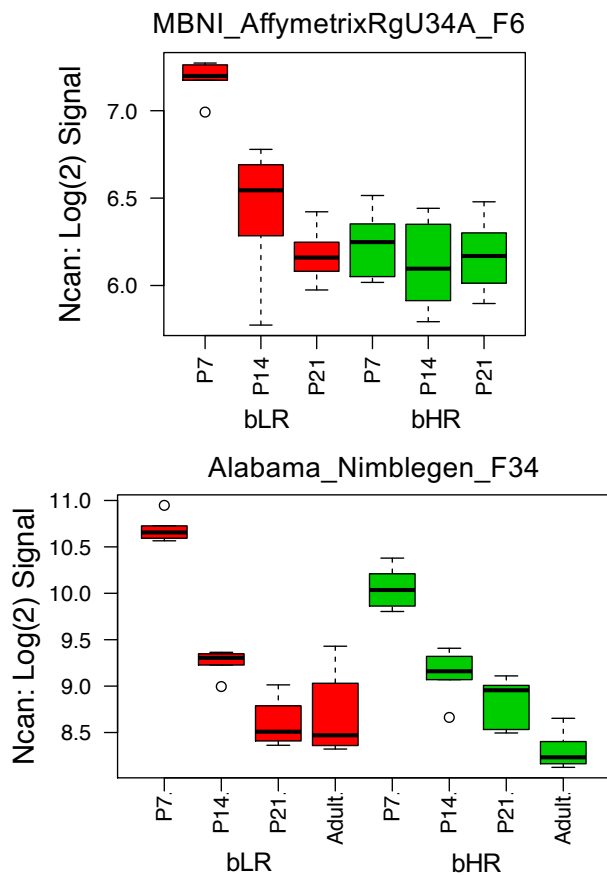

**C. Neurocan is more highly expressed in bLR rats at P7**

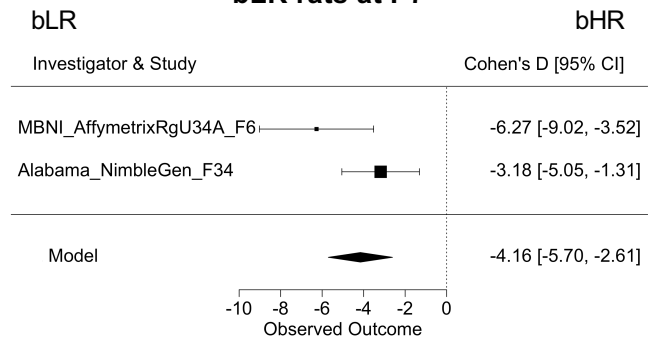

**D. Neurocan is more highly expressed in bLR rats at P14**

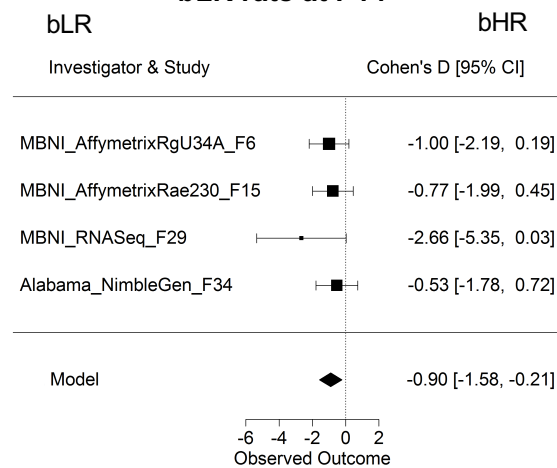

**Figure 4. The extracellular matrix constituent Neurocan (Ncan) has elevated expression in bLR rats at age P7. A)** A genetic variant on Chr 16 nearby Ncan (<100 kb) segregated bHR and bLR rats (Fisher's exact test:  $p=1.63E-07$ ). **B)** Boxplots illustrating the effect of age and bHR/bLR phenotype on Ncan expression (log(2) signal) in two microarray studies (boxes=median and interquartile range, whiskers=range, red=bLR, green=bHR). The effect of phenotype is most obvious at an age when Ncan is elevated in development (P7). **C-D)** Forest

Running Head: bHR/bLR Hippocampal Gene Expression Meta-Analysis

plots showing that Ncan was more expressed in bLRs than bHRs (boxes=Cohen's D from each study +/-95% confidence intervals, "Model"=estimated effect size +/-95% confidence intervals provided by the meta-analysis) **C**) in the P7 meta-analysis ( $\beta=-4.16$ ,  $p=1.38E-07$ ,  $FDR=4.86E-04$ ), **D**) and nominally in the P14 meta-analysis ( $\beta=-0.90$ ,  $p=1.01E-02$ ,  $FDR=7.24E-01$ ).

**A. The Top Result at P14: Bmp4 is More Highly Expressed in bLRs**

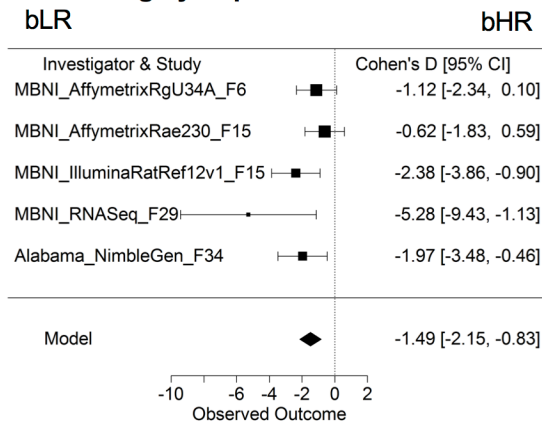

**B. Bmp4 Remains More Highly Expressed in bLRs in Adulthood**

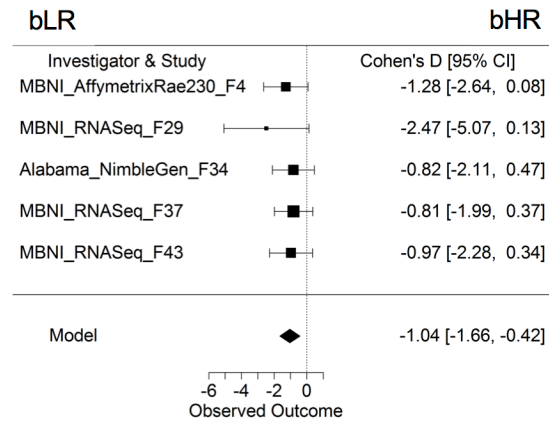

**C. qPCR Validation: Bmp4 is More Highly Expressed in bLRs at P14 and Adulthood**

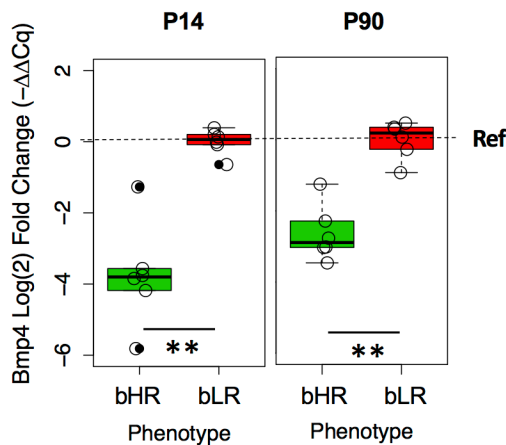

**D. Bmp4 Correlates with Anxiety in Adulthood**

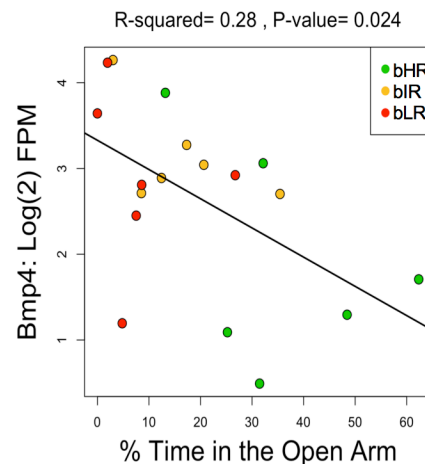

**Figure 5. A regulator of proliferation and differentiation, Bone morphogenetic protein 4 (Bmp4), is more highly expressed in bLR rats than bHR rats at P14 and adulthood. A-B)**

Two forest plots showing that Bmp4 was consistently elevated in bLR rats (boxes=Cohen's D from each study +/-95% confidence intervals, "Model"=estimated effect size +/-95% confidence intervals provided by the meta-analysis) at **A)** P14 ( $\beta=-1.49$ ,  $p=9.40E-06$ ,  $FDR=1.47E-01$ ) and **B)** adulthood (adult:  $\beta=-1.04$ ,  $p=1.01E-03$ ,  $FDR=9.38E-02$ ). This direction of effect mirrors findings in the literature that show that blocking the expression of Bmp4 in mice reduces anxiety

and depressive-like behavior (98). **C)** Using qPCR, we confirmed that bLRs showed greater *Bmp4* expression than bHRs at P14 and adulthood (P90) using hippocampal tissue from later generations (F51, F55). Log(2) fold change in *Bmp4* expression was calculated using the Livak method ( $-\Delta\Delta Cq$ , (43)), using *Gapdh* as the reference housekeeping gene and bLRs as the reference group (therefore the bLR mean is set to 0 in all panels).  $**p < 0.005$  (Data release: doi: 10.6084/m9.figshare.10321658; P14:  $Log(2)FC = -3.74$ ,  $T(5.60) = -6.10$ ,  $p = 0.00115$ ; P90:  $T(8.74) = -6.87$ ,  $p = 8.44E-05$ ). **D)** Within the behavioral data accompanying the MBNI\_RNASeq\_F37 dataset, we found that *Bmp4* showed a negative relationship with percent time in the open arms ( $\beta = -0.034$ ,  $R^2 = 0.28$ ,  $p = 0.024$ ) and a positive relationship with the number of fecal boli produced on the EPM ( $\beta = 0.32$ ,  $R^2 = 0.29$ ,  $p = 0.020$ , *data not shown*).

Running Head: bHR/bLR Hippocampal Gene Expression Meta-Analysis

**A. bHR/bLR Differentially-Expressed Genes Are Often Located Close to Genetic Variants (SNPs) that Segregate bHR and bLR Rats**

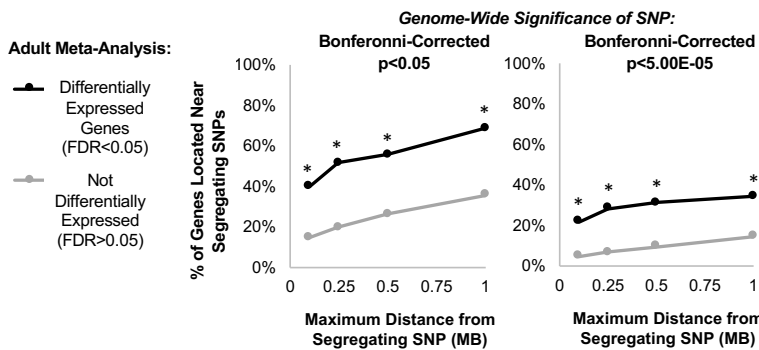

**B. bHR/bLR Differentially-Expressed Genes Often Overlap QTLs for Exploratory Locomotion**

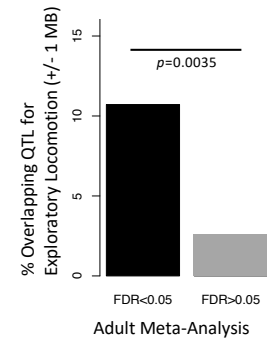

**C. Differentially-Expressed Genes within QTLs for Exploratory Locomotion:**

| QTLs from bHR/bLR F2 Intercross: Exploratory Locomotion |                                  |      | Overlapping QTLs from Rat Genome Database |           |                 |                    |
|---------------------------------------------------------|----------------------------------|------|-------------------------------------------|-----------|-----------------|--------------------|
| Chr                                                     | QTL range in MB* (LOD>3, +/-1MB) | LOD  | Genes w/ FDR<0.1 in Meta-Analysis         | Anxiety   | Stress Response | Behavioral Despair |
| 1                                                       | 28-31                            | 3.13 |                                           |           | [53]            | [56]               |
| 1                                                       | 39-65                            | 4.75 | <i>Ezr</i>                                | [47]      | [53]            |                    |
| 1                                                       | 98-104                           | 3.42 | <i>Dbp</i>                                | [47],[48] | [53]            |                    |
| 1                                                       | 115-132                          | 7.76 | <i>Hmgn5b</i>                             | [47],[48] | [53],[54]       |                    |
| 1                                                       | 139-142                          | 3.14 | <i>Mfge8</i>                              | [47],[48] | [54]            |                    |
| 1                                                       | 156-171                          | 4.32 | <i>Olr35, Spcs2, C2cd3, Ucp2</i>          | [47],[48] | [54]            |                    |
| 2                                                       | 43-70                            | 4.26 | <i>Pdzd2, Selenop</i>                     | [49]      | [55]            |                    |
| 2                                                       | 92-95                            | 3.02 |                                           |           | [55], [55]      |                    |
| 3                                                       | 43-65                            | 4.71 | <i>Ttc30a1</i>                            | [49]      | [53]            | [56]               |
| 5                                                       | 98-102                           | 3.34 |                                           | [51],[52] |                 |                    |
| 7                                                       | 67-85                            | 5.14 | <i>Trhr, Pkhd11</i>                       | [49]      | [53]            |                    |
| 17                                                      | 157-177                          | 3.82 | <i>Chrm3, Akrl1</i>                       |           |                 |                    |
| 18                                                      | 71-81                            | 4.99 |                                           | [50]      |                 |                    |

**D. Top Genomic Regions Enriched with Differentially Expressed Genes:**

| Genetic Loci Enriched with bHR/bLR Differentially Expressed Genes (PGE) |                     |          |          |                     |                  |                                                                 | Overlapping QTLs:      |            |                 |                    |
|-------------------------------------------------------------------------|---------------------|----------|----------|---------------------|------------------|-----------------------------------------------------------------|------------------------|------------|-----------------|--------------------|
| Chr                                                                     | Location (Rnor_6.0) | P-value  | FDR      | Size of Region (kb) | Enrichment Score | Genes w/ FDR<0.1 in Meta-Analysis                               | Exploratory Locomotion | Anxiety    | Stress Response | Behavioral Despair |
| 1                                                                       | 2782900-4653300     | 7.76E-04 | 1.02E-02 | 1,870               | 0.6              | <i>Samd5</i>                                                    |                        |            |                 | [56]               |
| 1                                                                       | 164225800-165684000 | 4.97E-05 | 4.68E-03 | 1,458               | 0.2              | <i>Olr35, Spcs2, C2cd3, Ucp2</i>                                | [25]                   | [47], [48] | [54]            |                    |
| 1                                                                       | 174385400-174620200 | 1.77E-04 | 5.69E-03 | 235                 | 1                | <i>Scube2</i>                                                   |                        | [48]       | [63]            |                    |
| 3                                                                       | 62800900-63455200   | 7.76E-04 | 1.02E-02 | 654                 | 0.6              | <i>Ttc30a1</i>                                                  | [25]                   | [49]       | [53]            | [56]               |
| 3                                                                       | 119361600-119677400 | 1.22E-04 | 5.69E-03 | 316                 | 0.6              | <i>Blvra</i>                                                    |                        |            | [53],[55]       | [56]               |
| 3                                                                       | 151032900-151150600 | 1.77E-04 | 5.69E-03 | 118                 | 1                | <i>Acss2, Myh7b</i>                                             |                        |            | [55]            |                    |
| 3                                                                       | 176280000-176526000 | 4.08E-04 | 7.97E-03 | 246                 | 0.8              |                                                                 |                        |            |                 |                    |
| 5                                                                       | 155246400-155264100 | 1.77E-04 | 5.69E-03 | 18                  | 1                | <i>C1qa, C1qc</i>                                               |                        | [49]       |                 |                    |
| 7                                                                       | 81919900-83358500   | 2.02E-04 | 6.05E-03 | 1,439               | 0.5              | <i>Trhr</i>                                                     | [25]                   | [49]       | [53]            |                    |
| 10                                                                      | 88392200-103730100  | 6.80E-05 | 4.68E-03 | 15,338              | 0.1              | <i>Slc9a3r1, Sox9, Tubg1, Ghdc, Tmem101, Acbd4, Ddx42, Etv4</i> |                        | [50]       | [64], [65]      |                    |
| 12                                                                      | 37444100-39302600   | 4.30E-06 | 2.96E-03 | 1,859               | 0.3              | <i>Eif2b1</i>                                                   |                        |            |                 |                    |
| 16                                                                      | 81035000-81209500   | 3.35E-05 | 4.68E-03 | 175                 | 0.8              |                                                                 |                        |            | [55]            |                    |
| 19                                                                      | 32182900-42110300   | 2.85E-05 | 4.68E-03 | 9,927               | 0.1              | <i>Zfp90</i>                                                    |                        |            |                 |                    |

**Figure 6. Many of the top differentially expressed genes are located near genetic variants that segregate bHR/bLR rats within quantitative trait loci (QTLs) for exploratory locomotor activity. A.** Our concurrent genetic study used exome sequencing to identify variants (SNPs) that segregated bHR/bLR rats in our colony (25). A high percentage of bHR/bLR differentially-expressed genes (adult meta-analysis:  $FDR < 0.05$ ) were found within +/- 100 kb, 250 kb, 500 kb, or 1 MB of these segregating variants, using either traditional (Bonferonni-corrected  $p < 0.05$ ) or more stringent (Bonferonni-corrected  $p < 5.00E-5$ ) criteria to define segregation. Asterisks (\*) designate enrichment (Fisher's exact test  $p < 0.0001$ ) in comparison to the non-differentially expressed genes in our meta-analysis ( $FDR > 0.05$ ). **B.** Our concurrent genetic study used a sampling of bHR/bLR segregating variants to identify QTLs for exploratory locomotor activity in a novel field using an bHR/bLR F2 intercross (25). bHR/bLR differentially-expressed genes (adult meta-analysis:  $FDR < 0.05$ ) were 4.5x more likely to overlap (+/- 1MB) QTLs for exploratory locomotion than other genes included in our meta-analysis (Fisher's exact test:  $p = 0.0035$ ). **C.** A table illustrating the top genes from our meta-analyses ( $FDR < 0.1$ , bold+italic= $FDR < 0.05$ ) that overlap (+/-1 MB) significant (LOD>4) and putative (LOD>3) QTLs for exploratory locomotion identified by our concurrent genetic study (25). Also depicted is overlap with QTLs identified in the Rat Genome Database (32) for the following behaviors relevant to the bHR/bLR phenotype: anxiety (47–52), stress-related responses (53–55), and behavioral despair (56). **D.** The top chromosomal loci enriched for bHR/bLR DE genes overlap previously-identified QTLs relevant to externalizing and internalizing behaviors. The top chromosomal loci enriched for bHR/bLR DE genes were identified using Positional Gene Enrichment analysis (PGE): location (full coordinates), p-value=nominal p-value,  $FDR$ =false detection rate, enrichment score= ratio of genes with  $p < 0.01$  out of all genes in the region. Also depicted is the overlap (+/-1 MB) of these enriched chromosomal loci with QTLs for exploratory locomotor activity (25), as well as with QTLs identified in the Rat Genome Database (32) for anxiety (47–50), stress-related responses (53–55,63–65), and behavioral despair (56).



Running Head: bHR/bLR Hippocampal Gene Expression Meta-Analysis

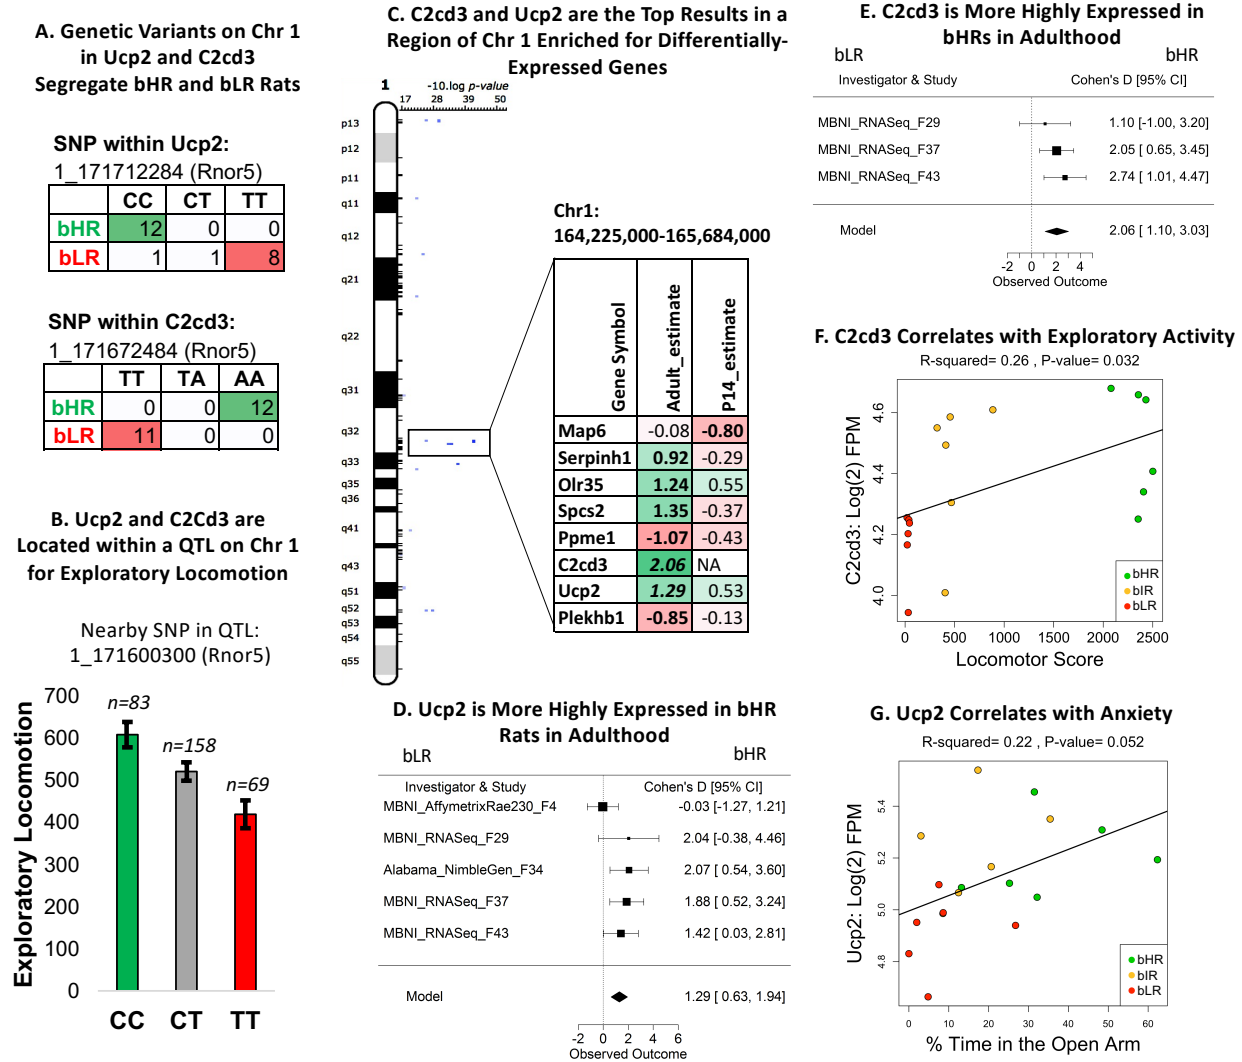

**Figure 7. A region on chromosome 1 implicated in bHR/bLR phenotype contains two genes important for brain function and development, Uncoupling Protein 2 (Ucp2) and C2 Calcium Dependent Domain Containing 3 (C2cd3). A)** Genetic variants on Chr 1 within Ucp2 and C2cd3 segregate bHR and bLR rats in our colony (Rnor5 coordinates, Fisher's exact test: SNP 1\_171712284:  $p=1.66E-09$ ; SNP 1\_171672484:  $p=1.27E-13$ ). **B)** Ucp2 and C2cd3 are located on Chr 1 within a QTL for exploratory locomotor activity. An example of the correlation between genetic variation in this region and behavior is illustrated using the sequencing results

Running Head: bHR/bLR Hippocampal Gene Expression Meta-Analysis

from a nearby SNP and exploratory locomotor activity measured in a bHRxbLR F2 intercross ( $n=310$ ;  $adj.R^2=0.049$ ,  $p=2.00E-04$ ,  $FDR=0.0048$ ). **C)** C2cd3 and Ucp2 were the top DE genes ( $FDR<0.05$ ) within a segment of Chr 1 enriched for DE genes and containing a QTL for exploratory locomotor activity (25). The table illustrates the DE genes within this region: estimate=estimated effect size (green/positive=higher expression in bHRs), bold= $p<0.05$ , bold+italic= $FDR<0.05$ . **D)** A forest plot showing that Ucp2 had higher expression in bHRs in four out of the five adult datasets included in the adult meta-analysis (boxes=Cohen's D from each study +/-95% confidence intervals, "Model"=estimated effect size +/-95% confidence intervals provided by the meta-analysis, effect of phenotype:  $\beta=1.29$ ,  $p=1.27E-04$ ,  $FDR=3.83E-02$ ). This direction of effect mirrors findings in the literature showing that Ucp2 knockout mice have higher anxiety-like behavior and lower locomotor activity, as well as greater sensitivity to stress (57,58,60,61), much like our bLR rats. **E)** A forest plot showing that C2cd3 had higher expression in bHRs in three adult datasets included in the adult meta-analysis (effect of phenotype:  $\beta=2.06$ ,  $p=2.84E-05$ ,  $FDR=1.73E-02$ ). **F)** In the behavioral data accompanying the MBNI\_RNASeq\_F37 dataset, C2cd3 (units: log(2) fragments per million (FPM)) showed a positive relationship with exploratory locomotor activity ( $\beta=0.000109$ ,  $R^2=0.26$ ,  $p=3.20E-02$ ). **G)** In the behavioral data accompanying the MBNI\_RNASeq\_F37 dataset, Ucp2 showed a trend towards a positive relationship with percent of time spent in the anxiogenic open arms of the EPM ( $\beta=0.03$ ,  $R^2=0.22$ ,  $p=5.16E-02$ ).

Running Head: bHR/bLR Hippocampal Gene Expression Meta-Analysis

**A. Genetic Variant Near Trhr (<200 kb distant) Segregates bHR and bLR Rats**

Nearby SNP (in Nudcd1):

7\_83331058 (Rnor5)

|     | CC | CT | TT |
|-----|----|----|----|
| bHR | 0  | 0  | 12 |
| bLR | 12 | 0  | 0  |

**B. Trhr is Located within a QTL on Chr 7 for Exploratory Locomotor Activity**

Nearby SNP in QTL:  
7\_83331058 (Rnor5)

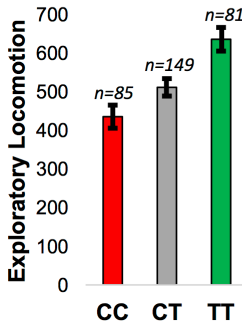

**C. Trhr is More Highly Expressed in bHR Rats in Adulthood**

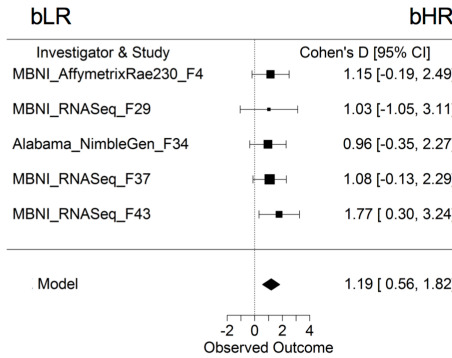

**F. Trhr Correlates with Exploratory Activity**

R-squared= 0.22 , P-value= 0.051

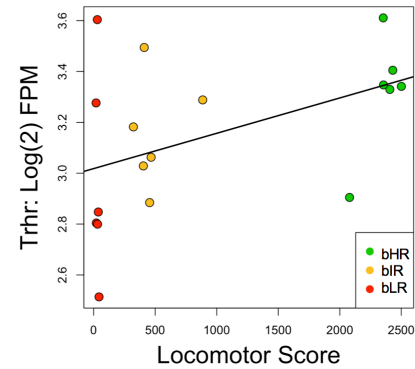

**D. Trhr is the Top Result in a Section of Chr 7 Enriched for Differentially-Expressed Genes**

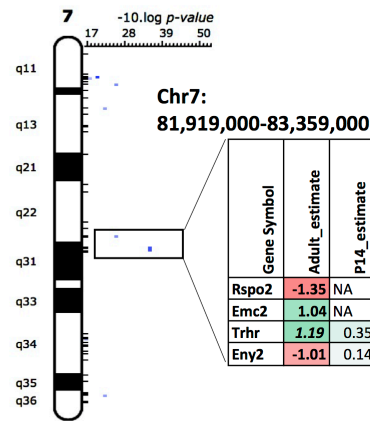

**G. Trhr is the Top Result Within a Hippocampal Co-expression Network Enriched for Differentially-Expressed Genes**

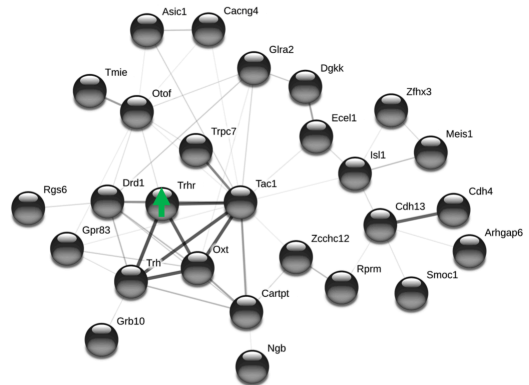

**E. Trhr is a Top Result in Two Hippocampal-Specific Gene Sets Enriched with bHR/bLR Differential Expression**

| Top Co-expression Networks in Adults (FDR<0.10): | Adult NES | P14 NES | Leading Edge Genes in Adults (Bold = FDR<0.10 in meta-analysis):              |
|--------------------------------------------------|-----------|---------|-------------------------------------------------------------------------------|
| From mouse: "paleturquoise"                      | 1.94      | -1.08   | <b>ADAMTS2</b> ,FOXC1,FBLN1,MRC1,OMD,ANGPT2,EMP3,BGN,CD248,HSPB1              |
| From human: "M11"                                | -1.72     | -1.84   | <b>FBXO31</b> ,NPHP4,PPME1,ARHGAP39,FAM131B,PLXNA1,NCOR2,PPFIA4,DMTN,STRN4    |
| From mouse: "darkred"                            | -1.68     | 0.98    | MTF2,DUSP11,SNHG11,DDX26B,LRRC29,RYR3,NFKBIZ,EML5,TCF25,NRXN3                 |
| From human: "M24"                                | 1.54      | -0.97   | <b>EZR</b> ,ITSN1,LDNK,PPAP2B,FAM167A,GFPT2, <b>ITGB4</b> ,PSD2,PITPNC1,PHGDH |
| From mouse: "sienna3"                            | 1.91      | -0.64   | OTOF, <b>TRHR</b> ,SMOC1,ZBTB7C,GLRA2,GRB10,MEIS1,GPR83,ARHGAP6               |
| From mouse: "lightcyan"                          | -1.27     | -1.47   | <b>RLTPR</b> ,ATMIN,KAT2A,JPH3,ACAD8,REV1,USE1,B9D2,RAB3D,PWWP2B              |

| Top Co-expression Networks at P14 (FDR<0.10): | Adult NES | P14 NES | Leading Edge Genes at P14 (Bold = FDR<0.10 in meta-analysis):         |
|-----------------------------------------------|-----------|---------|-----------------------------------------------------------------------|
| From mouse: "lightyellow"                     | -1.13     | -1.56   | ZFP277,ACTA2,DMWD,SEMA7A,UQCRC1,CNNM3,ATM,NPAS2,NCAN,BRD4             |
| From human: "M11"                             | -1.72     | -1.84   | DTX3,FBXO31,GFOD1,HYOU1,ADCY9,LRFN4,DYRK1B,PTMS,UBA1,WBSCR17          |
| From mouse: "lightcyan"                       | -1.27     | -1.47   | H1FX,ELFN2,ZCRB1,APBA2,SLC2A13,POLK,SNUPN,ATG5,HYOU1,SNAPIN           |
| From human: "M1"                              | NA        | -1.36   | EID2,CHST15,RIMBP2,EMX1,NT5C3B,ELFN2,FAM65A,SRSF7,ZDHHC22,APBA2       |
| From mouse: "skyblue"                         | 0.86      | -1.84   | TSC22D4,MOBP,ADSSL1,SLC35B2,OPALIN,MAG,EFHD1,GJC2,ITGB4               |
| From human: "M7"                              | -1.45     | -1.70   | ARHGEF4,ST6GALNAC6,DHRS11,AGAP3,B3GAT1,ARHGEF25,LRP3,PLSCR3,LMO4,NCS1 |

| Top Regional Markers in Adults (FDR<0.10): | Adult NES | P14 NES | Leading Edge Genes in Adults (Bold = FDR<0.10 in meta-analysis): |
|--------------------------------------------|-----------|---------|------------------------------------------------------------------|
| "dg_v VS dg_d"                             | 2.05      | 0.88    | <b>TRHR</b> ,TOX3,PDZRN3,FBLN1,TSHZ1,STK32B,ZFP423,NCAPG,LCORL   |

| Top Regional Markers at P14 (FDR<0.10):        | Adult NES | P14 NES | Leading Edge Genes at P14 (Bold = FDR<0.10 in meta-analysis): |
|------------------------------------------------|-----------|---------|---------------------------------------------------------------|
| "dg_d-dg_v VS ca4-ca3_d-ca3_v-ca2-ca1_d-ca1_v" | -0.88     | -1.76   | SCN3A,ARHGAP20,MARCKS,SV2C,PDE7B,TRPC6,SLC4A4,BTG2,IGFBP5,RF3 |

**Figure 8. Thyrotropin releasing hormone receptor (Trhr) was the top gene within two hippocampal specific gene sets and within a region of Chromosome 7 implicated in bHR/bLR phenotype. A)** A genetic variant on Chr 7 near *Trhr* (<200 kb distant) segregates bHR and bLR rats in our colony (Fisher's exact test:  $p=6.20E-14$ ). **B)** *Trhr* is located on Chr 7 within a QTL for exploratory locomotor activity. An example of the correlation between genetic variation in this region and behavior is illustrated using the sequencing results from a SNP nearby *Trhr* (discussed above) and exploratory locomotor activity measured in a bHRxbLR F2 intercross ( $n=315$ ,  $adj.R^2=0.061$ ,  $p=5.79E-05$ ,  $FDR=0.00178$ ). **C)** A forest plot showing that *Trhr* expression was consistently elevated in bHR rats since generation F4 (boxes=Cohen's D from each study +/-95% confidence intervals, "Model"=estimated effect size +/-95% confidence intervals provided by the meta-analysis,  $\beta=1.19$ ,  $p=2.16E-04$ ,  $FDR=4.94E-02$ ). This direction of effect mirrors findings in the literature that show *Trhr*-KO mice exhibit greater anxiety and depressive-like behavior (62). **D)** *Trhr* was the strongest result within a segment of Chromosome 7 enriched for DE genes and overlapping a QTL for exploratory locomotor activity. The table illustrates the DE genes within this region: estimate=estimated effect size (green/positive=greater expression in bHRs), bold= $p<0.05$ , bold+italic= $FDR<0.05$ . **E)** *Trhr* was a leading gene in two of the top hippocampal-specific gene sets identified as enriched for bHR/bLR DE genes by GSEA (FDR: False Detection Rate; NES: Normalized Enrichment Score, with positive scores (green) indicating greater expression in bHRs and negative scores (red) indicating greater expression in bLRs, bold:  $p<0.05$  in GSEA results, bold+italics:  $FDR<0.05$  in GSEA results). The top 10 "Leading Edge" genes for each gene set are shown (bold+italics:  $FDR<0.05$  in meta-analysis). These genes have large estimated effect sizes within the meta-analysis and help drive the enrichment of effects within these gene sets. Regional marker gene sets use the following abbreviations: "dg"=dentate gyrus, "v"=ventral, "d"=dorsal, "ca"=Cornu Ammonis subregion. **F)** In the behavioral data accompanying the MBNI\_RNASeq\_F37 dataset, *Trhr* (units: log(2) fragments per million (FPM)) showed a trend towards a positive relationship

Running Head: bHR/bLR Hippocampal Gene Expression Meta-Analysis

with exploratory locomotor activity ( $\beta=4.48E-04$ ,  $R^2= 0.22$ ,  $p=5.08E-02$ ). **G**) *Trhr* and its ligand, Thyrotropin releasing hormone (*Trh*), are hub genes within a hippocampal specific co-expression network that is enriched for bHR-upregulated genes. Genes within this network with known protein-protein interactions are illustrated above (STRINGdb: confidence setting=0.15 due to hippocampal co-expression already suggesting potential interaction). Many of these genes have documented associations with reward behavior.

**A. Top Results Are Enriched with Genes Related to Cell Proliferation, Differentiation, and Development**

| Top Pathways in Adults (FDR<0.10):           | Adult NES   P14 NES | Leading Edge Genes in Adults (Bold = FDR<0.10 in meta-analysis):   |
|----------------------------------------------|---------------------|--------------------------------------------------------------------|
| protein_folding(6)                           | 2.32                | 1.24 FBXP4,HSPA8,CCT4,CHORDC1,PDIA6,HSP90AA1,CLU,DNAIC10,TCF1      |
| positive_regulation_of_cell_proliferation(4) | 1.59                | -1.30 SOX9,MFGE8,APLN,GPR183,CAV1,CD24,HESS,HTRA1,GLUL,LEP         |
| nephron_development(4)                       | 2.08                | -0.94 SOX9,CD24,FOXO1,PTPRO,ANGPT2,SERPINF7,WNK4,SOX8,HLX1,TACSTD2 |
| chaperone_mediates_protein_folding(7)        | 2.17                | 1.32 FBXP4,HSPA8,CCT4,CHORDC1,CLU,PDIA4,CANX,PPID,STI3,HSPD1       |

  

| Top Pathways at P14 (FDR<0.05):                                       | Adult NES   P14 NES | Leading Edge Genes at P14 (Bold = FDR<0.10 in meta-analysis):     |
|-----------------------------------------------------------------------|---------------------|-------------------------------------------------------------------|
| generation_of_neurons(7)                                              | 0.94                | -1.56 FARP1,BMP4,BEX1,SOX9,ANKRD27,SHC1,SNX3,TNC,FBXO31,TCF12     |
| negative_regulation_of_multicellular_organismal_process(3)            | 1.11                | -1.62 BMP4,BEX1,SOX9,LRP1,XYLT1,SRGAP2,SERPINF1,NPF,GNM1P5,HDAC7  |
| neurogenesis(6)                                                       | 0.98                | -1.51 FARP1,BMP4,BEX1,SOX9,ANKRD27,SHC1,SNX3,TNC,FBXO31,TCF12     |
| regulation_of_neurogenesis(6)                                         | 0.78                | -1.60 BMP4,BEX1,SOX9,SNX3,FBXO31,TCF12,LRP1,XYLT1,SRGAP2,SERPINF1 |
| neuron_differentiation(6)                                             | 0.86                | -1.56 FARP1,BMP4,BEX1,SOX9,ANKRD27,SHC1,SNX3,TNC,FBXO31,TCF12     |
| negative_regulation_of_cellular_macromolecule_biosynthetic_process(6) | 0.92                | BMP4,SOX9,LUXT,CHD8,YBX1,GFPT1,RARA,ZEB1,HDAC7,KHDRBS1            |
| regulation_of_neuron_differentiation(7)                               | -0.70               | -1.59 BMP4,BEX1,SOX9,SNX3,FBXO31,TCF12,LRP1,XYLT1,SERPINF1,RARA   |
| regulation_of_nervous_system_development(5)                           | 0.83                | -1.57 BMP4,BEX1,SOX9,SNX3,FBXO31,TCF12,LRP1,XYLT1,SRGAP2,SERPINF1 |

**C. Genetic Variants in Marker of Proliferation Ki-67 Segregate bHRs & bLRs**

**SNP within Mki67:**

1\_214939984 (Rnor5)

|     |    |    |
|-----|----|----|
| AA  | AG | GG |
| bHR | 12 | 0  |
| bLR | 0  | 2  |

**SNP within Mki67:**

1\_214940284 (Rnor5)

|     |    |    |
|-----|----|----|
| CC  | CT | TT |
| bHR | 12 | 0  |
| bLR | 0  | 2  |

**D. Mki-67 is More Highly Expressed in bLRs in Adulthood**

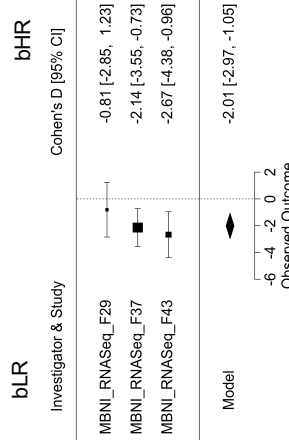

**E. Mki-67 Correlates with Exploratory Activity**

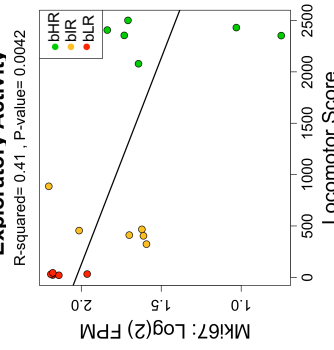

**B. An Unbiased PPI-Network Constructed from the Top Results Highlights Genes Involved in Cell Proliferation and Differentiation**

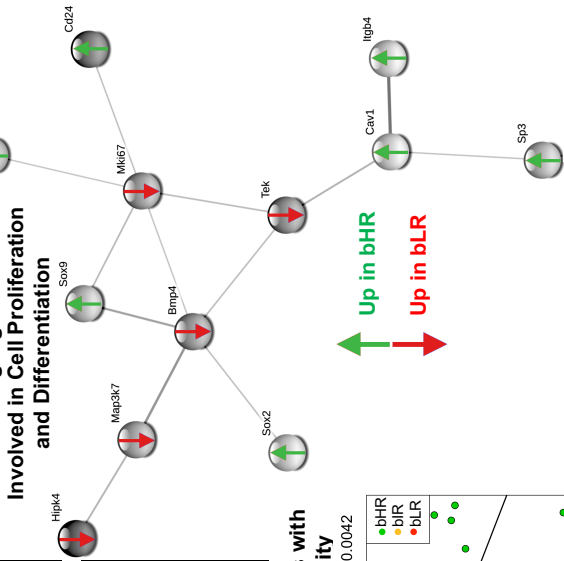

**Figure 9. The top bHR vs. bLR DE results are enriched with genes related to cell proliferation, differentiation, and development, including the canonical Marker of**

**Proliferation (Mki67).** **A)** A table of the top functional ontology gene sets identified as enriched for bHR/bLR DE genes by GSEA (FDR: False Detection Rate; NES: Normalized Enrichment Score, with positive scores (green) indicating higher expression in bHRs and negative scores (red) indicating higher expression in bLRs, bold:  $p < 0.05$  in GSEA results, bold+italics:  $FDR < 0.05$  in GSEA results). The top 10 “Leading Edge” genes for each gene set are shown (bold+italics:  $FDR < 0.05$  in meta-analysis). These genes have large estimated effect sizes within the meta-analysis and help drive the enrichment of effects within these gene sets. **B)** A PPI network constructed using the top genes from the adult meta-analysis (192 genes with  $FDR < 0.10$ , STRINGdb: confidence setting=0.40) had a dominant subnetwork that included Bmp4 and Mki67 as hub genes. Many of these genes are related to cell proliferation and differentiation within the brain. **C)** Two genetic variants on Chr 1 within Mki-67 fully segregated bHR and bLR rats in our colony (Rnor5 coordinates, Fisher’s exact test: SNP 1\_214939984:  $p = 2.02E-11$ , SNP 1\_214940284:  $p = 2.02E-11$ ). **D)** A forest plot showing that Mki67 was consistently elevated in bLR rats in adulthood (boxes=Cohen’s D from each study +/-95% confidence intervals, “Model”=estimated effect size +/-95% confidence intervals provided by the meta-analysis, adult:  $\beta = -2.01$ ,  $p = 4.03E-05$ ,  $FDR = 1.99E-02$ ). **E)** Within the behavioral data accompanying the MBNI\_RNASeq\_F37 dataset, Mki67 (units=log(2) fragments per million (FPM)) showed a negative relationship with locomotor score ( $\beta = -0.000249$ ,  $R^2 = 0.41$ ,  $p = 0.0042$ ).

Running Head: bHR/bLR Hippocampal Gene Expression Meta-Analysis

**bLRs Exhibit Overall Elevated Endothelial and Microglia Specific Gene Expression:**

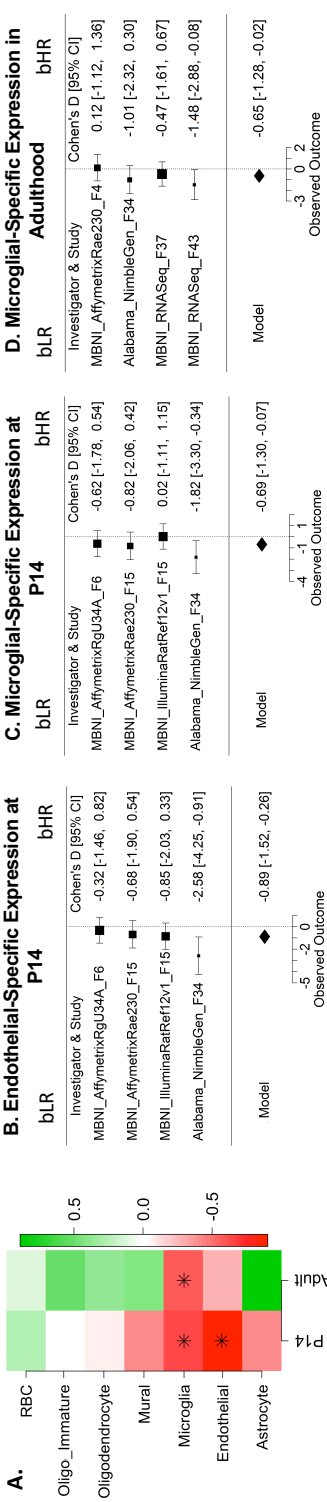

**Mfge8, which Promotes Alternative (M2) Activation of Microglia, is a Top bHR/bLR Candidate Gene**

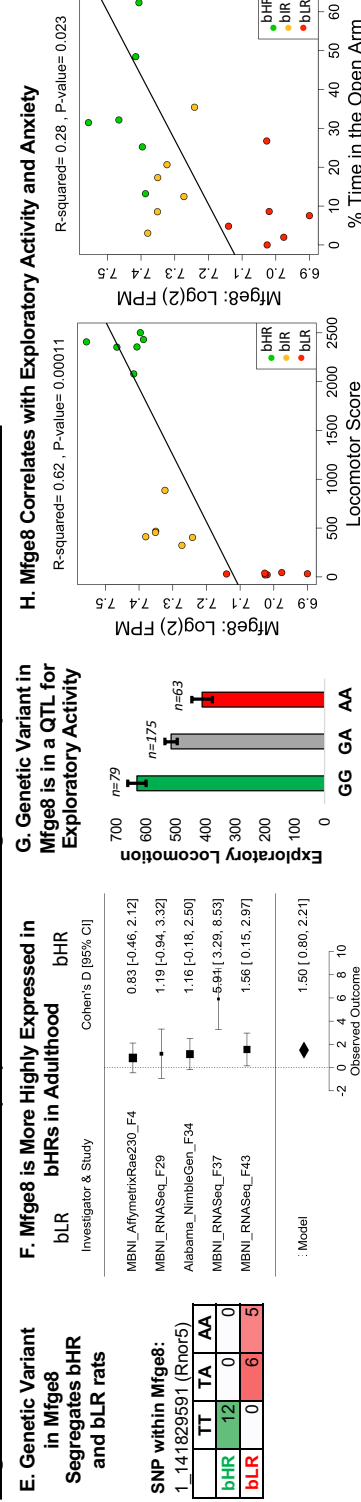

**C1qa, which Promotes Classical Activation of Microglia, is a Top bHR/bLR Candidate Gene:**

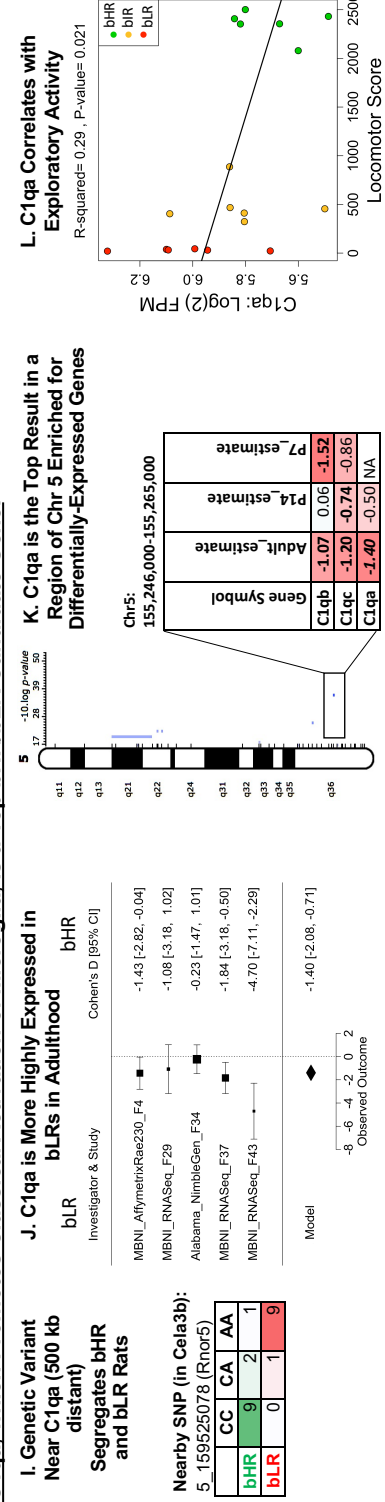



**Figure 10. Microglial-related gene expression differentiates bHR and bLR rats. A)** A heatmap illustrating the effect of bHR/bLR phenotype on cell type specific gene expression, which can reflect overall cell type balance (42) or activation: green=upregulated in bHRs, red=upregulated in bLRs, asterisks(\*) indicate  $p < 0.05$ . Note that only well-characterized non-neuronal cell type categories were included in this analysis. **B-D)** Forest plots (boxes=Cohen's D from each study  $\pm$  95% confidence intervals, "Model"=estimated effect size  $\pm$  95% confidence intervals provided by the meta-analysis) showing an upregulation in bLRs of **(B)** endothelial-specific gene expression at P14 ( $\beta = -0.89$ ,  $p = 5.75E-03$ ) and **(C-D)** microglial-specific gene expression **(C)** at P14 ( $\beta = -0.69$ ,  $p = 2.90E-02$ ) and **(D)** adulthood ( $\beta = -0.65$ ,  $p = 4.47E-02$ ). **E)** A genetic variant on Chr 1 in Milk fat globule-EGF factor 8 (Mfge8) segregates bHR and bLR rats in our colony (Fisher's exact test:  $p = 7.53E-08$ ). Mfge8 promotes alternative (M2) activation of microglia. **F)** A forest plot illustrating that Mfge8 is more highly expressed in bHRs than bLRs in the adult meta-analysis in all five adult datasets ( $\beta = 1.50$ ,  $p = 2.70E-05$ ,  $FDR = 1.73E-02$ ). **G)** Mfge8 is located on Chr 1 within a QTL for exploratory locomotor activity. An example of the correlation between genetic variation in this region and behavior is illustrated using the sequencing results from a nearby SNP (Rnor5 coordinates 1\_141117448) and exploratory locomotor activity measured in a bHRxbLR F2 intercross ( $n = 317$ ,  $adj.R^2 = 0.061$ ,  $p = 1.81E-05$ ,  $FDR = 0.002$ ). **H)** Within the behavioral data accompanying the MBNI\_RNASeq\_F37 dataset, Mfge8 (units=log(2) fragments per million (FPM)) showed a positive relationship with total locomotor score ( $\beta = 0.000146$ ,  $R^2 = 0.62$ ,  $p = 1.10E-04$ ) as well as the percent time in the open arms of the EPM ( $\beta = 0.00603$ ,  $R^2 = 0.28$ ,  $p = 2.30E-02$ ). **I)** A genetic variant on Chr 5 near Complement component C1q A Chain (500 kb distant) segregates bHR and bLR rats in our colony (Rnor5 coordinates 5\_159525078, Fisher's exact test:  $p = 1.09E-07$ ). C1qa promotes classical activation of microglia via the complement cascade. **J)** A forest plot illustrating that C1qa is more highly expressed in bLRs than bHRs in all five datasets in the adult meta-analysis ( $\beta = -1.40$ ,  $p = 6.57E-05$ ,  $FDR = 2.61E-02$ ). **K)** C1qa is the top DE gene ( $FDR < 0.05$ ) within a

Running Head: bHR/bLR Hippocampal Gene Expression Meta-Analysis

segment of Chr 5 enriched for DE genes. The table illustrates the DE genes within this region:  
estimate=estimated effect size (red/negative=higher expression in bLRs), bold= $p < 0.05$ ,  
bold+italic= $FDR < 0.05$ . L) Within the behavioral data accompanying the MBNI\_RNASeq\_F37  
dataset, C1qa showed a negative relationship with total locomotor score (C1qa:  $\beta = -5.17E-04$ ,  
 $R^2 = 0.29$ ,  $p = 2.09E-02$ ).
